# Supplementary material for: Synthesis of dibenzocyclohepta[1,2-a]naphthalene derivatives from phenylacetaldehyde and alkynyl benzyl alcohols via sequential electrophilic addition and double Friedel–Crafts reactions
Source: Royal Society of Chemistry journal article supplement (doi:10.1039/d1ob00057h), 2021-01-01

# **Synthesis of dibenzo cyclohepta[1,2-a]naphthalene derivatives from phenylacetaldehyde and alkynyl benzyl alcohols via sequential electrophilic addition and double Friedel-Crafts reactions**

*Archana K. Sahu, Ramanjaneyulu Unnava, Bipin K. Behera and Anil K. Saikia*

## **Table of content**

|                                      |               |
|--------------------------------------|---------------|
| 1. HRMS spectra of all new compounds | <b>S1-S27</b> |
|--------------------------------------|---------------|

# HRMS Spectrum of 1c

|                      |               |                    |        |                        |        |                               |                       |
|----------------------|---------------|--------------------|--------|------------------------|--------|-------------------------------|-----------------------|
| <b>Sample Name</b>   | ARC-SM-2OME   | <b>Position</b>    | Vial 1 | <b>Instrument Name</b> | QTOF   | <b>User Name</b>              |                       |
| <b>Inj Vol</b>       | -1            | <b>InjPosition</b> |        | <b>SampleType</b>      | Sample | <b>IRM Calibration Status</b> | All Ions Missed       |
| <b>Data Filename</b> | ARC-SM-2OME.d | <b>ACQ Method</b>  |        | <b>Comment</b>         |        | <b>Acquired Time</b>          | 3/28/2018 11:42:42 AM |

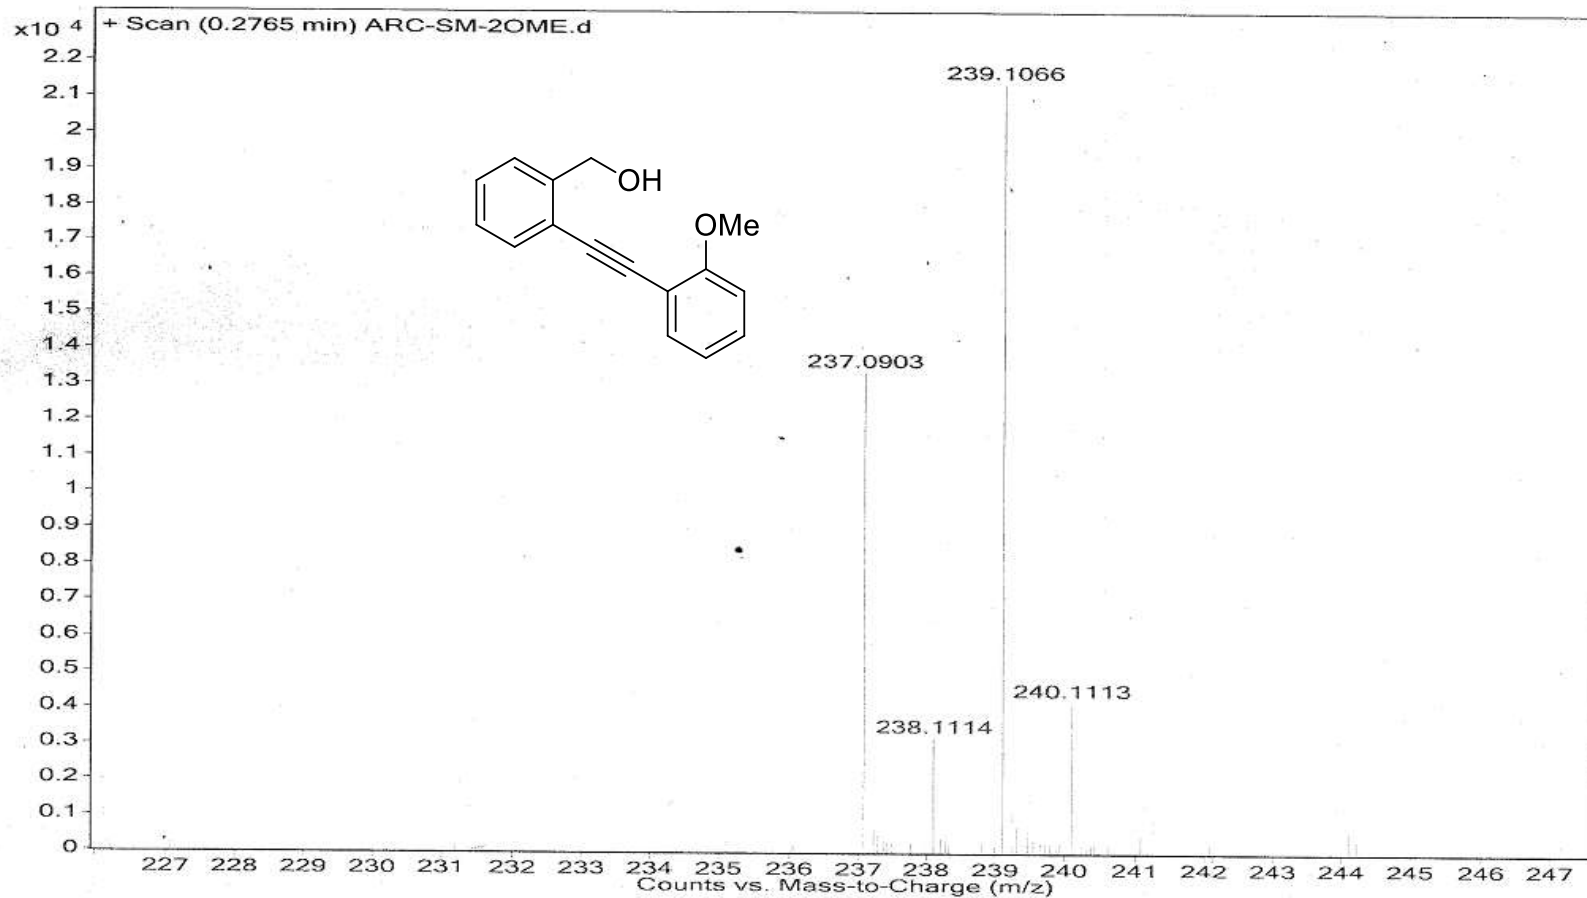

1d

# HRMS Spectrum of 1e

|               |                |             |        |                 |        |                        |                      |
|---------------|----------------|-------------|--------|-----------------|--------|------------------------|----------------------|
| Sample Name   | ARC-SM-COOME   | Position    | Vial 1 | Instrument Name | QTOF   | User Name              |                      |
| Inj Vol       | -1             | InjPosition |        | SampleType      | Sample | IRM Calibration Status | Success              |
| Data Filename | ARC-SM-COOME.d | ACQ Method  |        | Comment         |        | Acquired Time          | 4/16/2018 4:23:45 PM |

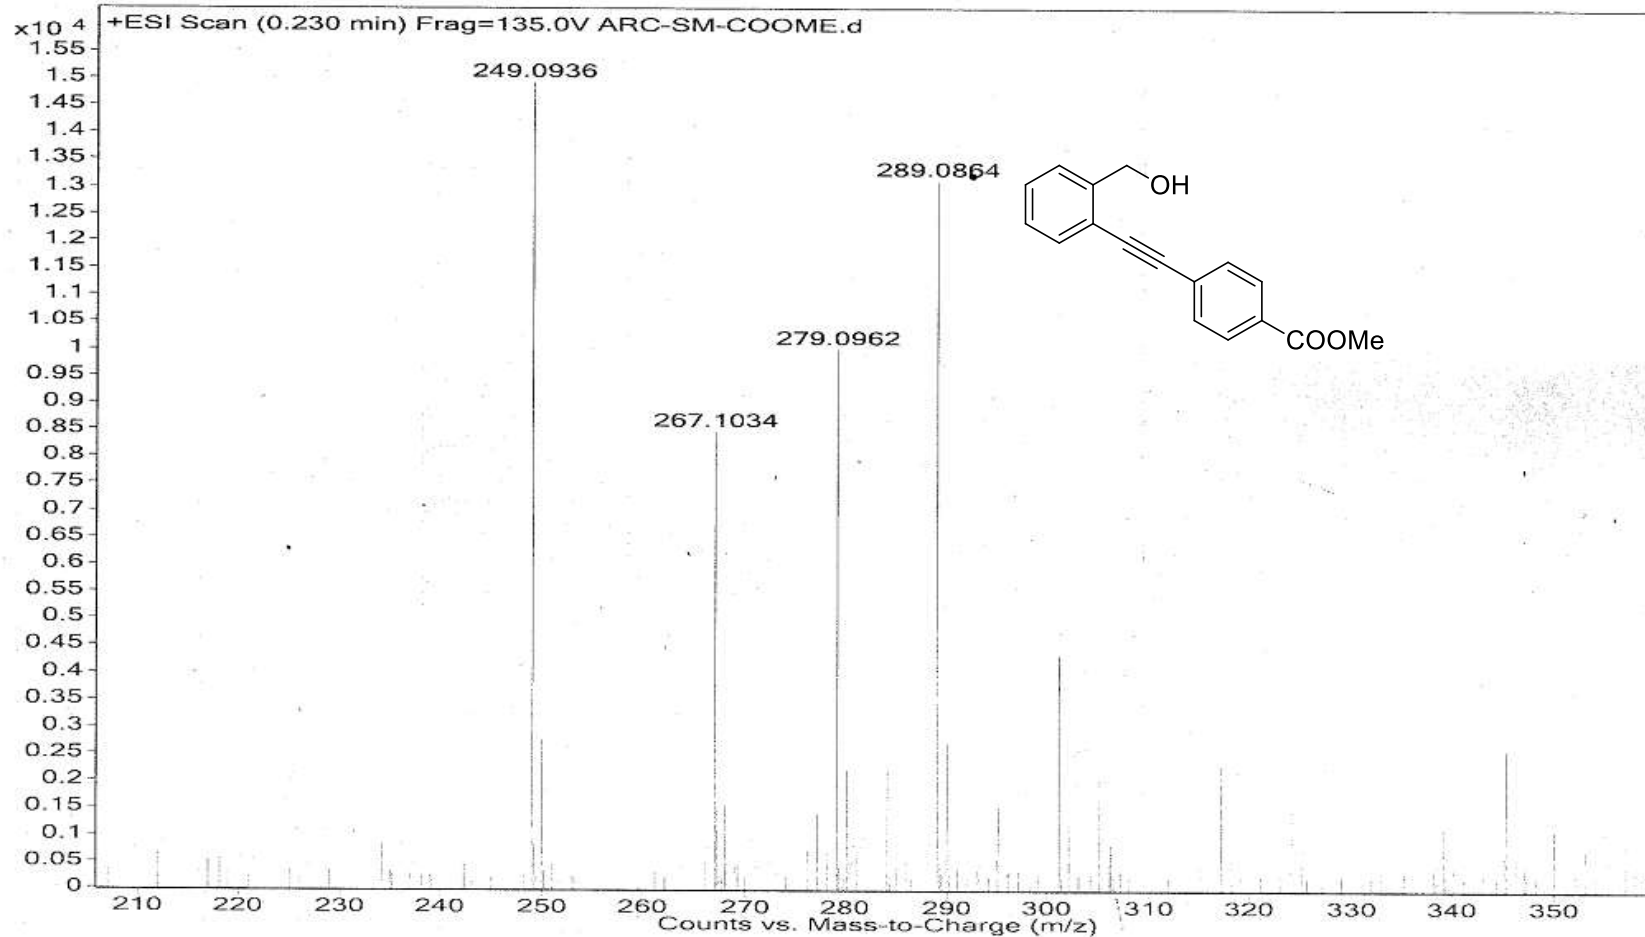

# HRMS Spectrum of 1f

|               |               |             |        |                 |        |                        |                       |
|---------------|---------------|-------------|--------|-----------------|--------|------------------------|-----------------------|
| Sample Name   | ARC-SM-3OME   | Position    | Vial 1 | Instrument Name | QTOF   | User Name              |                       |
| Inj Vol       | -1            | InjPosition |        | SampleType      | Sample | IRM Calibration Status | All Ions Missed       |
| Data Filename | ARC-SM-3OME.d | ACQ Method  |        | Comment         |        | Acquired Time          | 3/28/2018 11:44:29 AM |

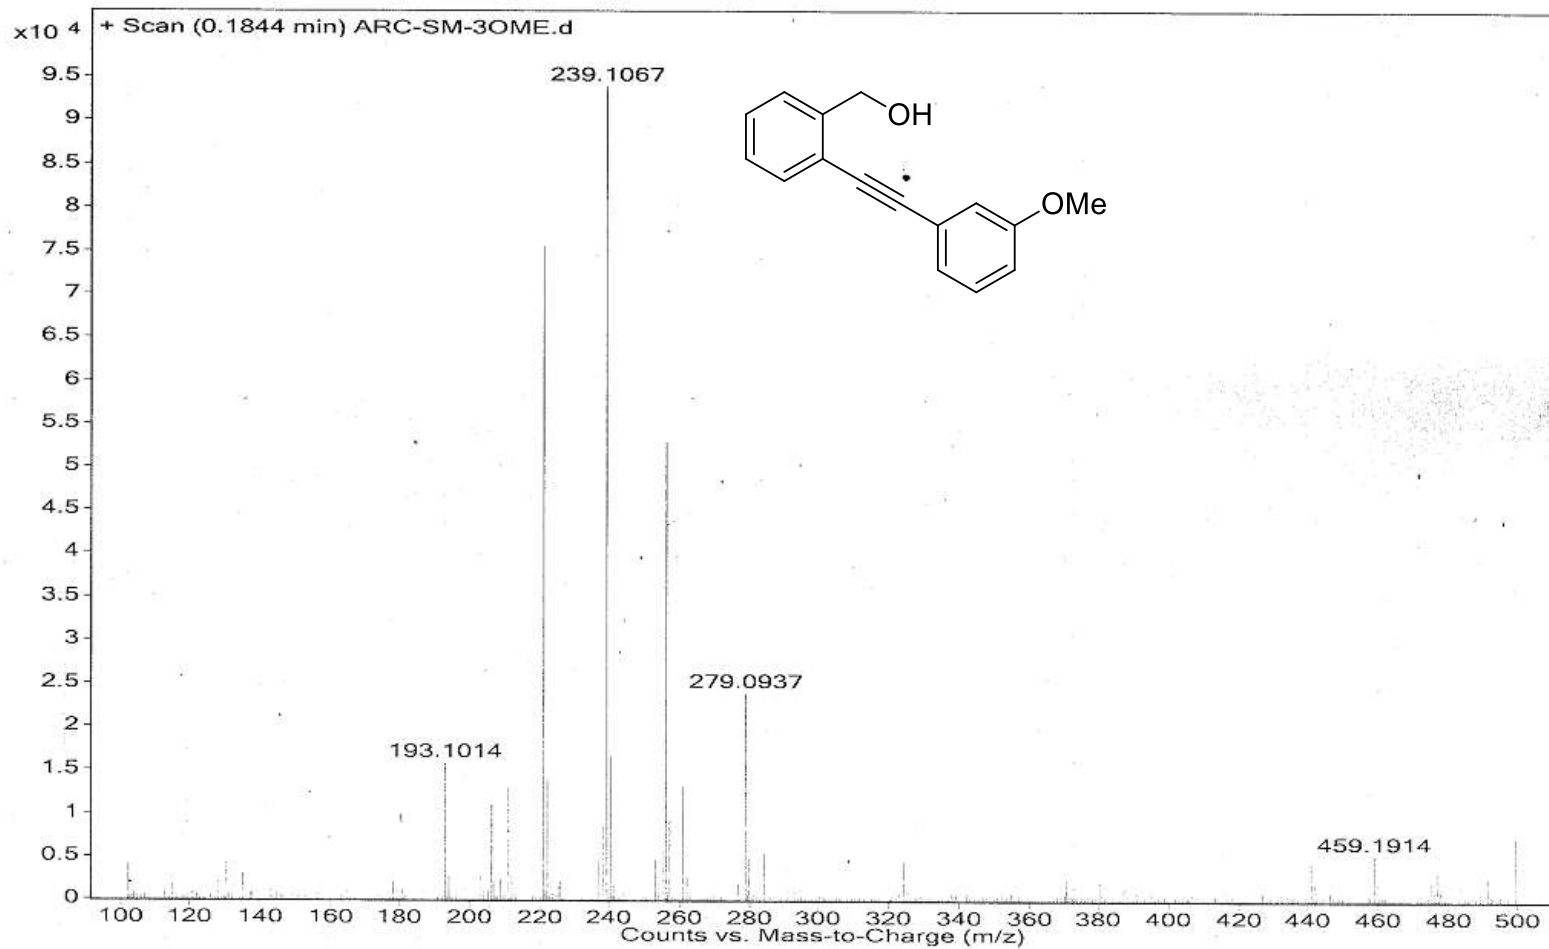

18

# HRMS Spectrum of 1g

|               |                 |             |        |                 |        |                        |                      |
|---------------|-----------------|-------------|--------|-----------------|--------|------------------------|----------------------|
| Sample Name   | ARC-SM-ACETAL   | Position    | Vial 1 | Instrument Name | QTOF   | User Name              |                      |
| Inj Vol       | -1              | InjPosition |        | SampleType      | Sample | IRM Calibration Status | Success              |
| Data Filename | ARC-SM-ACETAL.d | ACQ Method  |        | Comment         |        | Acquired Time          | 4/12/2018 4:21:23 PM |

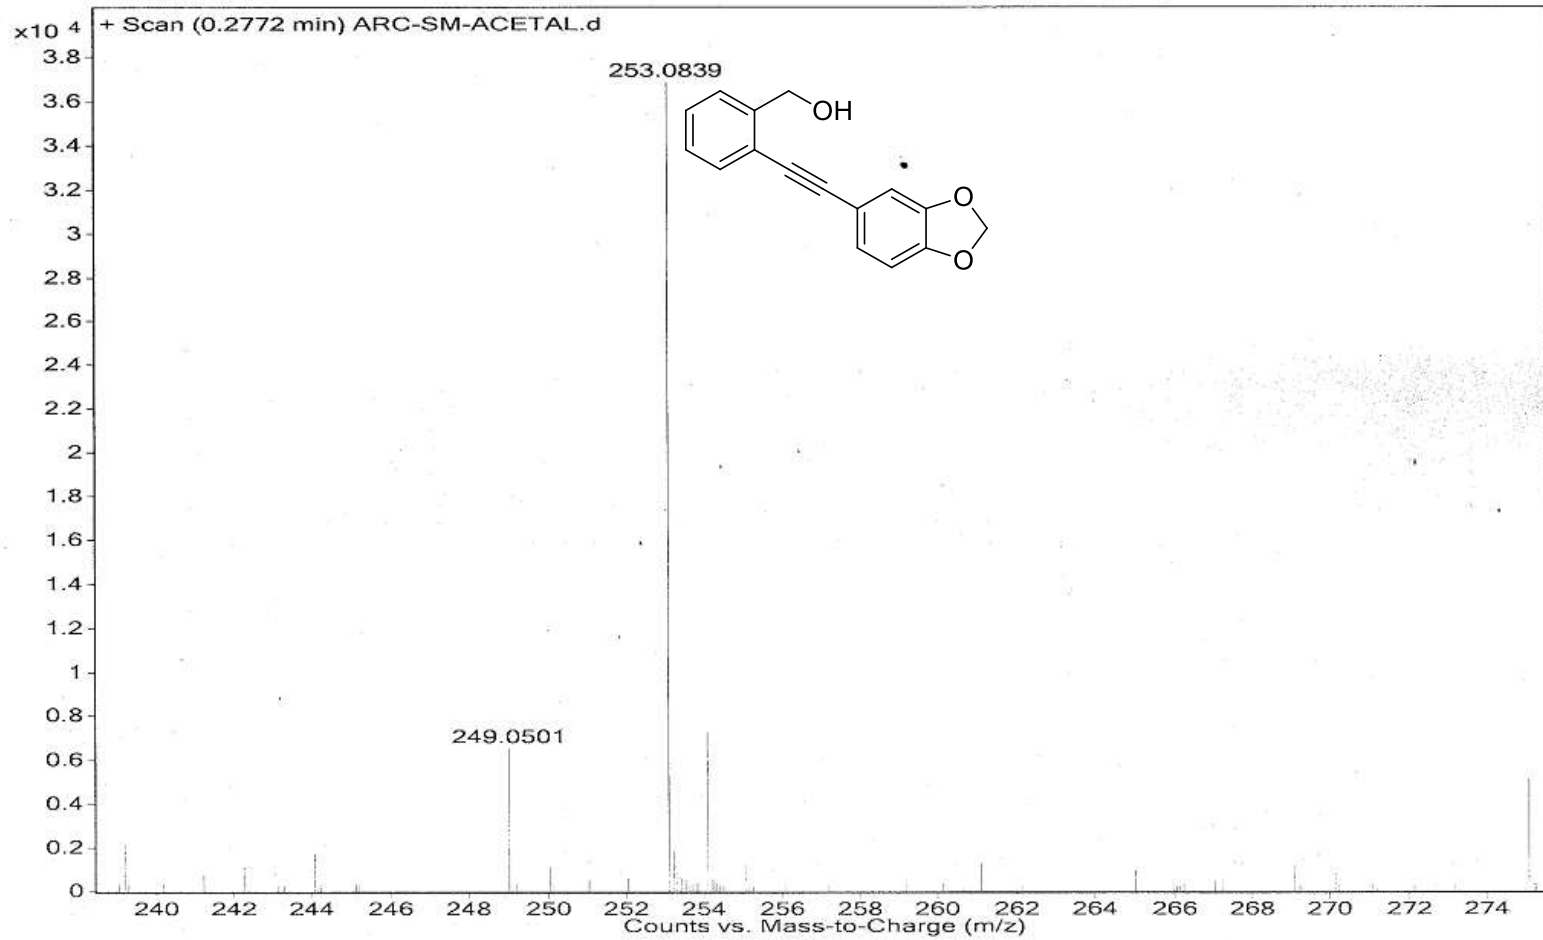

# HRMS Spectrum of 1n

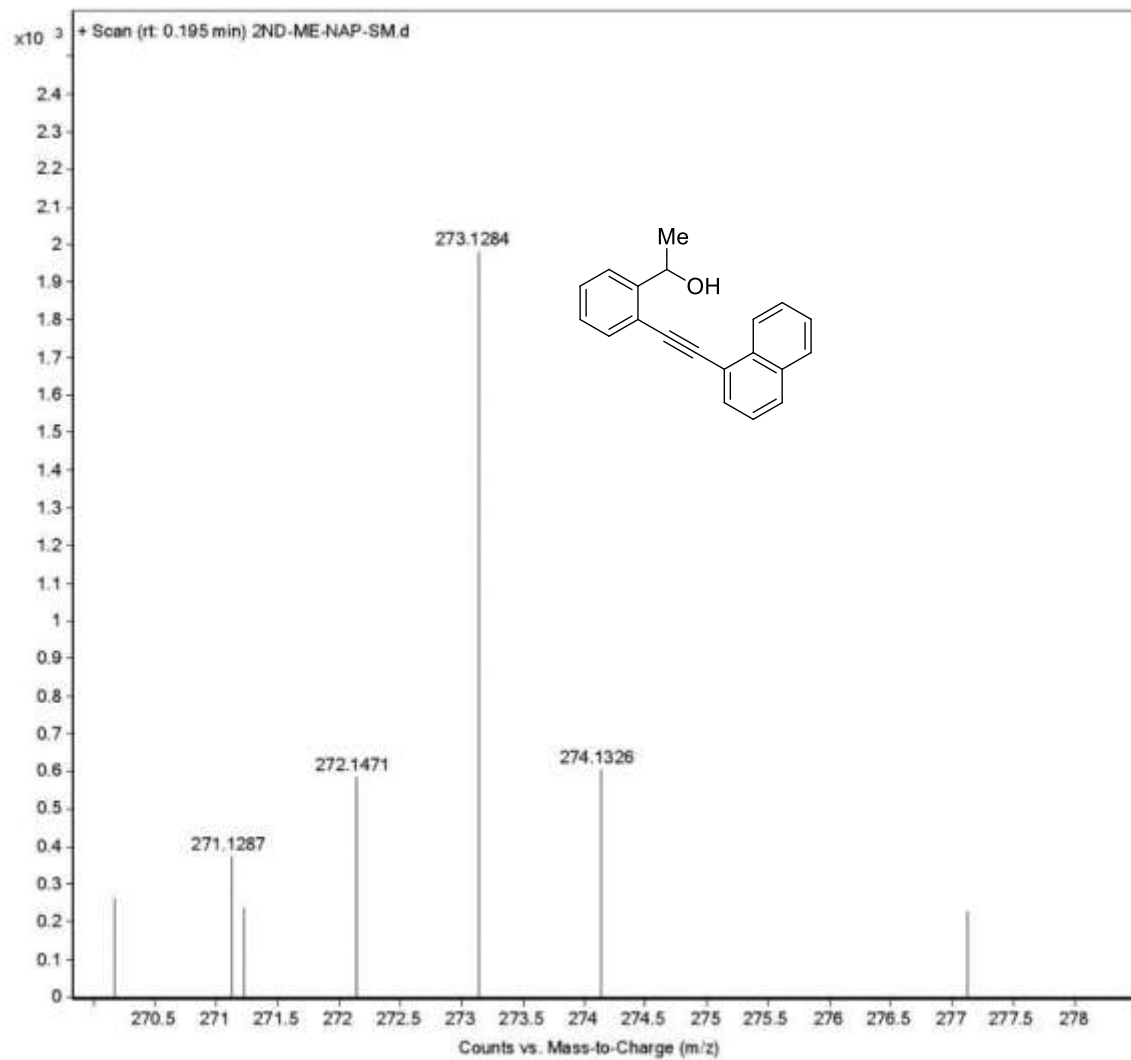

# HRMS Spectrum of 3a

|               |           |             |        |                 |        |                        |                   |
|---------------|-----------|-------------|--------|-----------------|--------|------------------------|-------------------|
| Sample Name   | ARC-P-H   | Position    | Vial 1 | Instrument Name | QTOF   | User Name              |                   |
| Inj Vol       | -1        | InjPosition |        | SampleType      | Sample | IRM Calibration Status | All Ions Missed   |
| Data Filename | ARC-P-H.d | ACQ Method  |        | Comment         |        | Acquired Time          | 3/22/2018 10:33:5 |

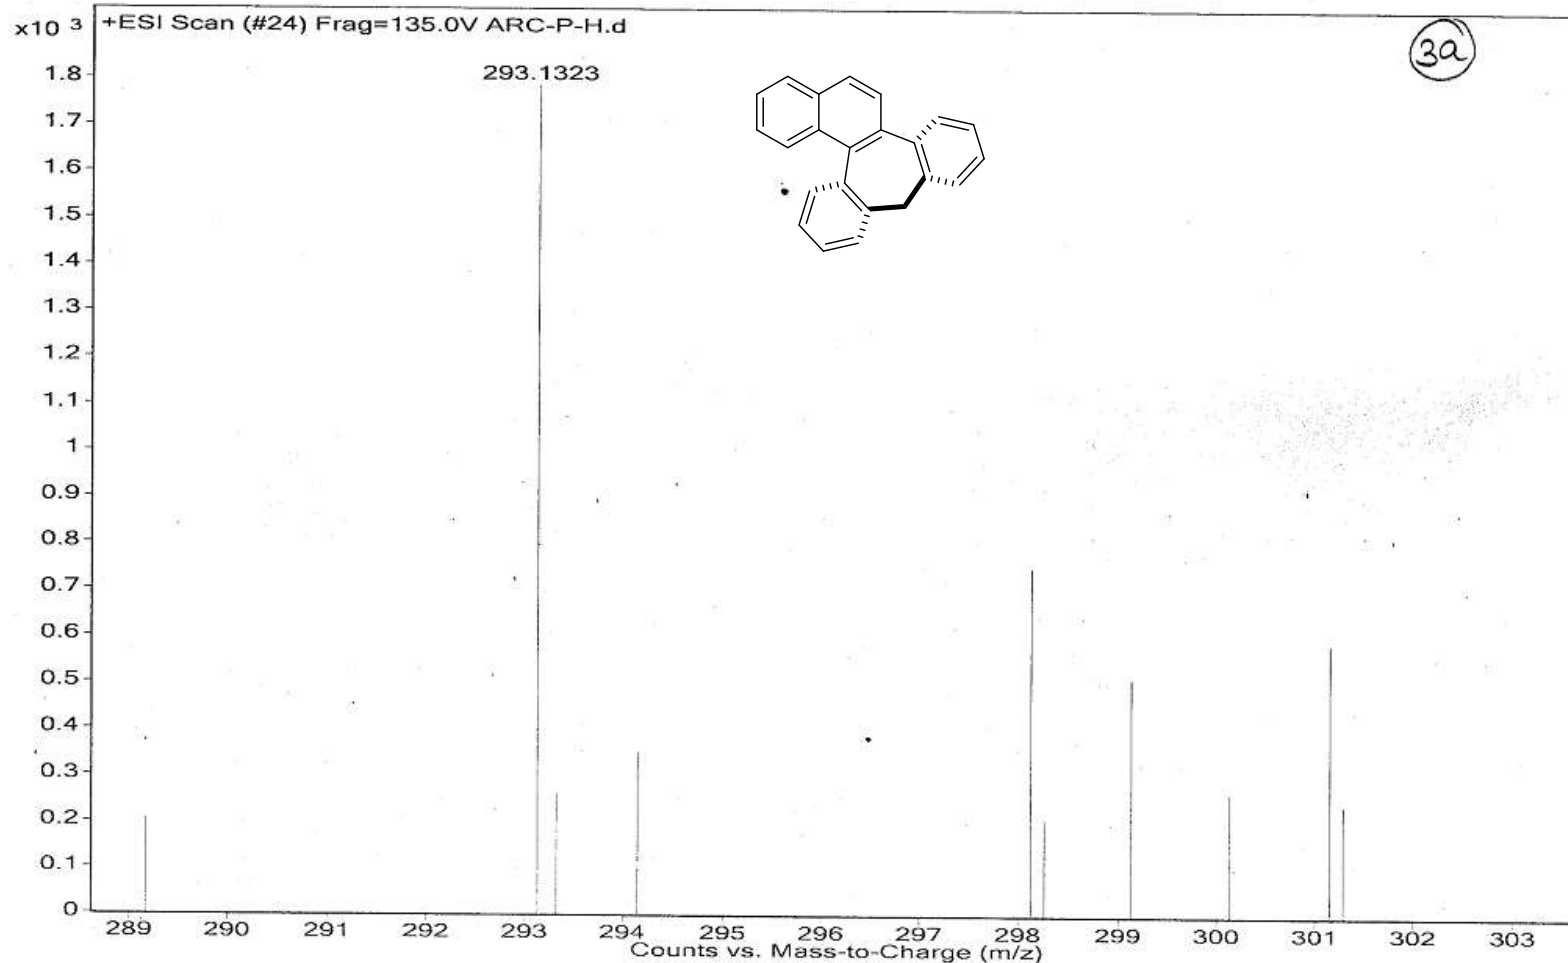

# HRMS Spectrum of 3b

|               |              |             |        |                 |        |                        |                       |
|---------------|--------------|-------------|--------|-----------------|--------|------------------------|-----------------------|
| Sample Name   | ARC-ME-H-4   | Position    | Vial 1 | Instrument Name | QTOF   | User Name              |                       |
| Inj Vol       | -1           | InjPosition |        | SampleType      | Sample | IRM Calibration Status | All Ions Missed       |
| Data Filename | ARC-ME-H-4.d | ACQ Method  |        | Comment         |        | Acquired Time          | 3/26/2018 10:17:45 AM |

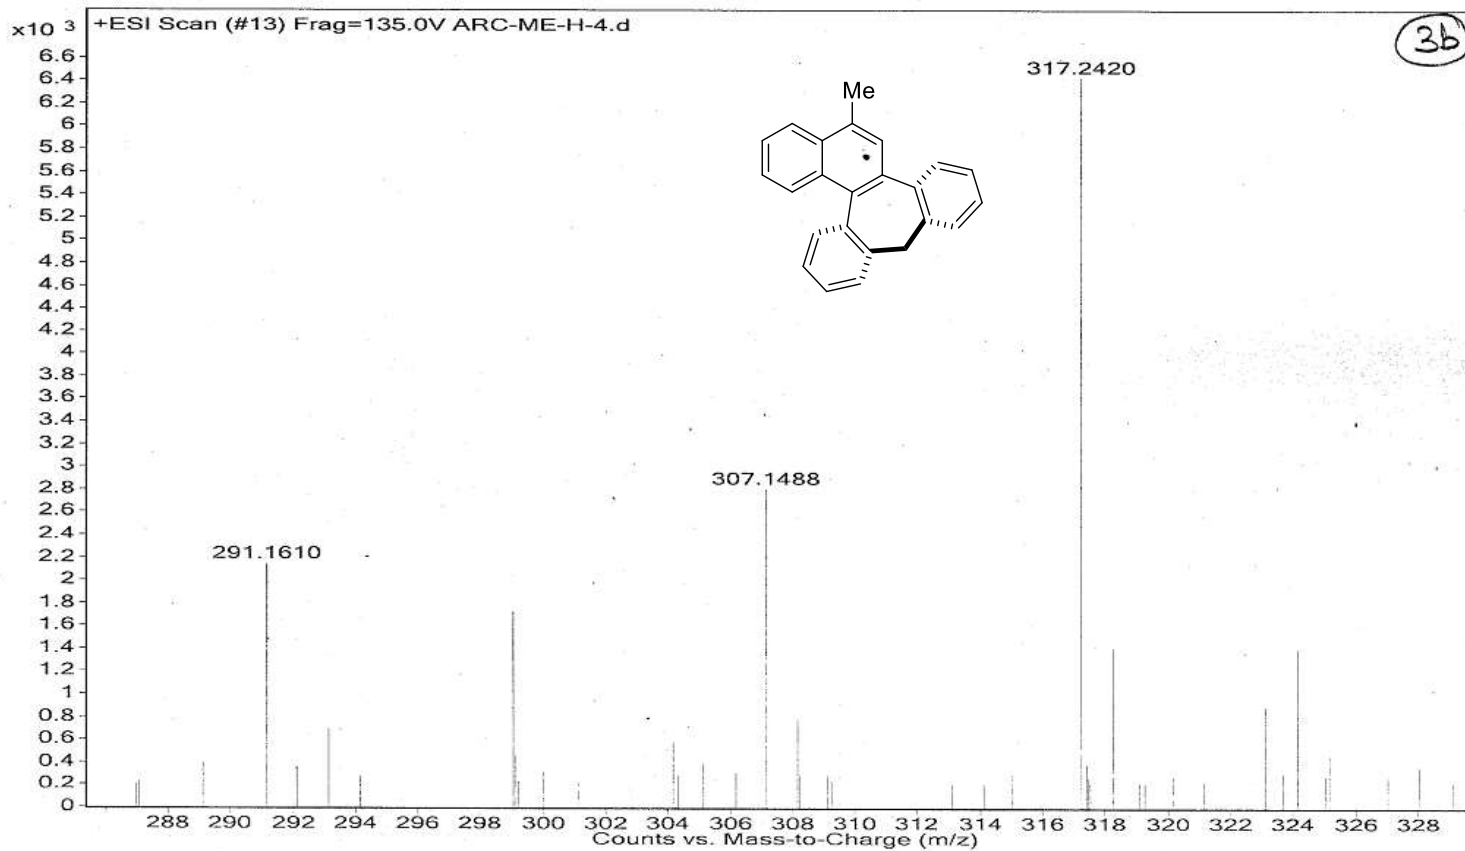



# HRMS Spectrum of 3c

|               |             |             |        |                 |        |                        |                      |
|---------------|-------------|-------------|--------|-----------------|--------|------------------------|----------------------|
| Sample Name   | ARC-PME-A   | Position    | Vial 1 | Instrument Name | QTOF   | User Name              |                      |
| Inj Vol       | -1          | InjPosition |        | SampleType      | Sample | IRM Calibration Status | Success              |
| Data Filename | ARC-PME-A.d | ACQ Method  |        | Comment         |        | Acquired Time          | 4/16/2018 4:20:08 PM |

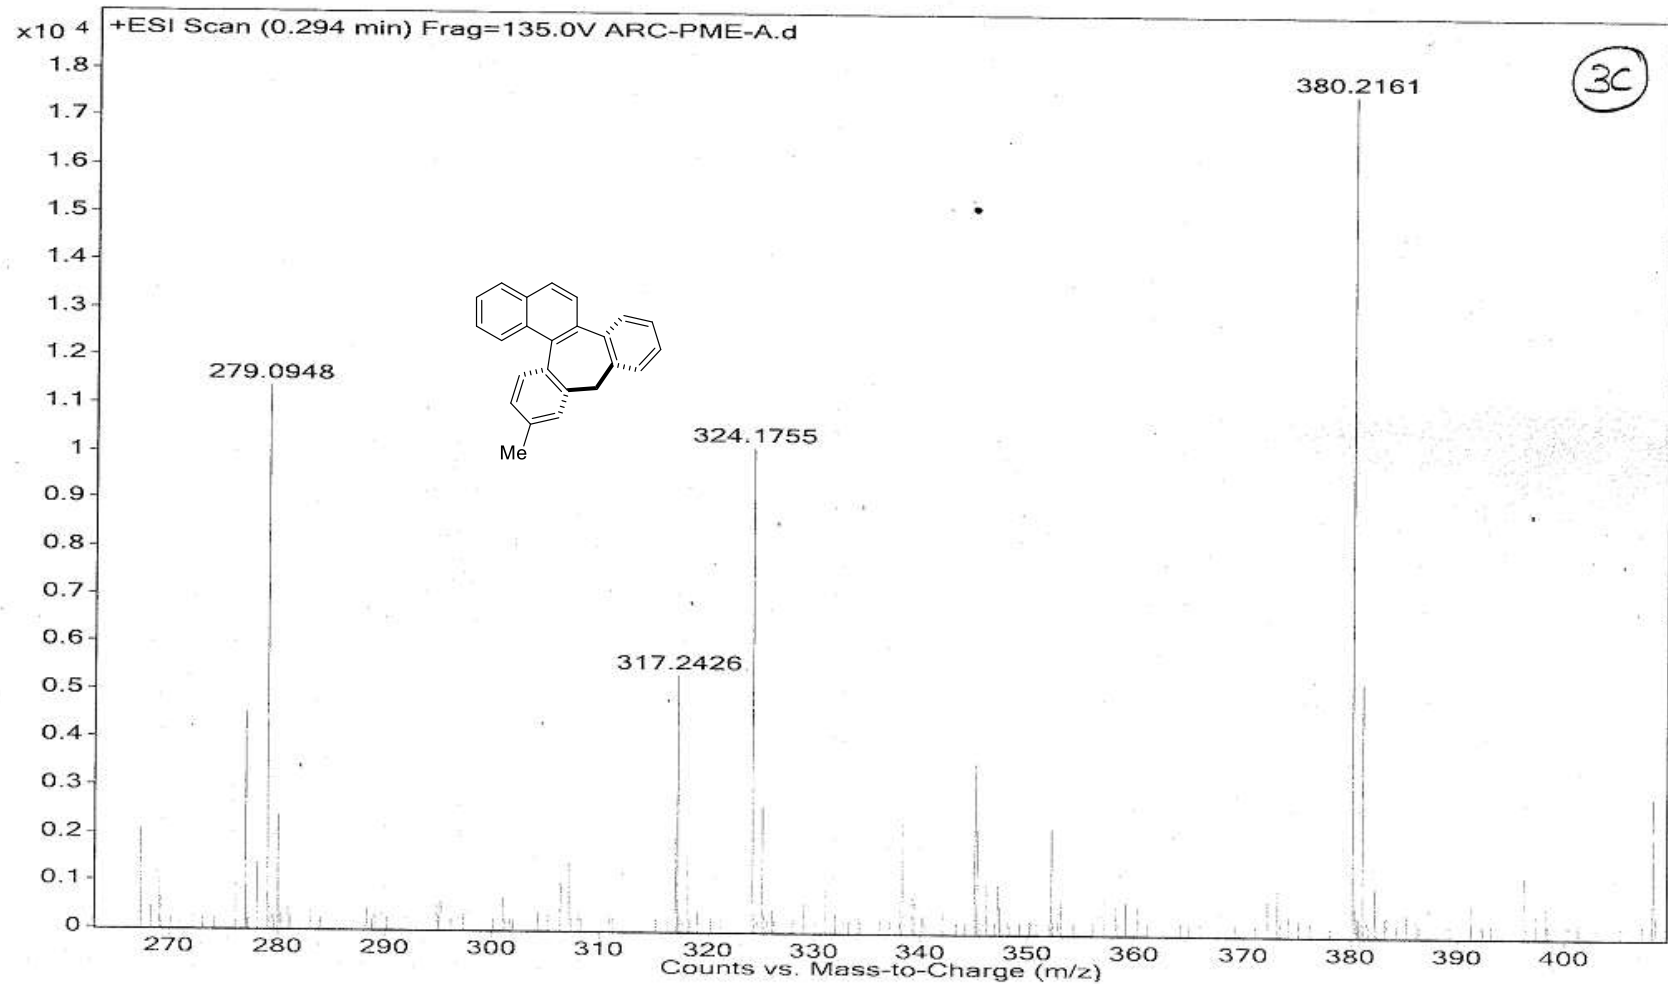

# HRMS Spectrum of 3d

|               |                 |             |        |                 |        |                        |                       |
|---------------|-----------------|-------------|--------|-----------------|--------|------------------------|-----------------------|
| Sample Name   | ARC-P-ME-ME-1   | Position    | Vial 1 | Instrument Name | QTOF   | User Name              |                       |
| Inj Vol       | -1              | InjPosition |        | SampleType      | Sample | IRM Calibration Status | Some Ions Missed      |
| Data Filename | ARC-P-ME-ME-1.d | ACQ Method  |        | Comment         |        | Acquired Time          | 3/22/2018 10:48:23 AM |

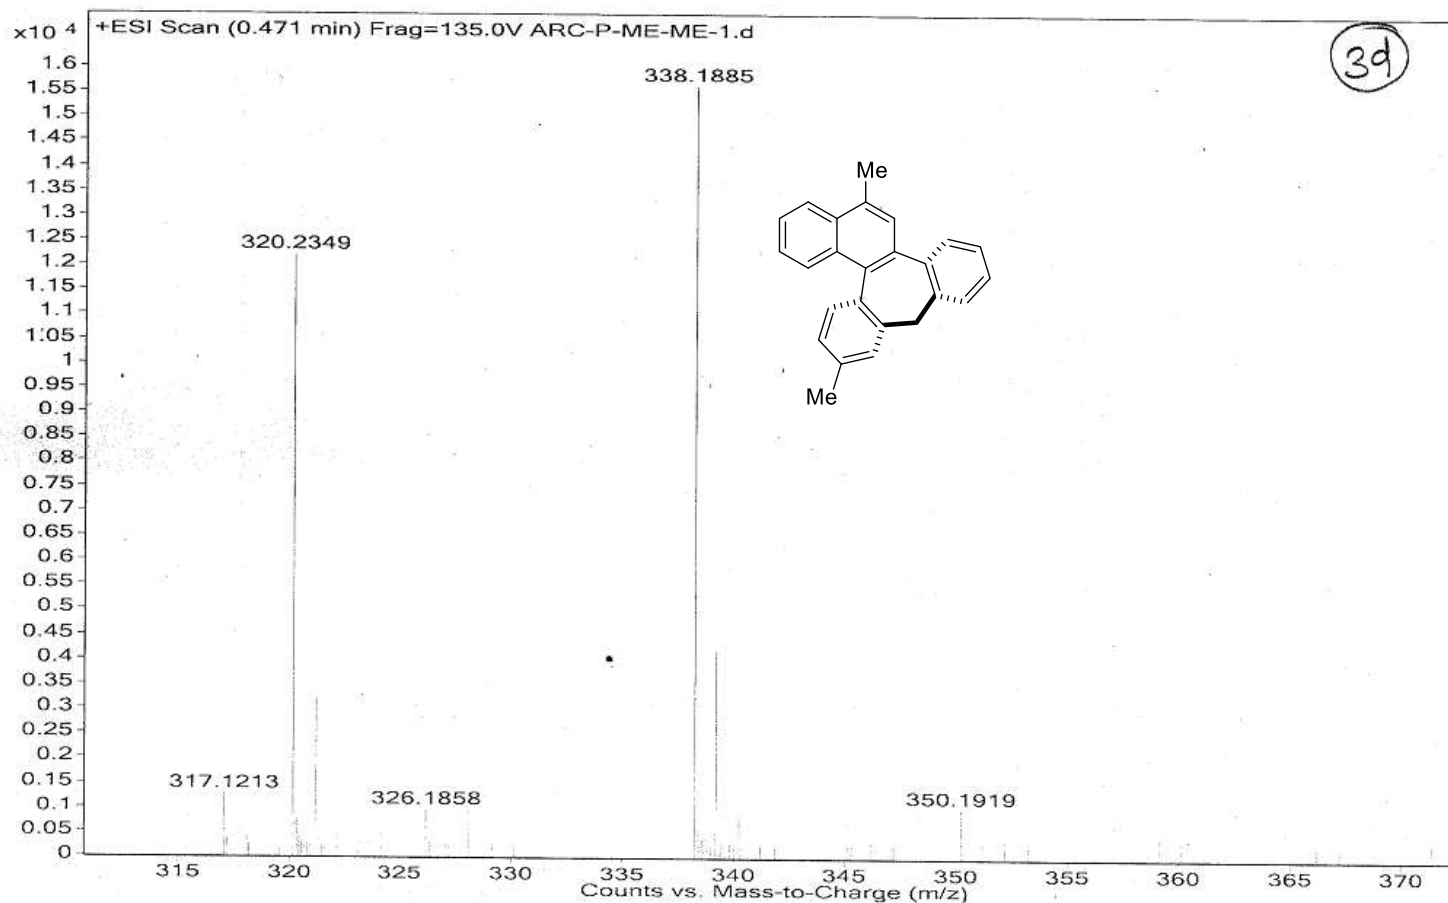

# HRMS Spectrum of 3e

|               |              |             |        |                 |        |                        |                       |
|---------------|--------------|-------------|--------|-----------------|--------|------------------------|-----------------------|
| Sample Name   | ARC-P2-OME   | Position    | Vial 1 | Instrument Name | QTOF   | User Name              |                       |
| Inj Vol       | -1           | InjPosition |        | SampleType      | Sample | IRM Calibration Status | All Ions Missed       |
| Data Filename | ARC-P2-OME.d | ACQ Method  |        | Comment         |        | Acquired Time          | 3/22/2018 10:39:30 AM |

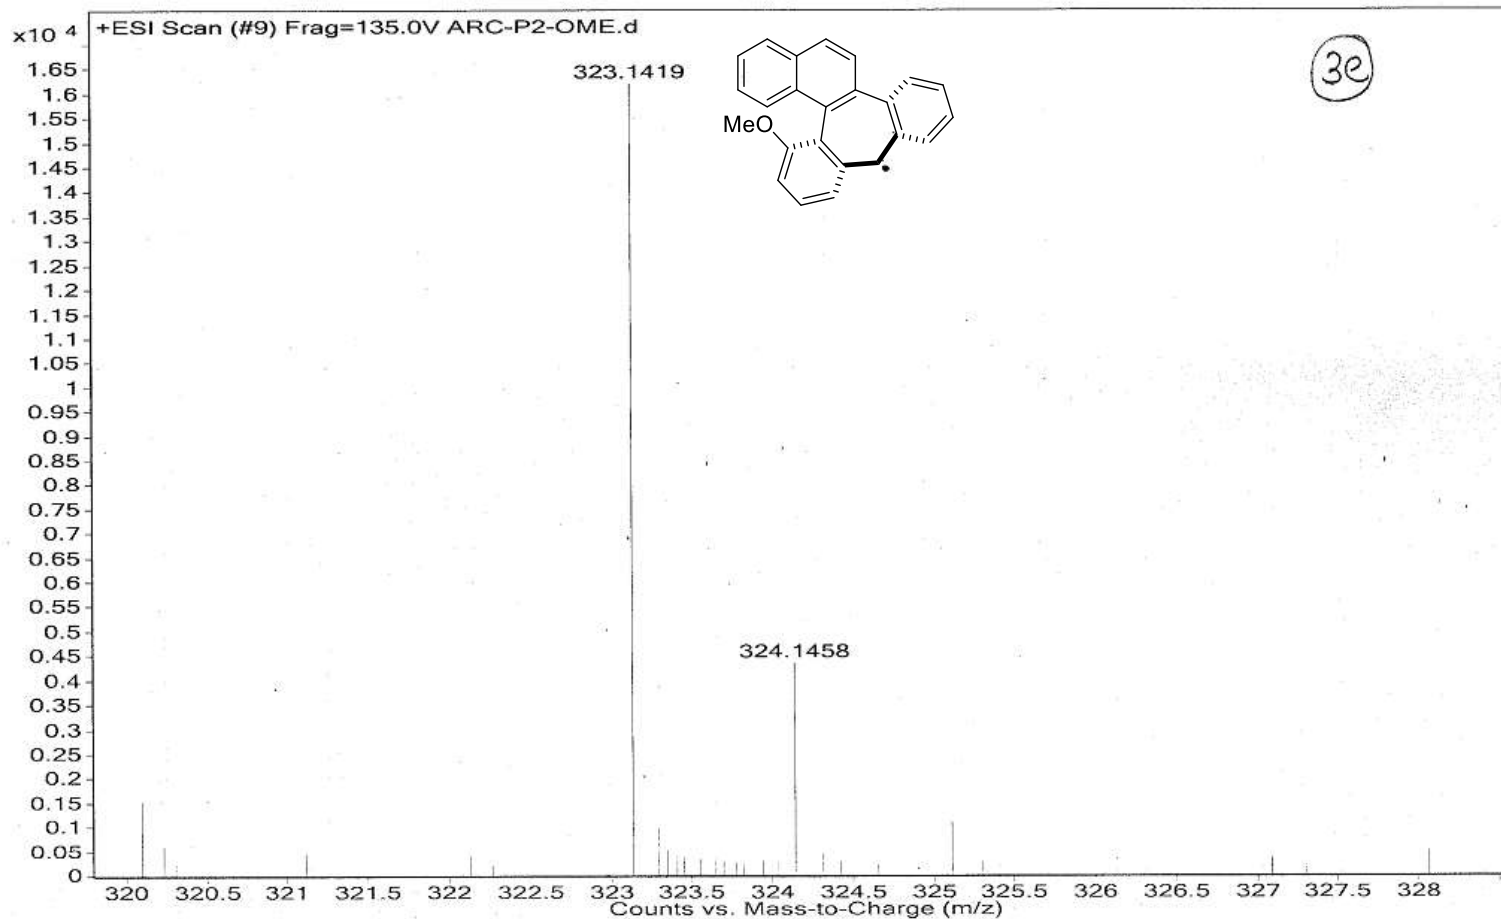

# HRMS Spectrum of 3f

|               |             |             |        |                 |        |                        |                       |
|---------------|-------------|-------------|--------|-----------------|--------|------------------------|-----------------------|
| Sample Name   | ARC-P-OME   | Position    | Vial 1 | Instrument Name | QTOF   | User Name              |                       |
| Inj Vol       | -1          | InjPosition |        | SampleType      | Sample | IRM Calibration Status | All Ions Missed       |
| Data Filename | ARC-P-OME.d | ACQ Method  |        | Comment         |        | Acquired Time          | 3/22/2018 10:37:55 AM |

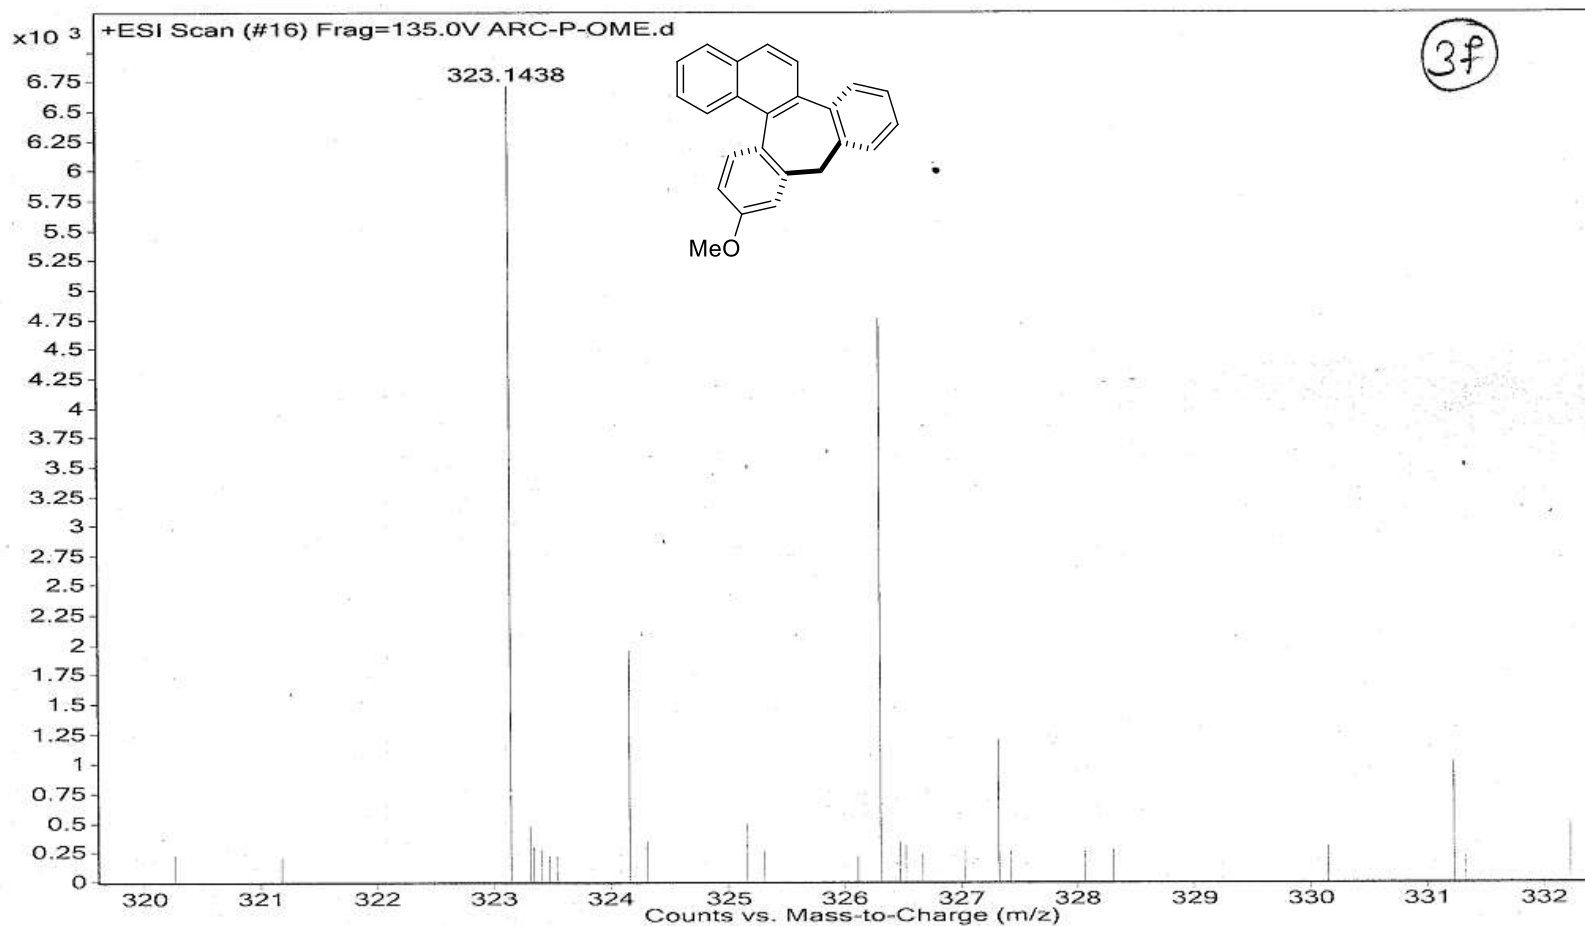

# HRMS Spectrum of 3h

|               |                |             |        |                 |        |                        |                      |
|---------------|----------------|-------------|--------|-----------------|--------|------------------------|----------------------|
| Sample Name   | ARC-P-3OME-L   | Position    | Vial 1 | Instrument Name | QTOF   | User Name              |                      |
| Inj Vol       | -1             | InjPosition |        | SampleType      | Sample | IRM Calibration Status | Success              |
| Data Filename | ARC-P-3OME-L.d | ACQ Method  |        | Comment         |        | Acquired Time          | 5/2/2018 11:18:13 AM |

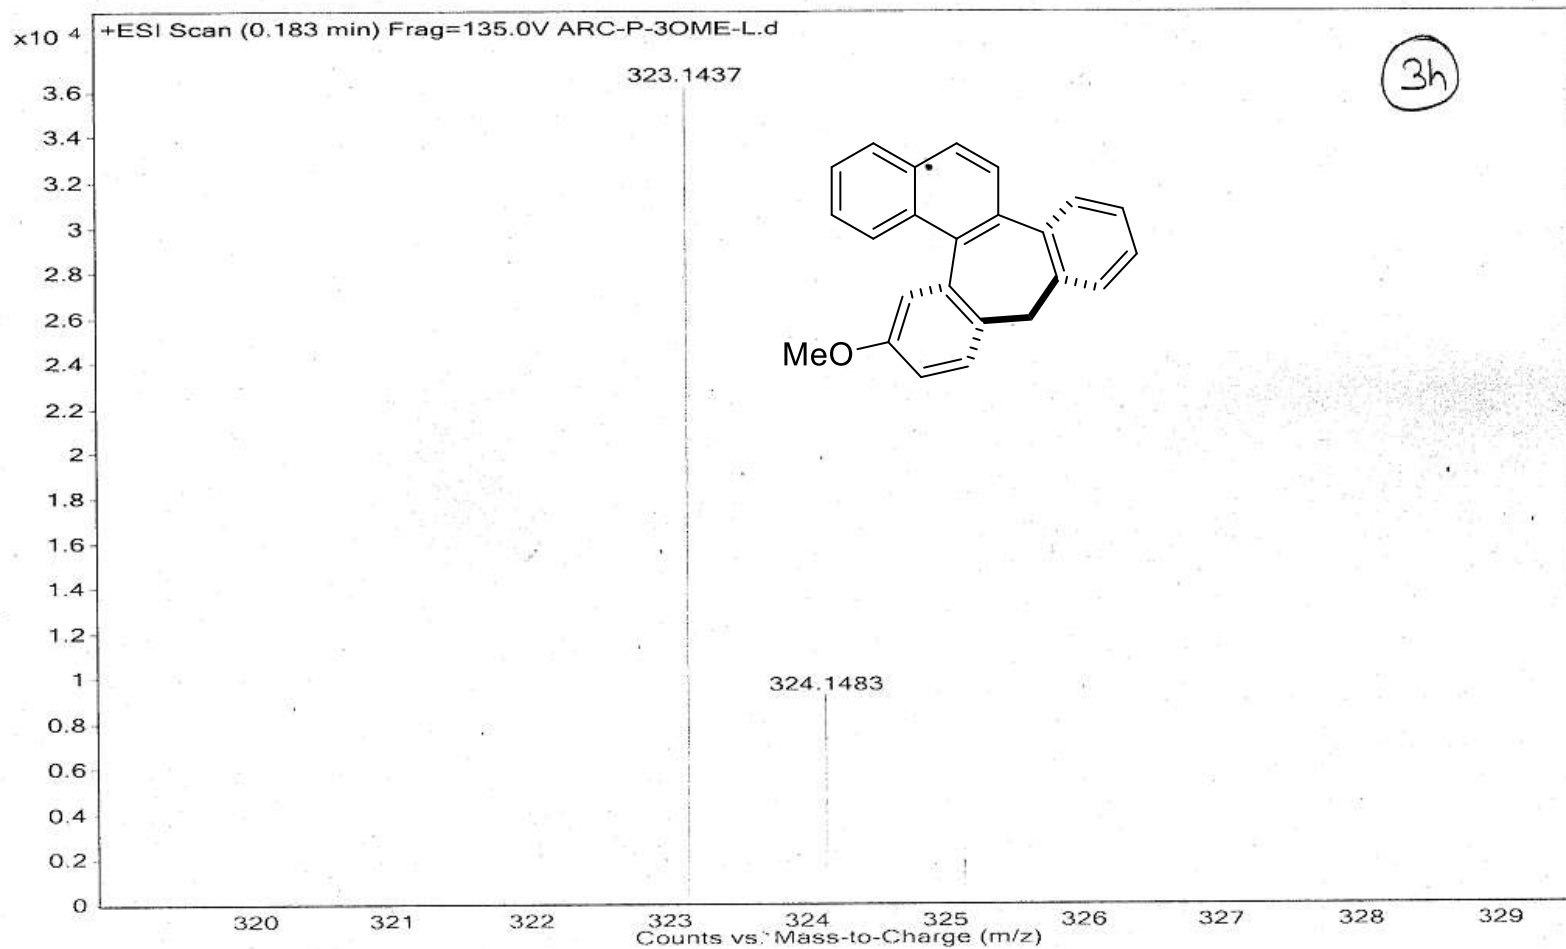

# HRMS Spectrum of 4h

|               |                 |             |        |                 |        |                        |                       |
|---------------|-----------------|-------------|--------|-----------------|--------|------------------------|-----------------------|
| Sample Name   | ARC-P-3-OME-U   | Position    | Vial 1 | Instrument Name | QTOF   | User Name              |                       |
| Inj Vol       | -1              | InjPosition |        | SampleType      | Sample | IRM Calibration Status | All Ions Missed       |
| Data Filename | ARC-P-3-OME-U.d | ACQ Method  |        | Comment         |        | Acquired Time          | 3/22/2018 10:46:55 AM |

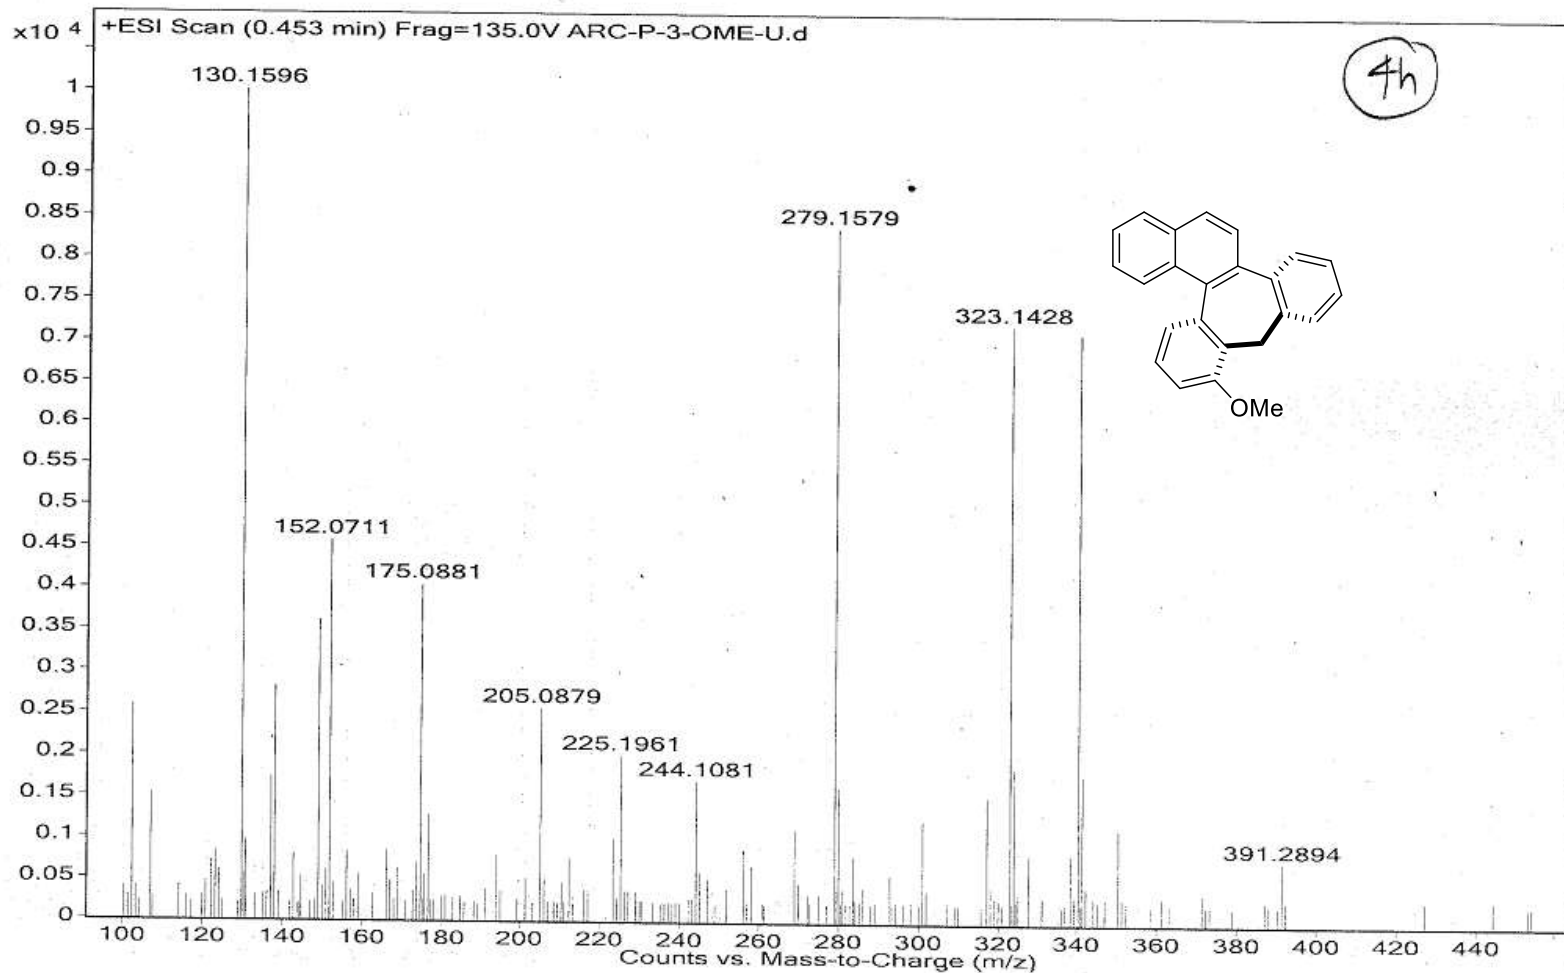

# HRMS Spectrum of 3i

|               |                |             |        |                 |        |                        |                      |
|---------------|----------------|-------------|--------|-----------------|--------|------------------------|----------------------|
| Sample Name   | ARC-ME-OME-A   | Position    | Vial 1 | Instrument Name | QTOF   | User Name              |                      |
| Inj Vol       | -1             | InjPosition |        | SampleType      | Sample | IRM Calibration Status | Success              |
| Data Filename | ARC-ME-OME-A.d | ACQ Method  |        | Comment         |        | Acquired Time          | 4/16/2018 4:09:27 PM |

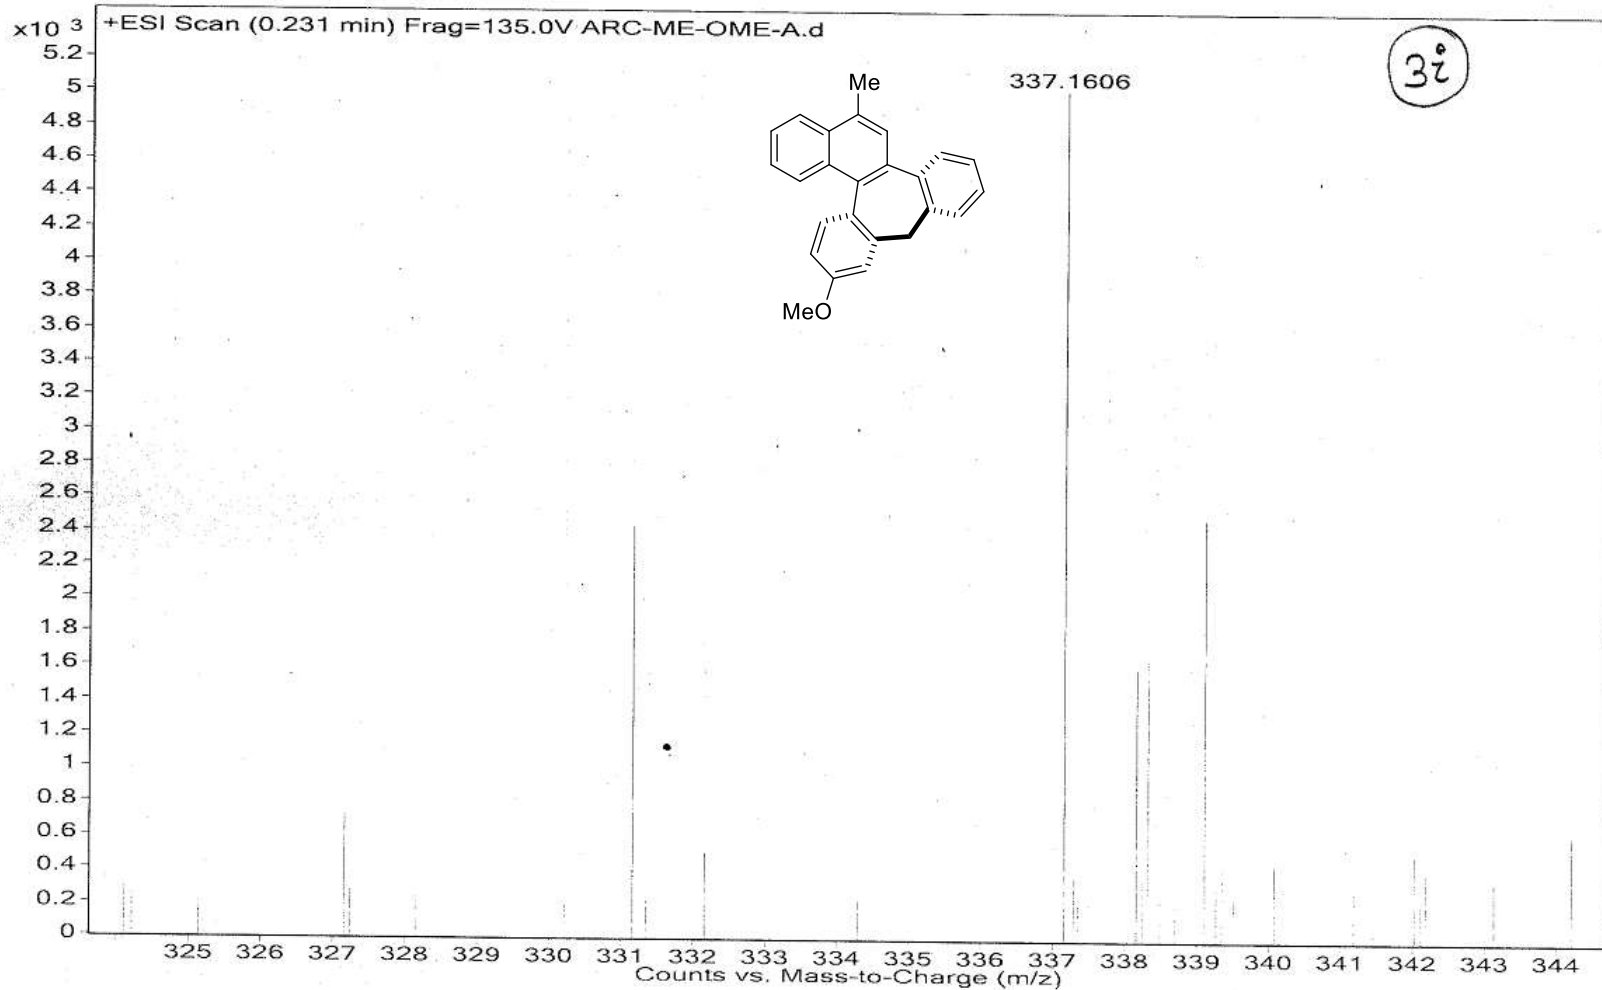

# HRMS Spectrum of 3j

|               |                  |             |        |                 |        |                        |                      |
|---------------|------------------|-------------|--------|-----------------|--------|------------------------|----------------------|
| Sample Name   | ARC-PME-2OME-L   | Position    | Vial 1 | Instrument Name | QTOF   | User Name              |                      |
| Inj Vol       | -1               | InjPosition |        | SampleType      | Sample | IRM Calibration Status | Success              |
| Data Filename | ARC-PME-2OME-L.d | ACQ Method  |        | Comment         |        | Acquired Time          | 4/16/2018 4:25:19 PM |

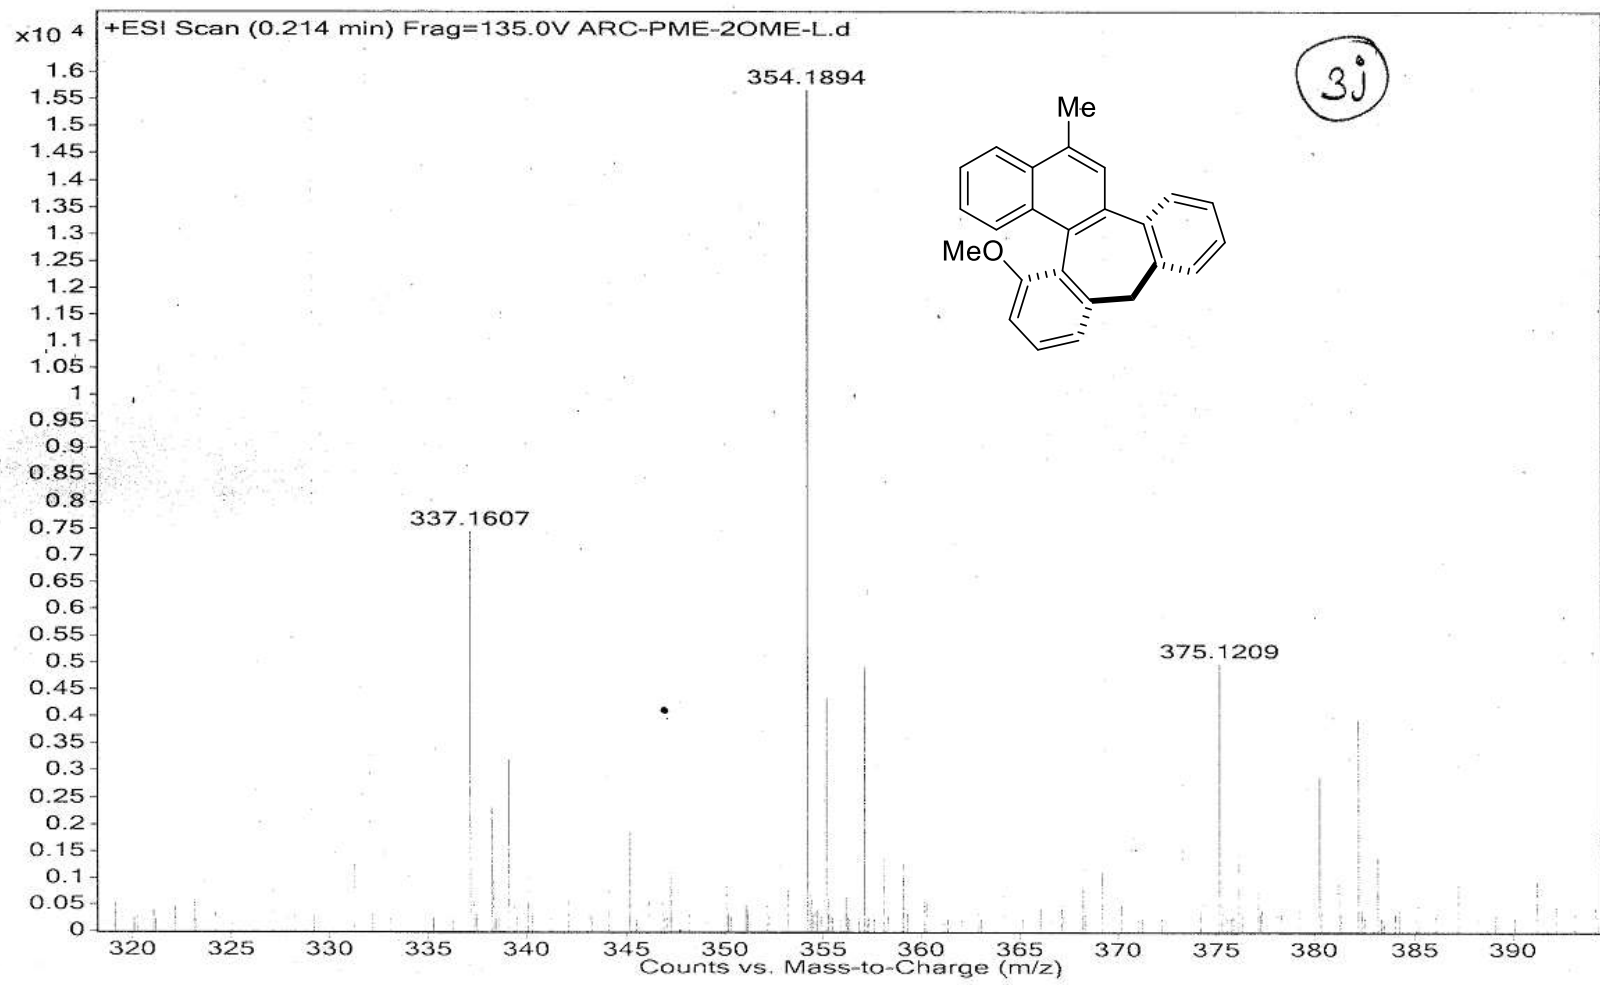



# HRMS Spectrum of 3k

|               |               |             |        |                 |        |                        |                      |
|---------------|---------------|-------------|--------|-----------------|--------|------------------------|----------------------|
| Sample Name   | ARC-ME-AC-A   | Position    | Vial 1 | Instrument Name | QTOF   | User Name              |                      |
| Inj Vol       | -1            | InjPosition |        | SampleType      | Sample | IRM Calibration Status | Success              |
| Data Filename | ARC-ME-AC-A.d | ACQ Method  |        | Comment         |        | Acquired Time          | 4/16/2018 4:11:48 PM |

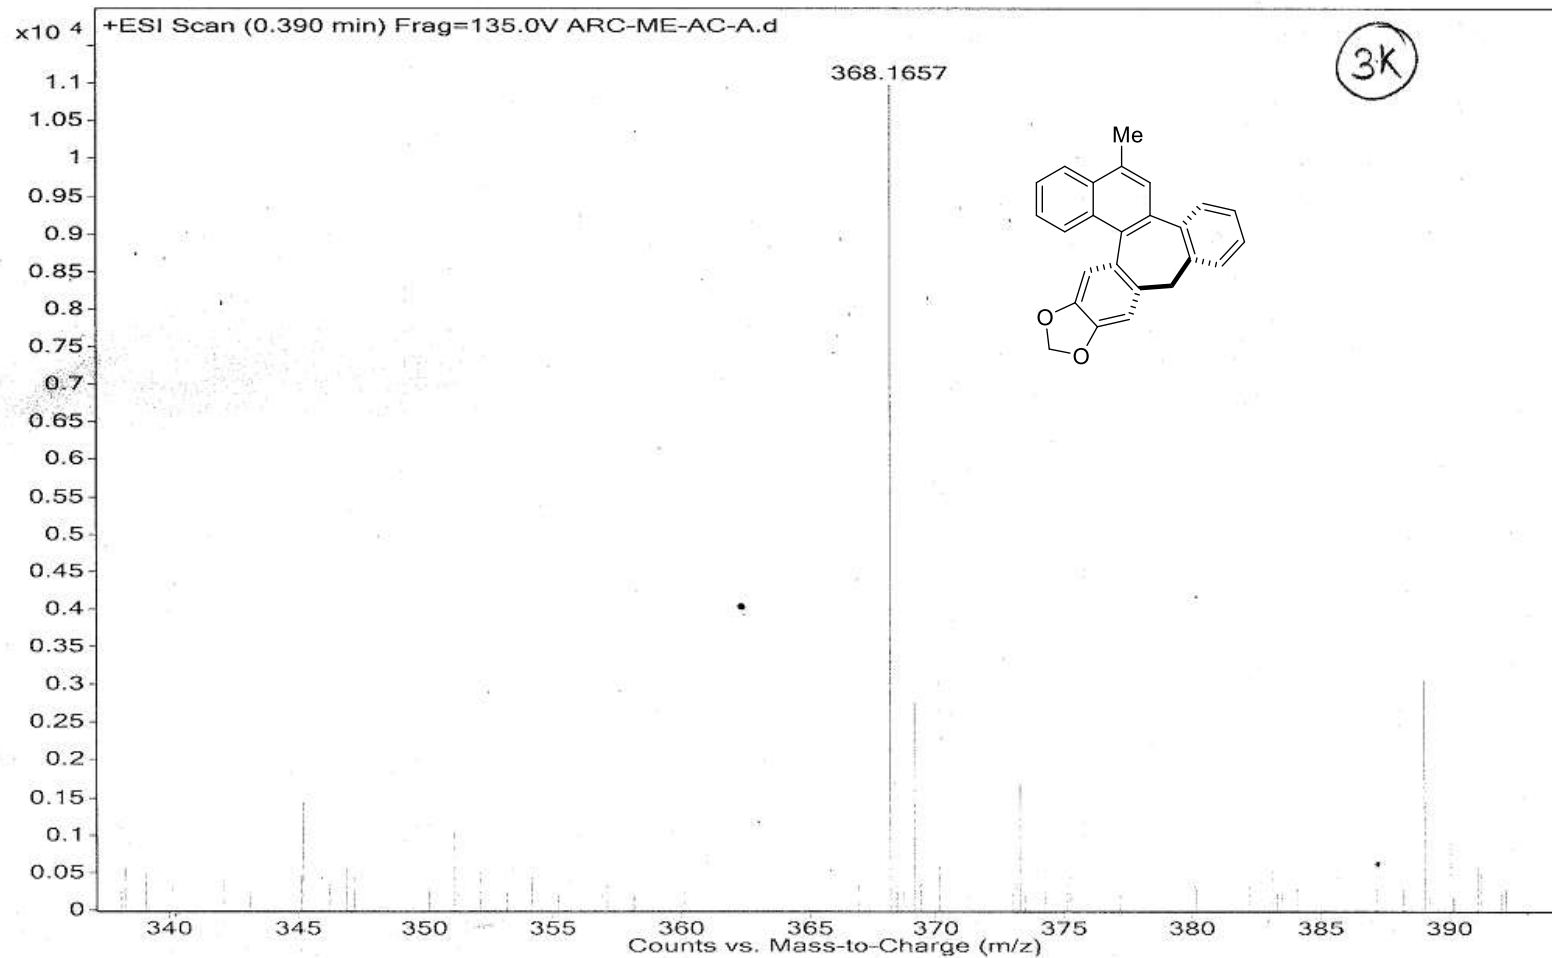

# HRMS Spectrum of 4k

|               |                 |             |        |                 |        |                        |                      |
|---------------|-----------------|-------------|--------|-----------------|--------|------------------------|----------------------|
| Sample Name   | ARC-ME-AC-U-A   | Position    | Vial 1 | Instrument Name | QTOF   | User Name              |                      |
| Inj Vol       | -1              | InjPosition |        | SampleType      | Sample | IRM Calibration Status | Success              |
| Data Filename | ARC-ME-AC-U-A.d | ACQ Method  |        | Comment         |        | Acquired Time          | 4/16/2018 4:15:45 PM |

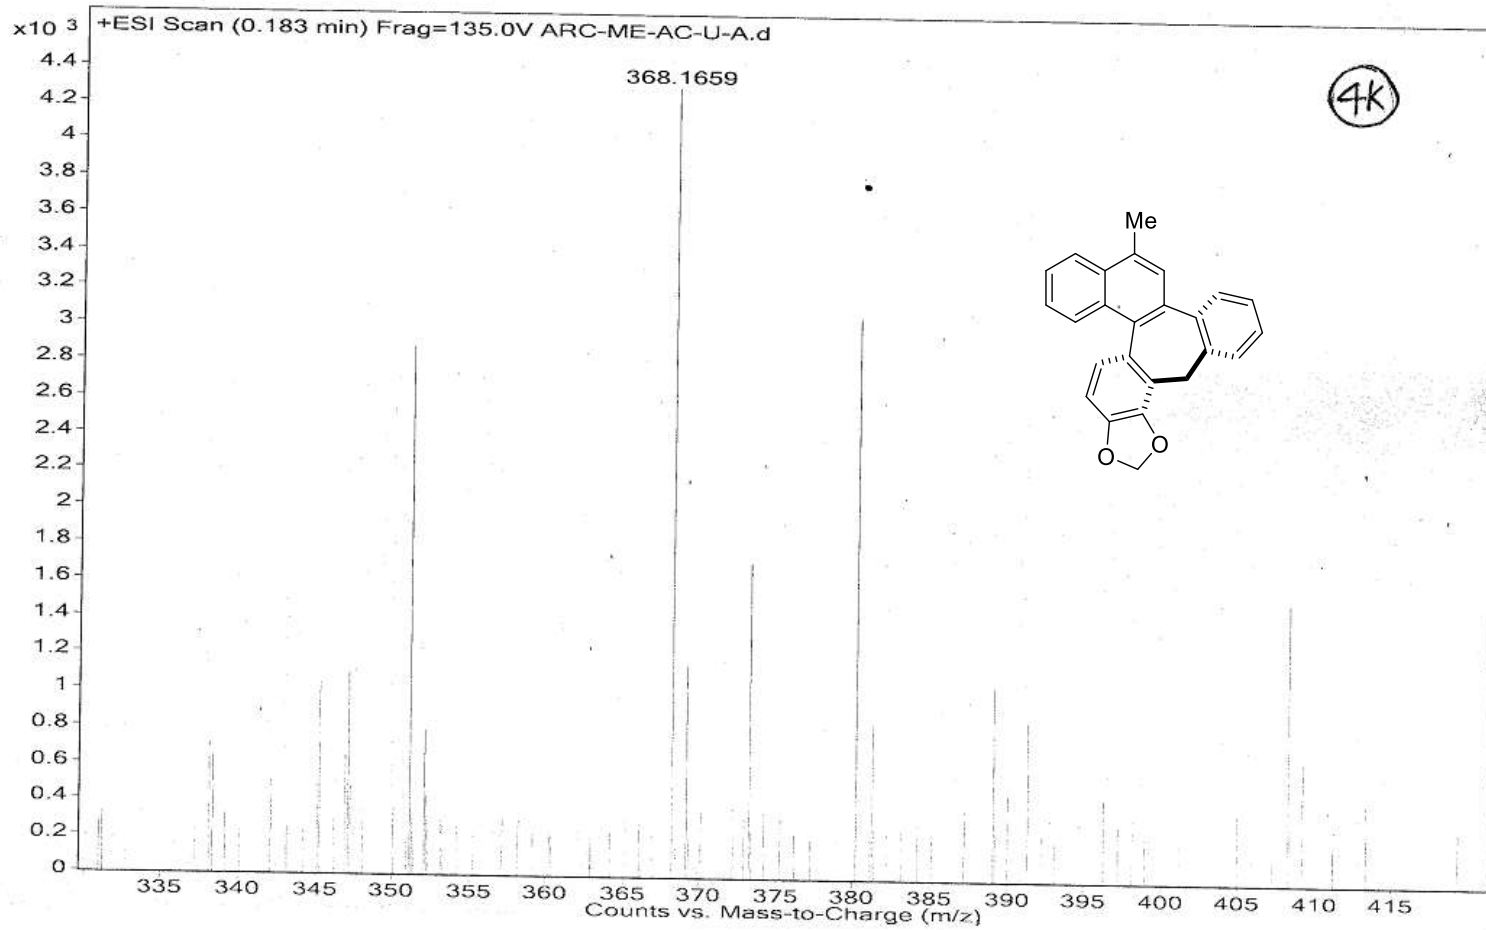

# HRMS Spectrum of 31

Sample Name  
Inj Vol  
Data Filename

Position  
InjPosition  
ACQ Method

Instrument Name  
SampleType  
Comment

User Name  
IRM Calibration Status  
Acquired Time

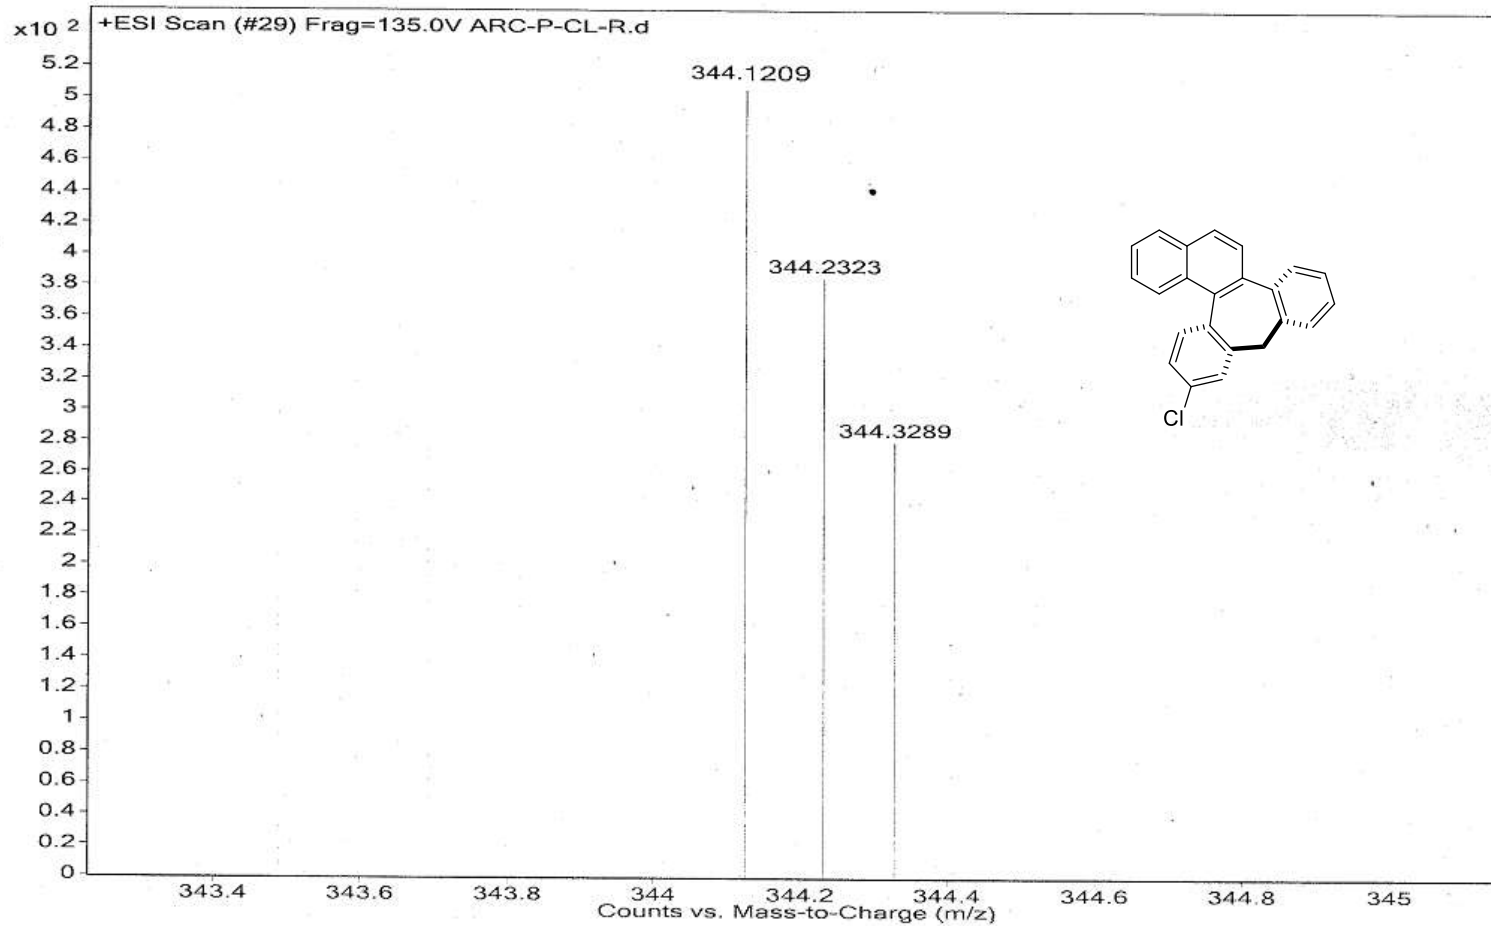

# HRMS Spectrum of 3m

|                    |                    |                               |         |                        |                                 |
|--------------------|--------------------|-------------------------------|---------|------------------------|---------------------------------|
| <b>Sample Name</b> | SAMPLE             | <b>Position</b>               | P1-A4   | <b>Instrument Name</b> | Instrument 1                    |
| <b>User Name</b>   |                    | <b>Inj Vol</b>                | 20      | <b>InjPosition</b>     |                                 |
| <b>Sample Type</b> | Sample             | <b>IRM Calibration Status</b> | Success | <b>Data Filename</b>   | ARC-OME-H-PH.d                  |
| <b>ACQ Method</b>  | ESI ALS 100-1000.m | <b>Comment</b>                |         | <b>Acquired Time</b>   | 28-10-2019 16:36:58 (UTC+05:30) |

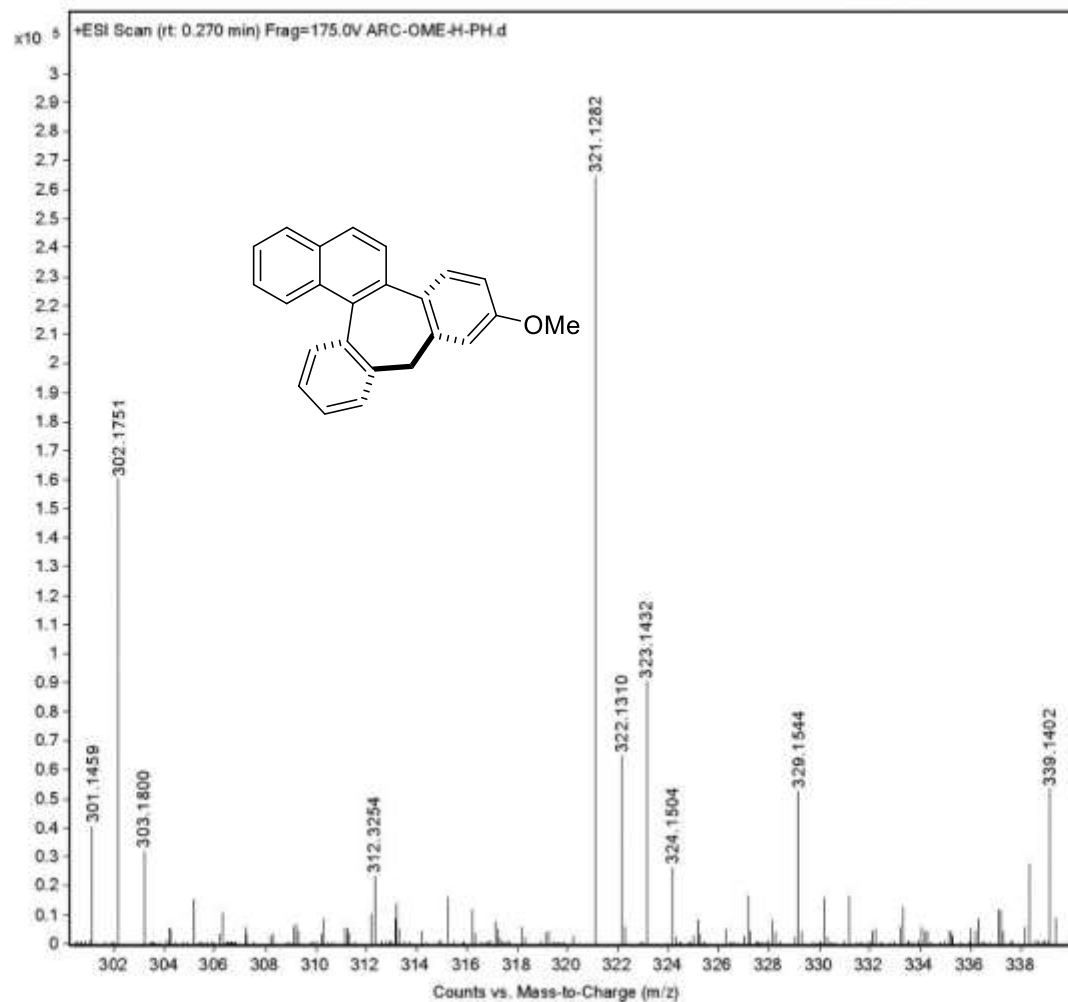

# HRMS Spectrum of 3n

Sample Name  
User Name  
Sample Type  
ACQ Method

SAMPLE  
Sample  
ESI ALS 100-1000.m

Position P1-A5  
Inj Vol 20  
IRM Calibration Status Success  
Comment

Instrument Name Instrument 1  
InjPosition  
Data Filename ARC-OME-ME-PH.d  
Acquired Time 28-10-2019 16:38:47 (UTC+05:30)

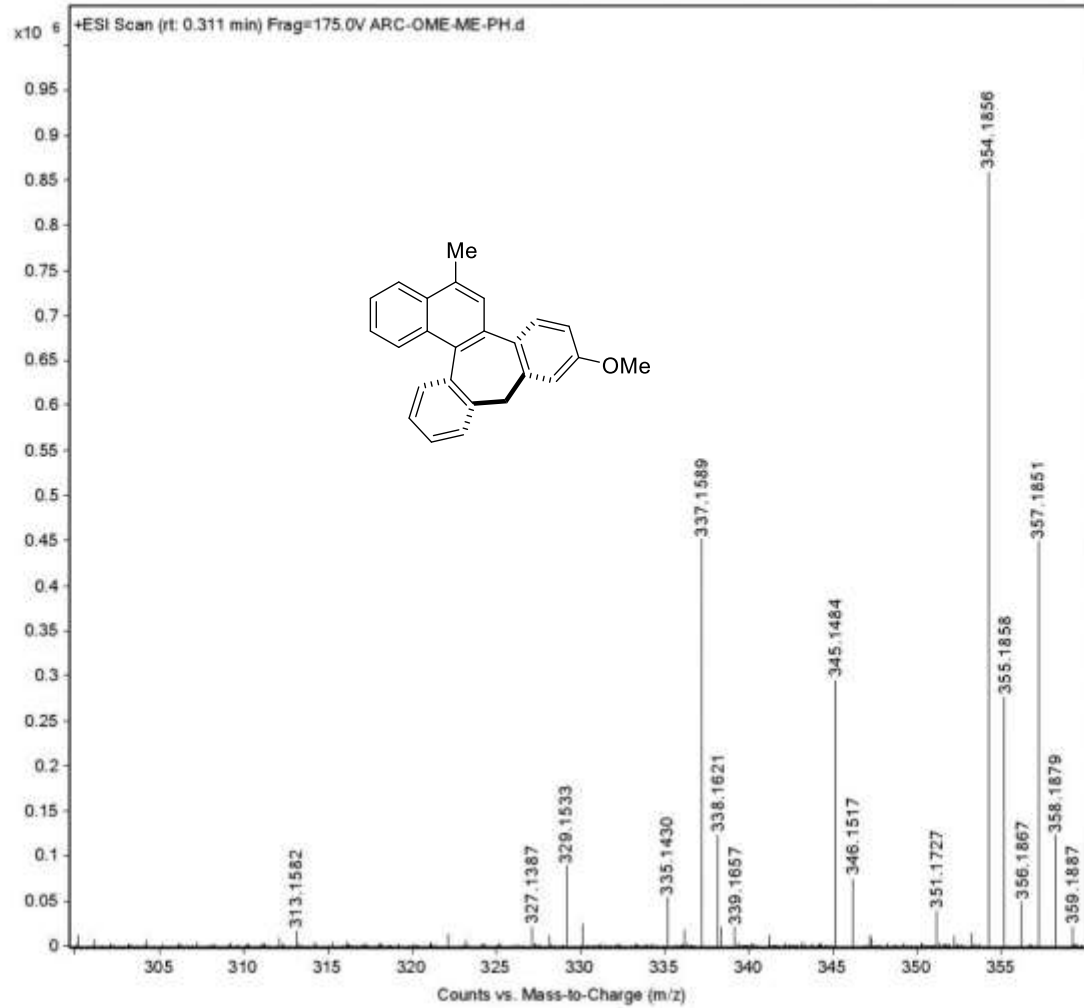

# HRMS Spectrum of 3o

**Sample Name**  
**User Name**  
**Sample Type**  
**ACQ Method**

SAMPLE  
Sample  
ESI ALS 100-1000.m

**Position** P1-A2  
**Inj Vol** 20  
**IRM Calibration Status** Success  
**Comment**

**Instrument Name** Instrument 1  
**InjPosition**  
**Data Filename** ARC-PH-H.d  
**Acquired Time** 28-10-2019 16:33:14 (UTC+05:30)

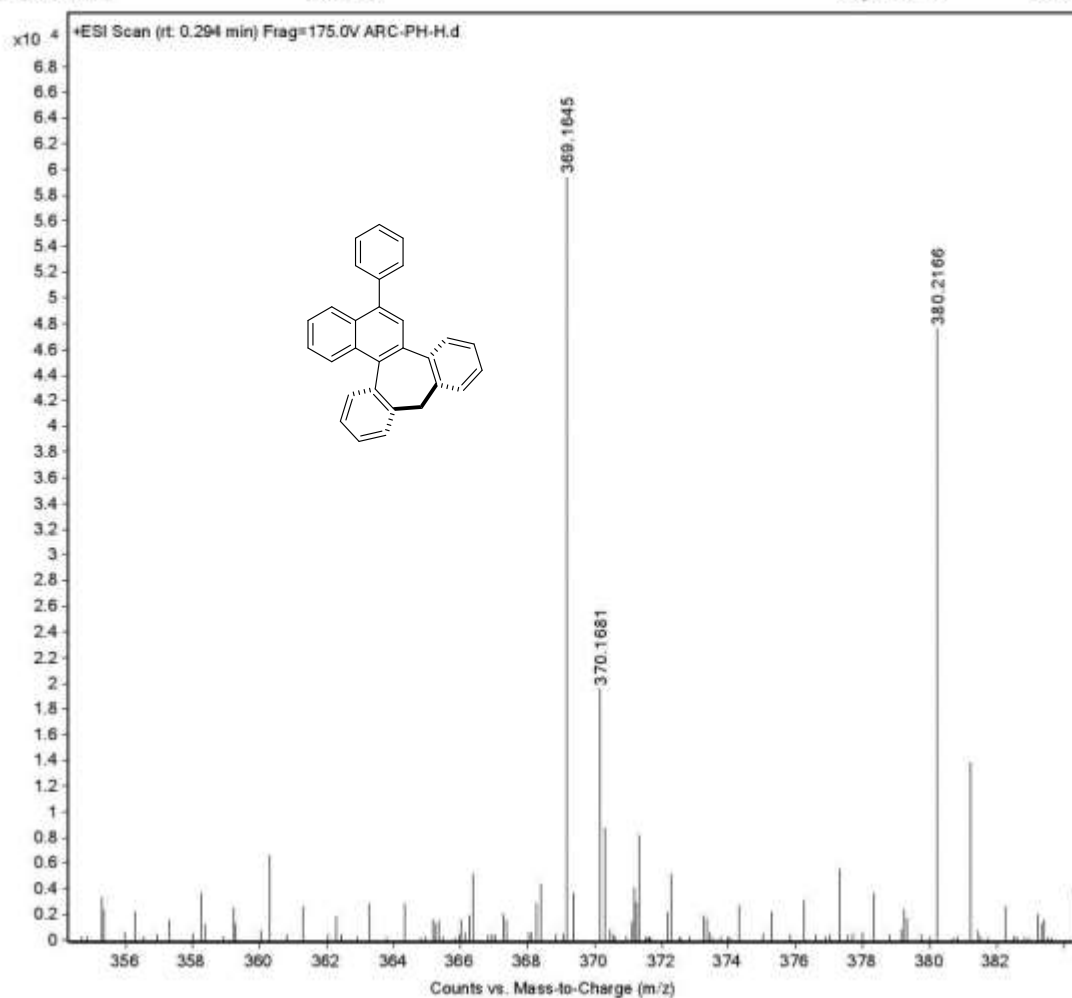

# HRMS Spectrum of 3p

**Sample Name**  
**User Name**  
**Sample Type**  
**ACQ Method**

SAMPLE  
Sample  
ESI ALS 100-1000.m

**Position** P1-A3  
**Inj Vol** 20  
**IRM Calibration Status** Success  
**Comment**

**Instrument Name** Instrument 1  
**InjPosition**  
**Data Filename** ARC-PH-ME.d  
**Acquired Time** 28-10-2019 16:35:07 (UTC+05:30)

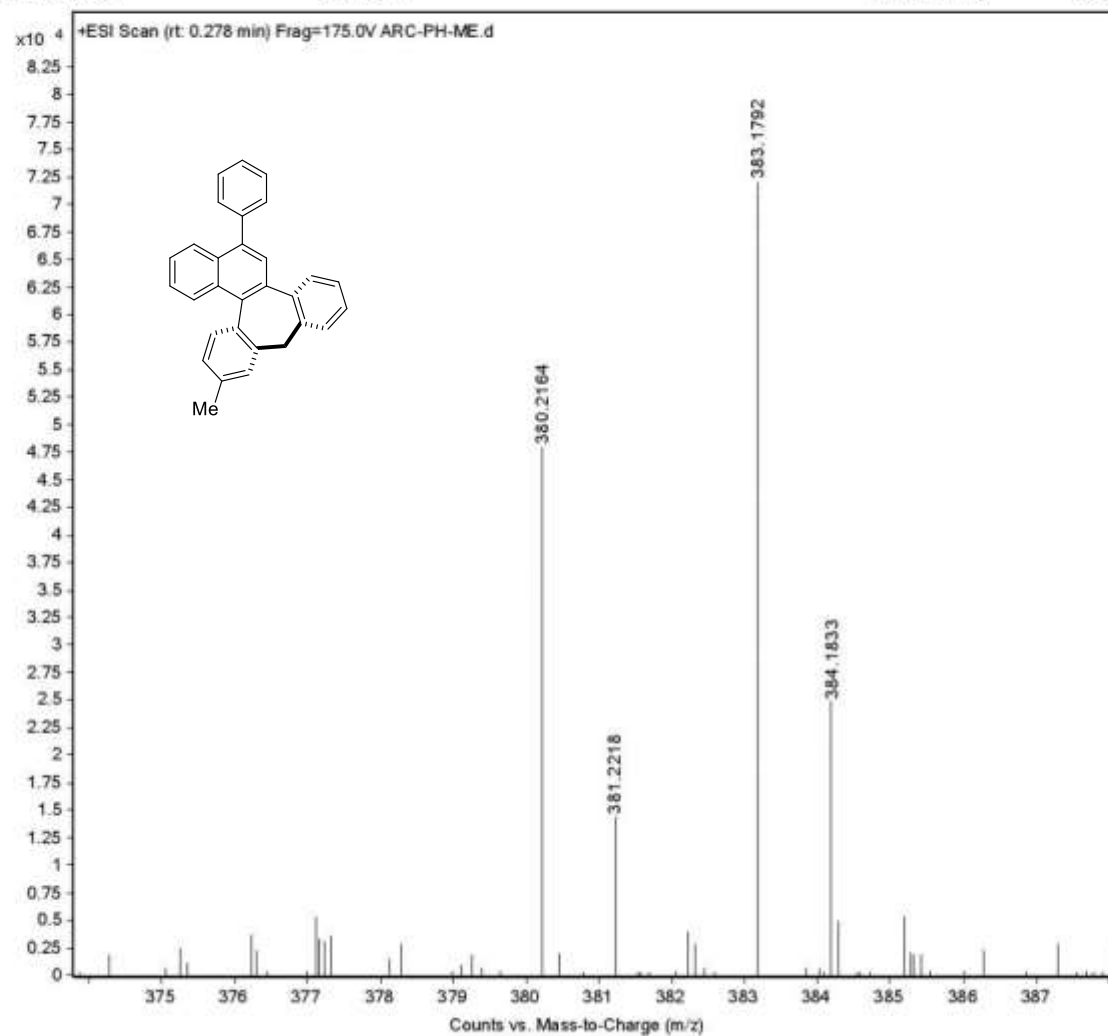

# HRMS Spectrum of 3q

**Sample Name**  
**User Name**  
**Sample Type**  
**ACQ Method**

H-NAP  
Sample  
ESI ALS 100-500.m

**Position** P1-A9  
**Inj Vol** 20  
**IRM Calibration Status** Success  
**Comment**

**Instrument Name** Instrument 1  
**InjPosition**  
**Data Filename** H-NAP.d  
**Acquired Time** 11-11-2019 16:34:53 (UTC+05:30)

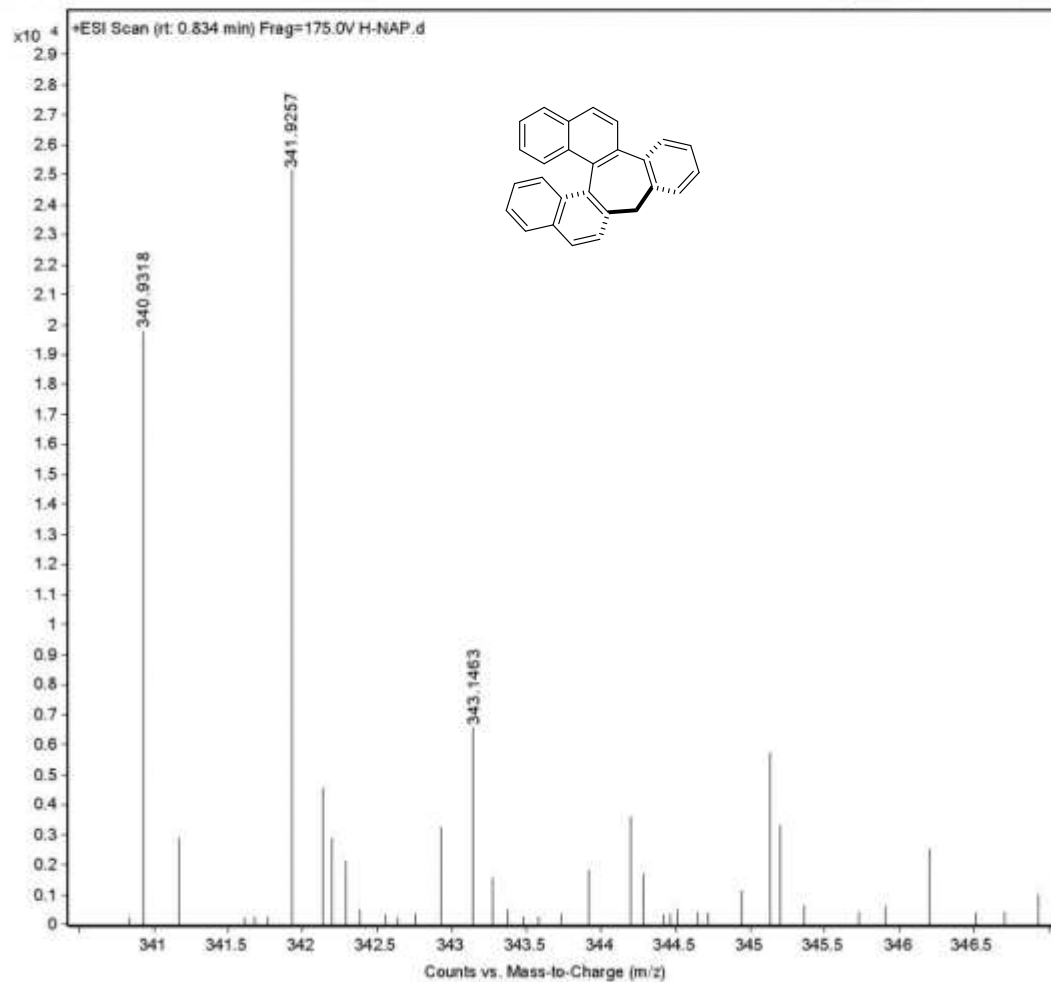



# HRMS Spectrum of 4q

|                    |                   |                               |         |                        |                                 |
|--------------------|-------------------|-------------------------------|---------|------------------------|---------------------------------|
| <b>Sample Name</b> | HNAP-6            | <b>Position</b>               | P1-A2   | <b>Instrument Name</b> | Instrument 1                    |
| <b>User Name</b>   |                   | <b>Inj Vol</b>                | 20      | <b>InjPosition</b>     |                                 |
| <b>Sample Type</b> | Sample            | <b>IRM Calibration Status</b> | Success | <b>Data Filename</b>   | HNAP-6.d                        |
| <b>ACQ Method</b>  | ESI ALS 100-600.m | <b>Comment</b>                |         | <b>Acquired Time</b>   | 05-11-2020 17:03:20 (UTC+05:30) |

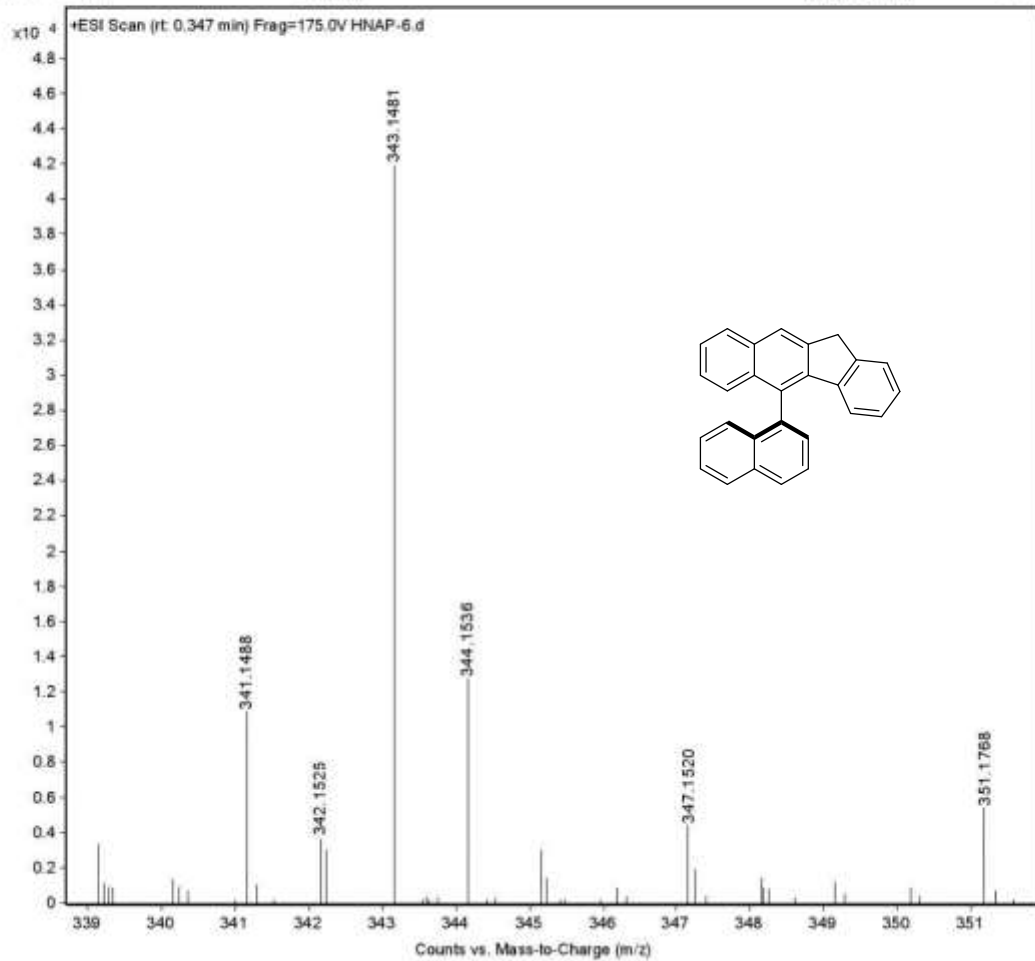

# HRMS Spectrum of 3r and 4r

|                    |                    |                               |         |                        |                                 |
|--------------------|--------------------|-------------------------------|---------|------------------------|---------------------------------|
| <b>Sample Name</b> | P-2ND-ME-4         | <b>Position</b>               | P1-B9   | <b>Instrument Name</b> | Instrument 1                    |
| <b>User Name</b>   |                    | <b>Inj Vol</b>                | 20      | <b>InjPosition</b>     |                                 |
| <b>Sample Type</b> | Sample             | <b>IRM Calibration Status</b> | Success | <b>Data Filename</b>   | P-2ND-ME-4.d                    |
| <b>ACQ Method</b>  | ESI ALS 100-1000.m | <b>Comment</b>                |         | <b>Acquired Time</b>   | 03-11-2020 10:57:15 (UTC+05:30) |

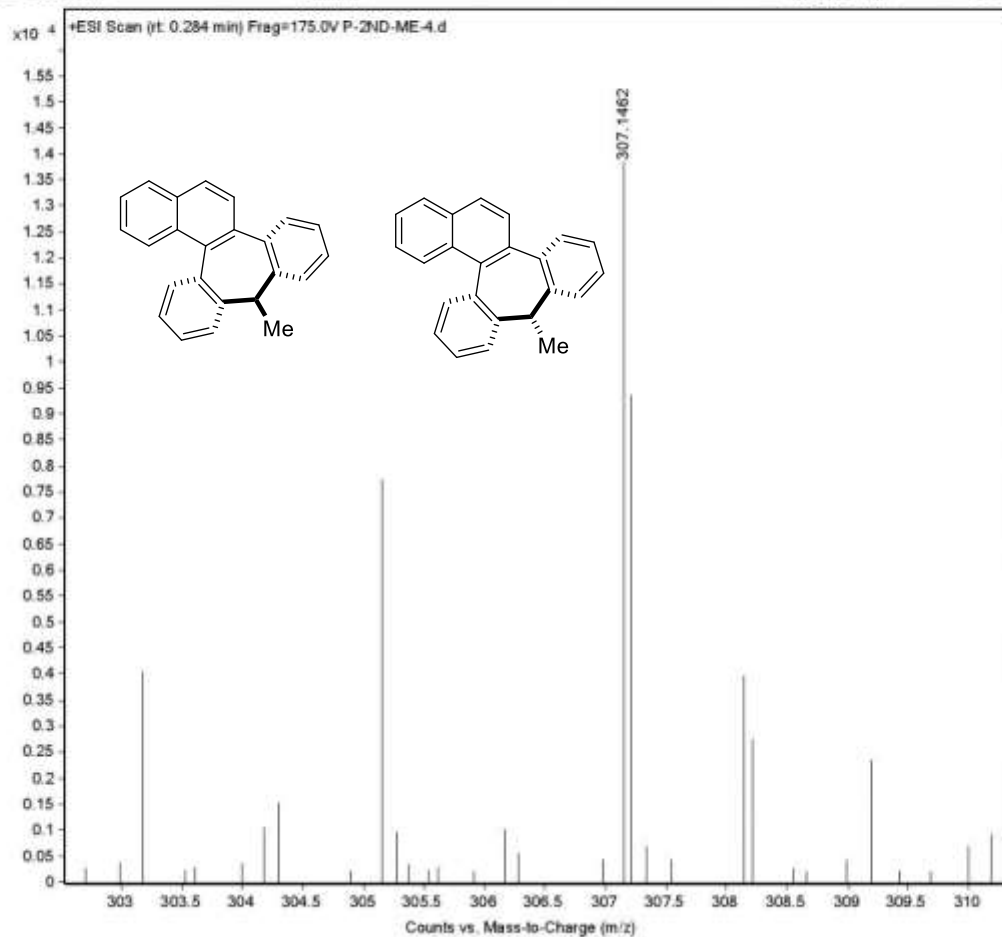

# HRMS Spectrum of 3t

**Sample Name**  
**User Name**  
**Sample Type**  
**ACQ Method**

SAMPLE  
Sample  
ESI ALS 100-500.m

**Position**  
**Inj Vol**  
**IRM Calibration Status**  
**Comment**

P1-D1  
20  
Success

**Instrument Name**  
**InjPosition**  
**Data Filename**  
**Acquired Time**

Instrument 1  
PH-GR-P-2.d  
12-02-2021 18:21:43 (UTC+05:30)

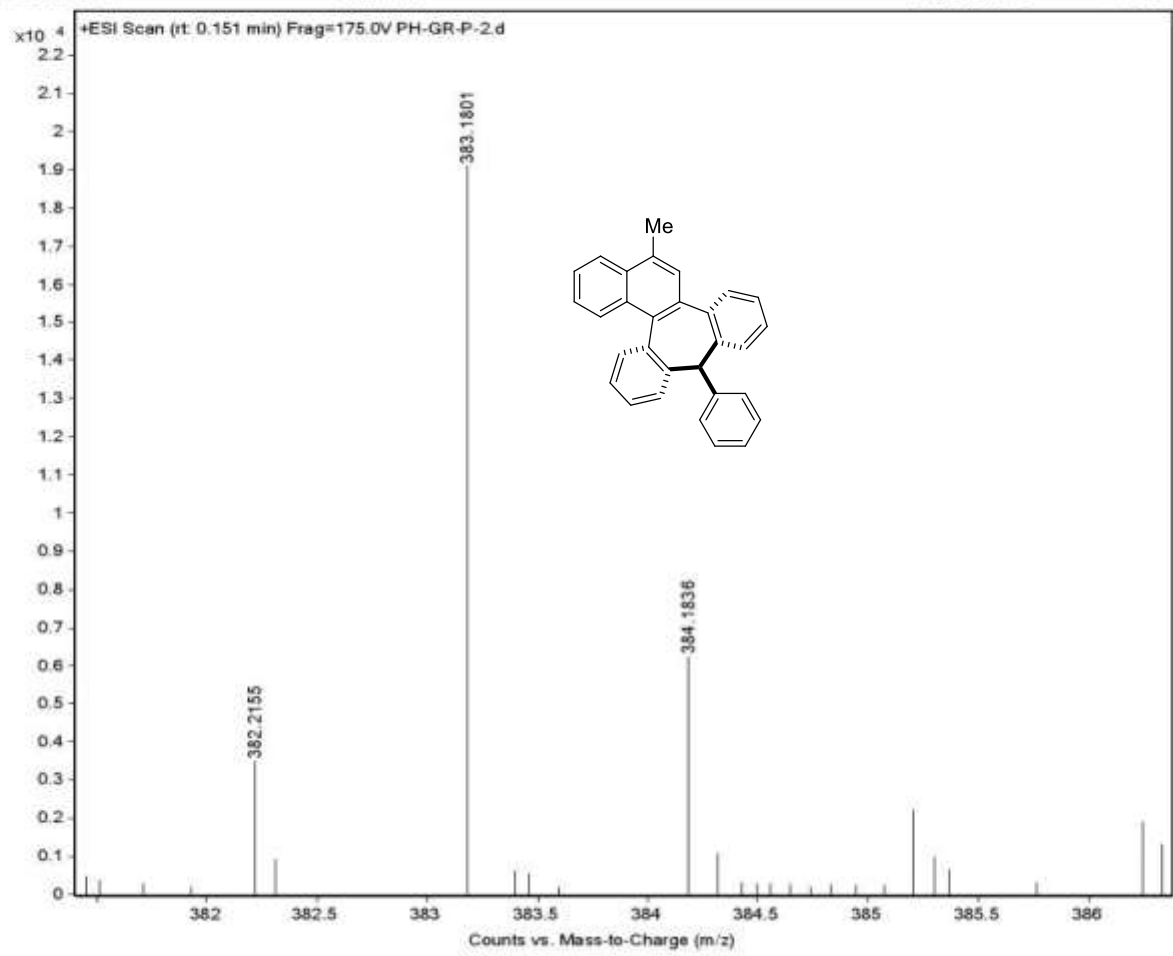

# HRMS Spectrum of 3u and 4u

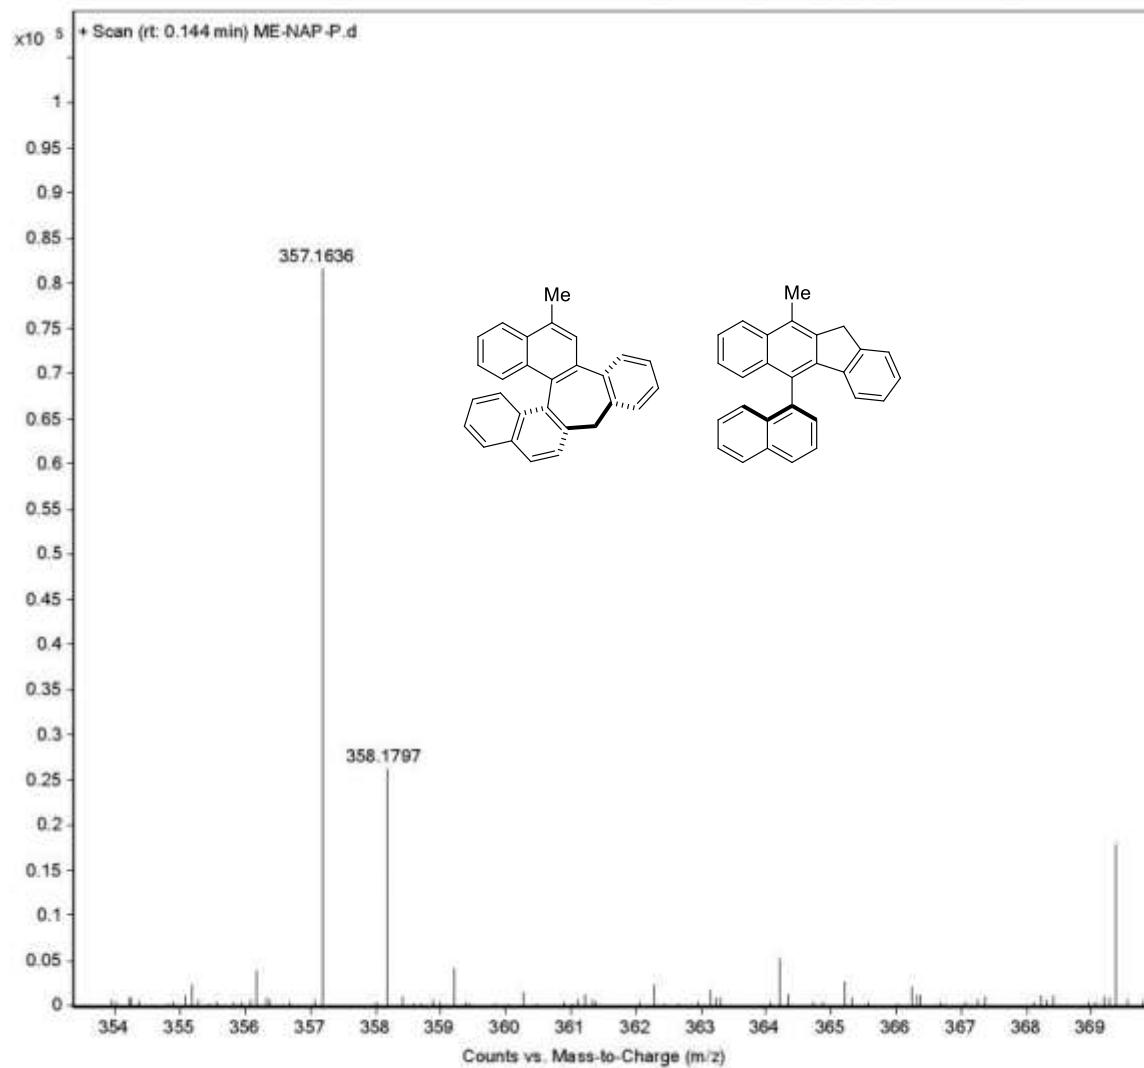

Supplement: d1ob00057h1.pdf [file d1ob00057h1.pdf]
