# Supplementary material for: Synthesis of dibenzocyclohepta[1,2-a]naphthalene derivatives from phenylacetaldehyde and alkynyl benzyl alcohols via sequential electrophilic addition and double Friedel–Crafts reactions
Source: Royal Society of Chemistry journal article supplement (doi:10.1039/d1ob00057h), 2021-01-01
Supplement: d1ob00057h2.pdf [file d1ob00057h2.pdf]

## Supporting Information

### Synthesis of dibenzo cyclohepta[1,2-a]naphthalene derivatives from phenylacetaldehyde and alkynyl benzyl alcohols via sequential electrophilic addition and double Friedel-Crafts reactions

*Archana K. Sahu, Ramanjaneyulu Unnava, Bipin K. Behera and Anil K. Saikia*

#### Table of content

|                                                                                     |         |
|-------------------------------------------------------------------------------------|---------|
| 1. Experimental section                                                             | S2-S14  |
| 2. <sup>1</sup> H and <sup>13</sup> C spectra of all new compounds                  | S15-70  |
| 3. The crystal parameters and ORTEP diagram of compounds <b>3a</b> & <b>3c</b>      | S71-S74 |
| 4. DFT energy optimized structures of compounds <b>3a</b> , <b>3q</b> and <b>4q</b> | S75-S77 |
| 5. HPLC spectra of compounds <b>3a</b> , <b>3f</b> , <b>3q</b> and <b>4q</b>        | S78-S81 |
| 6. References                                                                       | S82     |

## EXPERIMENTAL SECTION

**General Information** All the reagents were of reagent grade (AR grade) and were used as purchased without further purification. Silica gel (60-120 mesh size) was used for column chromatography. Reactions were monitored by TLC on silica gel GF<sub>254</sub> (0.25 mm). Melting points were recorded with a Büchi B-540 melting point apparatus. Fourier transform-infra red (FTIR) spectra were recorded on Nicolet Impact-410 instrument either as neat liquid or KBr pellets. NMR spectra were recorded in CDCl<sub>3</sub> with tetramethylsilane as the internal standard for <sup>1</sup>H (400 MHz) or <sup>13</sup>C (100 MHz). Chemical shifts ( $\delta$ ) are reported in ppm and spin-spin coupling constants (*J*) are given in Hz. HRMS spectra were recorded using Q-TOF premier mass spectrometer. The ratio of enantiomers was determined by HPLC analysis using Chiracel OD columns on Waters 1525 Binary HPLC system. The starting material *ortho*-alkynyl alcohols (**1a**, **1b**, **1d**, **1h**, **1i**),<sup>1</sup> **1j**,<sup>2</sup> **1k**,<sup>3</sup> **1l**,<sup>4</sup> **1m**<sup>5</sup>, and **2c**<sup>6</sup> were prepared as per the literature procedure and the spectroscopic data are in good agreement with the literature one.

General Experimental procedure for synthesis of *o*-alkynyl benzyl alcohols (**1**):

To a stirred solution of substituted 2-iodobenzylalcohol (1.0 mmol, 1.0 equiv.), palladium (II) chloride (2 mol%, 0.02 equiv.), triphenylphosphine (4 mol%, 0.04 equiv.) and copper(I) iodide (8 mol%, 0.08 equiv.) in triethylamine (4 mL) was added 1-ethynyl-benzene derivatives (1.2 mmol, 1.2 equiv.) under nitrogen atmosphere. Then, the reaction was heated at 60 °C for 12h. After completion of the reaction, the solvent was removed under reduced pressure and diluted with saturated NH<sub>4</sub>Cl solution. The organic layer was extracted with EtOAc (3x20 mL). The organic layer was further washed with brine solution for 2-3 times. The combined organic layers were dried over Na<sub>2</sub>SO<sub>4</sub> and concentrated in rotary evaporator. The crude was subjected to column chromatography over silica gel to give the *o*-alkynyl benzyl alcohols (**1**).

### **Experimental procedure for synthesis of (2-((2-methoxyphenyl)ethynyl)phenyl)methanol**

#### **(1c):**

To a stirred solution of (2-iodophenyl)methanol (234 mg, 1.0 mmol), palladium(II) chloride (3.5 mg, 2 mol%), triphenylphosphine (10.4 mg, 4 mol%) and copper(I) iodide (15 mg, 8 mol%) in triethylamine (4 mL) was added 1-ethynyl-2-methoxybenzene (158 mg, 1.2 mmol) under nitrogen atmosphere. Then, the reaction was heated at 60 °C for 12h. After completion of the reaction, the solvent was removed under reduced pressure and diluted with saturated NH<sub>4</sub>Cl solution. The organic layer was extracted with EtOAc (3x20 mL). The organic layer was further washed with brine solution for 2-3 times. The combined organic layers were dried over Na<sub>2</sub>SO<sub>4</sub> and concentrated in rotary evaporator. The crude was subjected to column chromatography over silica gel to give the (2-((2-methoxyphenyl)ethynyl)phenyl)methanol (**1c**).

Colorless oil; *R<sub>f</sub>* (hexane/EtOAc 5:1) 0.50; yield 209 mg, 88%; <sup>1</sup>H NMR (400 MHz, CDCl<sub>3</sub>) δ 3.68 (t, *J* = 7.2 Hz, 1 H), 3.92 (s, 3 H), 4.83 (d, *J* = 7.2 Hz, 2 H), 6.90 (d, *J* = 8.0 Hz, 1 H), 6.96 (t, *J* = 7.6 Hz, 1 H), 7.25-7.36 (m, 4 H), 7.48 (dd, *J* = 7.6 and 1.6 Hz, 1 H), 7.54 (dd, *J* = 8.0 and 2.4 Hz, 1 H); <sup>13</sup>C NMR (100 MHz, CDCl<sub>3</sub>) δ 55.9, 64.9, 90.8, 91.9, 110.7, 112.3, 120.9, 122.3, 127.8, 128.3, 128.7, 130.2, 132.0, 132.7, 143.5, 160.2; HRMS (ESI) calcd. for C<sub>16</sub>H<sub>15</sub>O<sub>2</sub> (M + H)<sup>+</sup> 239.1067, found 239.1066.

#### **Methyl 4-((2-(hydroxymethyl)phenyl)ethynyl)benzoate (1e):**

Colorless solid; *R<sub>f</sub>* (hexane/EtOAc 5:1) 0.40; mp 108-110 oC; yield 220 mg, 83%; <sup>1</sup>H NMR (600 MHz, CDCl<sub>3</sub>) δ 2.06 (t, *J* = 5.4 Hz, 1 H), 3.96 (s, 3 H), 4.95 (d, *J* = 6.6 Hz, 2 H), 7.33 (dt, *J* = 7.6 and 1.2 Hz, 1 H), 7.42 (dt, *J* = 7.6 and 1.2 Hz, 1 H), 7.54 (d, *J* = 7.6 Hz, 1 H), 7.58 (dd, *J* = 7.6 and 1.0 Hz, 1 H), 7.61 (d, *J* = 8.6 Hz, 1 H), 8.06 (d, *J* = 8.6 Hz, 1 H); <sup>13</sup>C NMR (150 MHz, CDCl<sub>3</sub>)

δ52.5, 64.1, 89.9, 93.5, 121.0, 127.5, 127.8, 129.5, 129.8, 130.0, 131.7, 132.6, 142.9, 166.7; HRMS (ESI) calcd. for C<sub>17</sub>H<sub>15</sub>O<sub>3</sub> (M + H)<sup>+</sup> 267.1016, found 267.1034.

**(2-((3-Methoxyphenyl)ethynyl)phenyl)methanol (1f):**

Colorless oil; R<sub>f</sub> (hexane/EtOAc 5:1) 0.50; yield 207 mg, 87%; <sup>1</sup>H NMR (400 MHz, CDCl<sub>3</sub>) δ 2.69 (s, 1 H), 3.78 (s, 3 H), 4.87 (s, 2 H), 6.88 (dd, *J* = 8.4 and 2.4 Hz, 1 H), 7.03 (s, 1 H), 7.10 (d, *J* = 7.6 Hz, 1 H), 7.20-7.25 (m, 2 H), 7.31 (t, *J* = 7.6 Hz, 1 H), 7.45 (d, *J* = 7.6 Hz, 1 H), 7.50 (d, *J* = 7.6 Hz, 1 H); <sup>13</sup>CNMR (100 MHz, CDCl<sub>3</sub>) δ 55.4, 63.8, 86.7, 94.2, 115.2, 116.4, 121.2, 124.0, 124.3, 127.2, 127.5, 128.9, 129.6, 132.2, 142.7, 159.5; HRMS (ESI) calcd. for C<sub>16</sub>H<sub>15</sub>O<sub>2</sub> (M + H)<sup>+</sup> 239.1067, found 239.1067.

**(2-(Benzo[*d*][1,3]dioxol-5-ylethynyl)phenyl)methanol (1g):**

Colorless oil; R<sub>f</sub> (hexane/EtOAc 5:1) 0.60; yield 216 mg, 86%; <sup>1</sup>H NMR (400 MHz, CDCl<sub>3</sub>) δ 2.24 (bs, 1 H), 4.87 (s, 2 H), 5.98 (s, 2 H), 6.78 (d, *J* = 8.0 Hz, 1 H), 6.96 (s, 1 H), 7.05 (dd, *J* = 8.0 and 1.5 Hz, 1 H), 7.25 (t, *J* = 7.4 Hz, 1 H), 7.33 (t, *J* = 7.4 Hz, 1 H), 7.45 (d, *J* = 7.6 Hz, 1 H), 7.50 (d, *J* = 7.6 Hz, 1 H); <sup>13</sup>CNMR (100 MHz, CDCl<sub>3</sub>) δ 64.2, 85.4, 94.4, 101.6, 108.8, 111.7, 116.3, 121.6, 126.5, 127.4, 127.7, 128.7, 132.2, 142.6, 147.8, 148.4; HRMS (ESI) calcd. for C<sub>16</sub>H<sub>13</sub>O<sub>3</sub> (M + H)<sup>+</sup> 253.0859, found 253.0839.

**1-(2-(Naphthalen-1-ylethynyl)phenyl)ethanol (1n):**

Brown solid; R<sub>f</sub> (hexane/EtOAc 4:1) 0.50; mp 105-107 °C; yield 244 mg, 90%; <sup>1</sup>H NMR (400 MHz, CDCl<sub>3</sub>) δ 1.64 (d, *J* = 6.4 Hz, 3 H), 2.19 (bs, 1 H), 5.53-5.59 (m, 1 H), 5.98 (s, 2 H), 7.30 (dt, *J* = 7.6 and 1.5 Hz, 1 H), 7.41 (dt, *J* = 7.6 and 1.5 Hz, 1 H), 7.47 (t, *J* = 7.6 Hz, 1 H), 7.54 (t, *J* = 7.6 Hz, 1 H), 7.58-7.65 (m, 3 H), 7.76 (d, *J* = 7.6 Hz, 1 H), 7.87 (t, *J* = 7.6 Hz, 2 H), 8.40 (d, *J* = 7.6 Hz, 1 H); <sup>13</sup>CNMR (100 MHz, CDCl<sub>3</sub>) δ 24.5, 68.9, 92.0, 92.8, 120.8, 121.0, 125.0, 125.5,

126.3, 126.7, 127.2, 127.4, 128.6, 129.2, 129.3, 130.7, 132.7, 133.4, 133.5, 147.8; HRMS (ESI) calcd. for C<sub>20</sub>H<sub>17</sub>O (M + H)<sup>+</sup> 273.1274, found 273.1284.

**Experimental procedure for synthesis of 9*H*-dibenzo[3,4:6,7]cyclohepta[1,2-*a*]naphthalene**

**(3a):**

To a solution of (2-(phenylethynyl)phenyl)methanol (100 mg, 0.5 mmol) and phenylacetaldehyde (66 mg, 0.55 mmol) in toluene was added BF<sub>3</sub>·OEt<sub>2</sub> (0.12 mL, 0.5 mmol) dropwise at 0 °C under nitrogen atmosphere. The reaction was stirred at 0 °C for 15 minutes and then brought to room temperature over a period of 15 minutes and then heating at 100 °C for 1h. After completion of the reaction, the solvent was removed under reduced pressure and diluted with saturated NaHCO<sub>3</sub> solution. Then the organic layer was extracted with EtOAc (3x10 mL). The organic layer was further washed with brine solution for 2-3 times. The combined organic layers were dried over Na<sub>2</sub>SO<sub>4</sub> and concentrated in rotary evaporator. The crude was subjected to column chromatography over silica gel eluted with hexane to give the 9*H*-dibenzo[3,4:6,7]cyclohepta[1,2-*a*]naphthalene.

Colorless solid; *R<sub>f</sub>* (hexane) 0.60; mp 75-77 °C; yield 102 mg, 70%; <sup>1</sup>H NMR (400 MHz, CDCl<sub>3</sub>) δ 3.80 (d, *J<sub>ab</sub>* = 3.6 Hz, 2 H), 7.33-7.35 (m, 1 H), 7.40-7.43 (m, 4 H), 7.51-7.53 (m, 1 H), 7.61-7.68 (m, 3 H), 7.80-7.82 (m, 1 H), 7.89-7.91 (m, 1 H), 8.05-8.10 (m, 2 H), 8.32 (d, *J* = 8.0 Hz, 1 H); <sup>13</sup>CNMR (100 MHz, CDCl<sub>3</sub>) δ 40.7, 125.2, 126.0, 126.3, 126.5, 126.6, 126.7, 127.7, 127.9, 128.0, 128.1, 128.2, 128.3, 129.6, 132.0, 132.7, 133.4, 134.2, 135.8, 136.2, 138.2, 143.6, 144.4; HRMS (ESI) calcd. for C<sub>23</sub>H<sub>17</sub> (M + H)<sup>+</sup> 293.1325, found 293.1323.

**15-Methyl-9*H*-dibenzo[3,4:6,7]cyclohepta[1,2-*a*]naphthalene (3b):**

Colorless solid;  $R_f$  (hexane) 0.60; mp 74-76 °C; yield 76 mg, 50%;  $^1\text{H NMR}$  (400 MHz,  $\text{CDCl}_3$ )  $\delta$  2.80 (s, 3 H), 3.66 (d,  $J_{ab} = 2.8$  Hz, 2 H), 7.20 (t,  $J = 7.6$  Hz, 1 H), 7.24-7.32 (m, 4 H), 7.38 (d,  $J = 7.6$  Hz, 1 H), 7.44-7.50 (m, 2 H), 7.56 (t,  $J = 8.0$  Hz, 1 H), 7.63 (s, 1 H), 7.67-7.70 (m, 1 H), 8.08 (d,  $J = 8.4$  Hz, 1 H), 8.17 (d,  $J = 8.4$  Hz, 1 H);  $^{13}\text{CNMR}$  (100 MHz,  $\text{CDCl}_3$ )  $\delta$  20.0, 40.8, 124.4, 125.2, 125.9, 126.0, 126.4, 126.5, 126.6, 127.9, 128.0, 128.4, 128.9, 129.5, 132.2, 132.6, 132.9, 134.0, 134.3, 134.4, 135.8, 138.2, 143.7, 144.3; HRMS (ESI) calcd. for  $\text{C}_{24}\text{H}_{19}$  ( $\text{M} + \text{H}$ ) $^+$  307.1481, found 307.1488.

**7-Methyl-9H-dibenzo[3,4:6,7]cyclohepta[1,2-*a*]naphthalene (3c):**

Colorless solid;  $R_f$  (hexane) 0.70; mp 182-184 °C; yield 92 mg, 60%;  $^1\text{H NMR}$  (600 MHz,  $\text{CDCl}_3$ )  $\delta$  2.53 (d,  $J = 5.4$  Hz, 3 H), 3.79 (s, 2 H), 7.20 (d,  $J = 7.2$  Hz, 1 H), 7.36-7.39 (m, 1 H), 7.40-7.44 (m, 2 H), 7.45-7.48 (m, 1 H), 7.58-7.67 (m, 3 H), 7.82-7.85 (m, 1 H), 7.91-7.94 (m, 1 H), 8.04-8.08 (m, 2 H), 8.37 (t,  $J = 7.8$  Hz, 1 H);  $^{13}\text{CNMR}$  (150 MHz,  $\text{CDCl}_3$ )  $\delta$  21.3, 40.7, 125.9, 126.1, 126.2, 126.4, 126.6, 127.3, 127.7, 127.8, 127.9, 128.1, 128.3, 129.6, 131.3, 132.1, 132.6, 133.4, 135.8, 136.1, 137.9, 138.3, 143.7, 144.3; HRMS (ESI) calcd. for  $\text{C}_{24}\text{H}_{22}\text{N}$  ( $\text{M} + \text{NH}_4$ ) $^+$  324.1747, found 324.1755.

**7,15-Dimethyl-9H-dibenzo[3,4:6,7]cyclohepta[1,2-*a*]naphthalene (3d):**

Colorless solid;  $R_f$  (hexane) 0.70; mp 87-89 °C; yield 64 mg, 40%;  $^1\text{H NMR}$  (400 MHz,  $\text{CDCl}_3$ )  $\delta$  2.38 (s, 3 H), 2.81 (s, 3 H), 3.64 (s, 2 H), 7.03 (d,  $J = 7.6$  Hz, 1 H), 7.21 (s, 1 H), 7.27-7.32 (m, 3 H), 7.38 (d,  $J = 11.4$  Hz, 1 H), 7.47 (t,  $J = 6.8$  Hz, 1 H), 7.56 (t,  $J = 6.8$  Hz, 1 H), 7.63 (s, 1 H), 7.68-7.71 (m, 1 H), 8.08 (d,  $J = 8.0$  Hz, 1 H), 8.20 (d,  $J = 8.4$  Hz, 1 H);  $^{13}\text{CNMR}$  (100 MHz,  $\text{CDCl}_3$ )  $\delta$  20.0, 21.4, 40.9, 124.4, 125.8, 125.9, 126.1, 126.5, 126.6, 127.3, 127.9, 128.5, 129.0, 129.6, 131.5, 132.2, 132.6, 132.8, 133.7, 134.4, 135.8, 137.8, 138.4, 143.7, 144.2; HRMS (ESI) calcd. for  $\text{C}_{25}\text{H}_{24}\text{N}$  ( $\text{M} + \text{NH}_4$ ) $^+$  338.1903, found 338.1885.

**5-Methoxy-9H-dibenzo[3,4:6,7]cyclohepta[1,2-*a*]naphthalene (3e):**

Colorless solid;  $R_f$  (hexane/EtOAc 98:2) 0.50; mp 187-189 °C; yield 77 mg, 48%;  $^1\text{H}$  NMR (400 MHz,  $\text{CDCl}_3$ )  $\delta$  3.52 (s, 3 H), 3.53-3.63 (m, 2 H), 6.79 (d,  $J = 8.0$  Hz, 1 H), 7.02 (d,  $J = 7.2$  Hz, 1 H), 7.22-7.32 (m, 4 H), 7.40 (t,  $J = 8.0$  Hz, 1 H), 7.47 (t,  $J = 6.8$  Hz, 1 H), 7.70 (t,  $J = 8.4$  Hz, 2 H), 7.74 (d,  $J = 8.4$  Hz, 1 H), 7.90 (t,  $J = 8.4$  Hz, 2 H);  $^{13}\text{C}$  NMR (100 MHz,  $\text{CDCl}_3$ )  $\delta$  40.8, 55.4, 109.1, 119.0, 122.8, 125.6, 125.7, 126.5, 126.7, 127.8, 128.0, 128.2, 128.4, 129.2, 129.3, 131.7, 132.2, 132.6, 136.9, 138.6, 143.8, 146.7, 157.7; HRMS (ESI) calcd. for  $\text{C}_{24}\text{H}_{19}\text{O}$  ( $\text{M} + \text{H}$ ) $^+$  323.1430, found 323.1419.

**7-Methoxy-9H-dibenzo[3,4:6,7]cyclohepta[1,2-*a*]naphthalene (3f):**

Colorless solid;  $R_f$  (hexane) 0.40; mp 168-170 °C; yield 81 mg, 50%;  $^1\text{H}$  NMR (400 MHz,  $\text{CDCl}_3$ )  $\delta$  3.73-3.75 (m, 2 H), 3.91 (s, 3 H), 6.87-6.89 (m, 1 H), 7.05 (s, 1 H), 7.37-7.42 (m, 3 H), 7.53-7.61 (m, 3 H), 7.76-7.79 (m, 1 H), 7.85-7.87 (m, 1 H), 7.98-8.02 (m, 2 H), 8.26-8.29 (m, 1 H);  $^{13}\text{C}$  NMR (100 MHz,  $\text{CDCl}_3$ )  $\delta$  41.0, 55.4, 110.8, 111.8, 125.9, 126.2, 126.5, 126.7, 126.8, 127.5, 127.8, 127.9, 128.1, 128.3, 129.6, 132.1, 133.4, 133.7, 135.6, 136.0, 138.4, 143.3, 145.7, 159.7; HRMS (ESI) calcd. for  $\text{C}_{24}\text{H}_{19}\text{O}$  ( $\text{M} + \text{H}$ ) $^+$  323.1430, found 323.1438.

**6-Methoxy-9H-dibenzo[3,4:6,7]cyclohepta[1,2-*a*]naphthalene (3h):**

Colorless solid;  $R_f$  (hexane/EtOAc 98:2) 0.50; mp 124-126 °C; yield 77 mg, 48%;  $^1\text{H}$  NMR (400 MHz,  $\text{CDCl}_3$ )  $\delta$  3.61 (s, 2 H), 3.70 (s, 3 H), 6.85 (dd,  $J = 8.4$  and 2.4 Hz, 1 H), 7.08 (d,  $J = 2.0$  Hz, 1 H), 7.25-7.29 (m, 4 H), 7.44-7.52 (m, 2 H), 7.65-7.68 (m, 1 H), 7.75 (d,  $J = 8.4$  Hz, 1 H), 7.92 (d,  $J = 8.4$  Hz, 2 H), 8.23 (d,  $J = 8.0$  Hz, 1 H);  $^{13}\text{C}$  NMR (100 MHz,  $\text{CDCl}_3$ )  $\delta$  39.8, 55.5, 114.1, 118.0, 126.0, 126.3, 126.4, 126.6, 127.4, 127.6, 128.0, 128.2, 128.3, 129.6, 131.9, 133.4, 135.1, 135.7, 136.3, 137.3, 138.2, 144.0, 157.1; HRMS (ESI) calcd. for  $\text{C}_{24}\text{H}_{19}\text{O}$  ( $\text{M} + \text{H}$ ) $^+$  323.1430, found 323.1437.

**8-Methoxy-9H-dibenzo[3,4:6,7]cyclohepta[1,2-a]naphthalene (4h):**

Colorless solid;  $R_f$  (hexane/EtOAc 98:2) 0.55; mp 158-160 °C; yield 46 mg, 29%;  $^1\text{H}$  NMR (400 MHz,  $\text{CDCl}_3$ )  $\delta$  3.14 (d,  $J_{ab} = 12.5$  Hz, 1 H), 3.91 (s, 3 H), 4.39 (d,  $J_{ab} = 12.5$  Hz, 1 H), 6.90-6.93 (m, 1 H), 7.14-7.19 (m, 2 H), 7.28-7.34 (m, 2 H), 7.42-7.45 (m, 1 H), 7.47-7.56 (m, 2 H), 7.71-7.73 (m, 1 H), 7.80 (d,  $J = 8.4$  Hz, 1 H), 7.96 (d,  $J = 8.4$  Hz, 2 H), 8.21 (d,  $J = 8.4$  Hz, 1 H);  $^{13}\text{C}$  NMR (100 MHz,  $\text{CDCl}_3$ )  $\delta$  31.1, 56.1, 109.7, 125.1, 125.2, 125.9, 126.2, 126.5, 126.8, 127.8, 127.9, 128.0, 128.1, 128.2, 129.4, 132.0, 133.0, 133.3, 135.8, 135.9, 136.3, 138.6, 143.8, 155.5; HRMS (ESI) calcd. for  $\text{C}_{24}\text{H}_{19}\text{O}$  ( $\text{M} + \text{H}$ ) $^+$  323.1430, found 323.1428.

**7-Methoxy-15-methyl-9H-dibenzo[3,4:6,7]cyclohepta[1,2-a]naphthalene (3i):**

Colorless oil;  $R_f$  (hexane/EtOAc 98:2) 0.5; yield 81 mg, 48%;  $^1\text{H}$  NMR (400 MHz,  $\text{CDCl}_3$ )  $\delta$  2.79 (s, 3 H), 3.60-3.71 (m, 2 H), 3.83 (s, 3 H), 6.77 (dd,  $J = 8.8$  and 2.8 Hz, 1 H), 6.93 (d,  $J = 2.8$  Hz, 1 H), 7.25-7.32 (m, 3 H), 7.39 (d,  $J = 8.4$  Hz, 1 H), 7.45-7.49 (m, 1 H), 7.53-7.57 (m, 1 H), 7.62 (s, 1 H), 7.67-7.69 (m, 1 H), 8.08 (d,  $J = 8.0$  Hz, 1 H), 8.18 (t,  $d = 8.0$  Hz, 1 H);  $^{13}\text{C}$  NMR (100 MHz,  $\text{CDCl}_3$ )  $\delta$  19.9, 41.1, 55.5, 110.9, 111.8, 124.4, 125.8, 126.6, 126.7, 127.1, 127.9, 128.4, 128.9, 129.6, 132.3, 132.6, 133.5, 133.9, 134.1, 135.6, 138.4, 143.3, 145.6, 159.5; HRMS (ESI) calcd. for  $\text{C}_{25}\text{H}_{21}\text{O}$  ( $\text{M} + \text{H}$ ) $^+$  337.1587, found 337.1606.

**5-Methoxy-15-methyl-9H-dibenzo[3,4:6,7]cyclohepta[1,2-a]naphthalene (3j):**

Colorless solid;  $R_f$  (hexane/EtOAc 99:1) 0.60; mp 196-198 °C; yield 50 mg, 30%;  $^1\text{H}$  NMR (400 MHz,  $\text{CDCl}_3$ )  $\delta$  2.83 (s, 3 H), 3.55 (s, 3 H), 3.58-3.66 (m, 3 H), 6.82 (d,  $J = 8.2$  Hz, 1 H), 7.05 (d,  $J = 7.6$  Hz, 1 H), 7.27-7.34 (m, 3 H), 7.45 (t,  $J = 7.6$  Hz, 1 H), 7.55 (t,  $J = 7.6$  Hz, 1 H), 7.64 (s, 1 H), 7.75 (d,  $J = 7.6$  Hz, 2 H), 8.09 (d,  $J = 8.2$  Hz, 1 H);  $^{13}\text{C}$  NMR (100 MHz,  $\text{CDCl}_3$ )  $\delta$  19.9, 40.8, 55.4, 109.0, 119.0, 123.0, 124.1, 125.3, 125.6, 126.5, 126.7, 127.8, 128.9, 129.0, 129.1, 129.2,



130.9, 131.5, 131.7, 134.1, 136.5, 138.5, 143.8, 146.6, 157.7; HRMS (ESI) calcd. for C<sub>25</sub>H<sub>21</sub>O (M + H)<sup>+</sup> 337.1587, found 337.1607.

**5-Methyl-11*H*-benzo[4',5']naphtho[2'',1'':6',7']cyclohepta[1',2':4,5]benzo[1,2-*d*][1,3]dioxole (3k):**

Colorless solid; *R<sub>f</sub>* (hexane, eluted twice) 0.2; mp 102-104 °C; yield 44 mg, 25%; <sup>1</sup>H NMR (400 MHz, CDCl<sub>3</sub>) δ 2.80 (s, 3 H), 3.56 (s, 2 H), 5.87 (d, *J* = 1.2 Hz, 1 H), 6.00 (d, *J* = 1.2 Hz, 1 H), 6.88 (s, 1 H), 6.95 (s, 1 H), 7.29-7.32 (m, 3 H), 7.50 (t, *J* = 6.8 Hz, 1 H), 7.56 (t, *J* = 6.8 Hz, 1 H), 7.62 (s, 1 H), 7.69-7.71 (m, 1 H), 8.08 (d, *J* = 8.0 Hz, 1 H), 8.21 (t, *J* = 8.0 Hz, 1 H); <sup>13</sup>C NMR (100 MHz, CDCl<sub>3</sub>) δ 20.0, 40.5, 101.3, 106.9, 112.8, 124.4, 125.9, 126.0, 126.2, 126.7, 127.6, 128.0, 128.3, 128.9, 129.5, 132.2, 132.6, 133.7, 134.1, 135.7, 138.2, 138.3, 143.9, 145.4, 147.6; HRMS (ESI) calcd. for C<sub>25</sub>H<sub>22</sub>NO<sub>2</sub> (M + NH<sub>4</sub>)<sup>+</sup> 368.1645, found 368.1657.

**16-Methyl-10*H*-benzo[5',6']naphtho[1'',2'':3',4']cyclohepta[1',2':3,4]benzo[1,2-*d*][1,3]dioxole (4k):**

Colorless solid; *R<sub>f</sub>* (hexane, eluted twice) 0.3; mp 188-190 °C; yield 26 mg, 15%; <sup>1</sup>H NMR (400 MHz, CDCl<sub>3</sub>) δ 2.85 (s, 3 H), 3.43 (d, *J<sub>ab</sub>* = 12.8 Hz, 1 H), 4.02 (dd, *J<sub>ab</sub>* = 12.8 and 1.6 Hz, 1 H), 6.07 (d, *J* = 3.6 Hz, 2H), 6.75 (dd, *J* = 8.0 and 2.8 Hz, 1 H), 7.02 (dd, *J* = 8.0 and 2.0 Hz, 1 H), 7.35 (t, *J* = 7.2 Hz, 1 H), 7.42 (d, *J* = 6.8 Hz, 1 H), 7.55 (t, *J* = 6.8 Hz, 1 H), 7.61 (t, *J* = 8.0 Hz, 1 H), 7.65 (s, 1 H), 7.74 (d, *J* = 7.2 Hz, 1 H), 8.13 (d, *J* = 8.4 Hz, 1 H), 8.28 (d, *J* = 8.4 Hz, 1 H); <sup>13</sup>C NMR (100 MHz, CDCl<sub>3</sub>) δ 19.9, 32.5, 101.3, 105.5, 124.3, 125.9, 126.0, 126.1, 126.2, 126.8, 126.9, 127.8, 128.5, 129.1, 129.3, 129.8, 132.5, 132.7, 133.7, 133.9, 135.7, 139.0, 142.6, 143.9, 146.7; HRMS (ESI) calcd. for C<sub>25</sub>H<sub>22</sub>NO<sub>2</sub> (M + NH<sub>4</sub>)<sup>+</sup> 368.1645, found 368.1659.

**7-Chloro-15-methyl-9*H*-dibenzo[3,4:6,7]cyclohepta[1,2-*a*]naphthalene (3l):**

Colorless solid;  $R_f$  (hexane) 0.60; mp 130-132 °C; yield 24 mg, 15%;  $^1\text{H}$  NMR (400 MHz,  $\text{CDCl}_3$ )  $\delta$  3.67 (d,  $J_{ab} = 2.8$  Hz, 2 H), 7.23 (dd,  $J = 8.4$  and 2.0 Hz, 1 H), 7.33-7.37 (m, 3 H), 7.43-7.58 (m, 4 H), 7.70-7.73 (m, 1 H), 7.79 (d,  $J = 8.4$  Hz, 1 H), 7.96-7.99 (m, 2 H), 8.12 (d,  $J = 8.4$  Hz, 1 H);  $^{13}\text{C}$  NMR (100 MHz,  $\text{CDCl}_3$ )  $\delta$  40.5, 125.5, 126.2, 126.5, 126.6, 126.7, 127.0, 127.4, 128.1, 128.3, 128.4, 129.7, 131.9, 132.7, 133.4, 133.8, 133.9, 134.6, 136.3, 138.1, 143.0, 145.8; HRMS (ESI) calcd. for  $\text{C}_{23}\text{H}_{19}\text{ClN}$  ( $\text{M} + \text{NH}_4$ ) $^+$  344.1201, found 344.1209.

**11-Methoxy-9H-dibenzo[3,4:6,7]cyclohepta[1,2-a]naphthalene (3m):**

Colorless gum;  $R_f$  (hexane) 0.50; yield 140 mg, 85%;  $^1\text{H}$  NMR (400 MHz,  $\text{CDCl}_3$ )  $\delta$  3.68 (d,  $J_{ab} = 2.8$  Hz, 2 H), 3.86 (s, 3 H), 6.87 (dd,  $J = 8.4$  and 2.6 Hz, 1 H), 6.91 (d,  $J = 2.6$  Hz, 1 H), 7.27 (t,  $J = 8.4$  Hz, 1 H), 7.34 (t,  $J = 7.2$  Hz, 1 H), 7.43 (d,  $J = 7.2$  Hz, 1 H), 7.48-7.55 (m, 4 H), 7.63 (d,  $J = 8.4$  Hz, 1 H), 7.77 (d,  $J = 8.4$  Hz, 1 H), 7.94 (d,  $J = 8.4$  Hz, 2 H), 8.16 (d,  $J = 8.4$  Hz, 1H);  $^{13}\text{C}$  NMR (100 MHz,  $\text{CDCl}_3$ )  $\delta$  41.1, 55.6, 112.0, 112.1, 125.3, 125.8, 126.3, 126.7, 127.7, 127.9, 128.1, 128.2, 128.3, 130.7, 131.1, 132.2, 133.2, 134.5, 135.2, 136.0, 144.0, 145.0, 159.7; HRMS (ESI) calcd. for  $\text{C}_{24}\text{H}_{19}\text{O}$  ( $\text{M} + \text{H}$ ) $^+$  323.1430, found 323.1432.

**11-Methoxy-15-methyl-9H-dibenzo[3,4:6,7]cyclohepta[1,2-a]naphthalene (3n):**

Colorless gum;  $R_f$  (hexane) 0.50; yield 130 mg, 78%;  $^1\text{H}$  NMR (400 MHz,  $\text{CDCl}_3$ )  $\delta$  2.80 (s, 3 H), 3.63 (d,  $J_{ab} = 2.8$  Hz, 2 H), 3.82 (s, 3 H), 6.83 (dd,  $J = 8.4$  and 2.6 Hz, 1 H), 6.87 (d,  $J = 2.6$  Hz, 1 H), 7.21 (t,  $J = 8.4$  Hz, 1 H), 7.28 (t,  $J = 7.4$  Hz, 1 H), 7.38 (d,  $J = 7.4$  Hz, 1 H), 7.44-7.49 (m, 2 H), 7.54 (t,  $J = 7.4$  Hz, 1 H), 7.60 (s, 1 H), 7.61 (d,  $J = 8.4$  Hz, 1 H), 8.07 (d,  $J = 8.4$  Hz, 2 H), 8.15 (d,  $J = 8.4$  Hz, 1H);  $^{13}\text{C}$  NMR (100 MHz,  $\text{CDCl}_3$ )  $\delta$  20.0, 41.2, 55.5, 111.9, 112.1, 124.3, 125.3, 125.7, 125.9, 126.6, 127.9, 128.3, 128.9, 130.6, 131.1, 132.3, 132.4, 132.9, 133.7, 133.9, 134.7, 135.6, 143.9, 145.0, 159.7; HRMS (ESI) calcd. for  $\text{C}_{25}\text{H}_{21}\text{O}$  ( $\text{M} + \text{H}$ ) $^+$  337.1587, found 337.1589.

**15-Phenyl-9H-dibenzo[3,4:6,7]cyclohepta[1,2-a]naphthalene (3o):**

Colorless gum;  $R_f$  (hexane) 0.50; yield 74 mg, 40%;  $^1\text{H}$  NMR (400 MHz,  $\text{CDCl}_3$ )  $\delta$  3.76 (s, 2 H), 7.25-7.33 (m, 4 H), 7.35-7.38 (m, 2 H), 7.44-7.51 (m, 4 H), 7.54-7.62 (m, 4 H), 7.72-7.74 (m, 1 H), 7.77 (s, 1 H), 8.01-8.04 (m, 1 H), 8.23-8.26 (m, 1 H);  $^{13}\text{C}$  NMR (100 MHz,  $\text{CDCl}_3$ )  $\delta$  40.9, 125.3, 126.1, 126.2, 126.4, 126.5, 126.7, 127.6, 128.1, 128.2, 128.3, 128.6, 129.2, 129.7, 130.4, 131.7, 132.5, 132.8, 134.3, 135.4, 135.7, 138.1, 140.0, 141.0, 143.8, 144.5; HRMS (ESI) calcd. for  $\text{C}_{29}\text{H}_{21}$  ( $\text{M} + \text{H}$ ) $^+$  369.1638, found 369.1645.

**7-Methyl-15-phenyl-9H-dibenzo[3,4:6,7]cyclohepta[1,2-*a*]naphthalene (3p):**

Colorless gum;  $R_f$  (hexane) 0.50; yield 92 mg, 48%;  $^1\text{H}$  NMR (400 MHz,  $\text{CDCl}_3$ )  $\delta$  2.43 (s, 3 H), 3.73 (d,  $J_{ab} = 6.7$  Hz, 2 H), 7.10 (d,  $J = 8.0$  Hz, 1 H), 7.28-7.34 (m, 3 H), 7.36-7.39 (m, 1 H), 7.47-7.51 (m, 4 H), 7.57 (t,  $J = 7.2$  Hz, 2 H), 7.64 (d,  $J = 7.2$  Hz, 2 H), 7.78 (s, 1 H), 8.01-8.04 (m, 1 H), 8.27-8.30 (m, 1 H);  $^{13}\text{C}$  NMR (100 MHz,  $\text{CDCl}_3$ )  $\delta$  21.4, 40.9, 126.0, 126.1, 126.2, 126.4, 126.6, 126.7, 127.4, 127.6, 128.1, 128.3, 128.6, 129.2, 129.7, 130.4, 131.4, 131.7, 132.6, 132.7, 135.5, 135.6, 138.1, 138.2, 139.8, 141.0, 143.8, 144.3; HRMS (ESI) calcd. for  $\text{C}_{30}\text{H}_{23}$  ( $\text{M} + \text{H}$ ) $^+$  383.1794, found 383.1792.

**11H-Benzo[5,6]cyclohepta[2,1-*a*:3,4-*a'*]dinaphthalene (3q):**

Colorless solid;  $R_f$  (hexane) 0.80; mp 190-192 °C; yield 60 mg, 35%;  $^1\text{H}$  NMR (400 MHz,  $\text{CDCl}_3$ )  $\delta$  3.73 (d,  $J_{ab} = 13.4$  Hz, 1 H), 4.45 (d,  $J_{ab} = 13.4$  Hz, 1 H), 6.90 (d,  $J = 8.6$  Hz, 1 H), 7.08 (dd,  $J = 7.2$  and 1.0 Hz, 1 H), 7.14-7.17 (m, 2 H), 7.22-7.28 (m, 2 H), 7.35-7.47 (m, 4 H), 7.53 (d,  $J = 8.4$  Hz, 1 H), 7.61 (d,  $J = 7.2$  Hz, 1 H), 7.74 (d,  $J = 8.4$  Hz, 1 H), 7.83 (dd,  $J = 8.4$  and 1.0 Hz, 1 H), 7.91 (d,  $J = 8.4$  Hz, 1 H), 7.97 (d,  $J = 8.4$  Hz, 1 H);  $^{13}\text{C}$  NMR (100 MHz,  $\text{CDCl}_3$ )  $\delta$  42.0, 124.7, 125.7, 125.8, 126.1, 126.6, 127.0, 127.3, 127.4, 127.6, 127.7, 127.8, 127.9, 128.1, 128.6, 129.3, 132.9, 133.1, 133.6, 133.7, 134.8, 135.0, 135.4, 136.1, 136.9, 137.3, 138.3, 139.2, 139.5, 140.5, 141.4, 142.1; HRMS (ESI) calcd. for  $\text{C}_{27}\text{H}_{19}$  ( $\text{M} + \text{H}$ ) $^+$  343.1481, found 343.1463.

**5-(Naphthalen-1-yl)-11H-benzo[*b*]fluorene (4q):**

Colorless solid;  $R_f$  (hexane) 0.80; mp 90-92 °C; yield 76 mg, 45%;  $^1\text{H}$  NMR (400 MHz,  $\text{CDCl}_3$ )  $\delta$  3.74 (d,  $J_{ab} = 12.6$  Hz, 1 H), 3.79 (d,  $J_{ab} = 12.6$  Hz, 1 H), 7.10-7.12 (m, 1 H), 7.17 (d,  $J = 8.4$  Hz, 1 H), 7.22 (dd,  $J = 7.2$  and 1.5 Hz, 1 H), 7.25 (d,  $J = 7.2$  Hz, 1 H), 7.27-7.30 (m, 1 H), 7.32 (d,  $J = 7.2$  Hz, 1 H), 7.40 (d,  $J = 8.4$  Hz, 1 H), 7.44-7.51 (m, 2 H), 7.56 (d,  $J = 8.4$  Hz, 1 H), 7.72 (dd,  $J = 7.2$  and 1.5 Hz, 1 H), 7.79-7.88 (m, 3 H), 7.96 (d,  $J = 8.4$  Hz, 1 H), 8.00 (d,  $J = 8.4$  Hz, 1 H);  $^{13}\text{C}$  NMR (100 MHz,  $\text{CDCl}_3$ )  $\delta$  41.2, 124.8, 125.6, 125.8, 125.9, 126.0, 126.4, 126.8, 127.9, 128.0, 128.1, 128.2, 128.3, 128.4, 128.8, 129.0, 129.1, 130.0, 130.5, 132.4, 132.5, 133.2, 134.0, 137.8, 138.5, 142.8, 144.1; HRMS (ESI) calcd. for  $\text{C}_{27}\text{H}_{19}$  ( $\text{M} + \text{H}$ ) $^+$  343.1481, found 343.1481.

**9-Methyl-9H-dibenzo[3,4:6,7]cyclohepta[1,2-*a*]naphthalene (diastereomeric mixture; 3r:4r:: 4:1):**

Colorless gum;  $R_f$  (hexane) 0.80; yield 60 mg, 40%;  $^1\text{H}$  NMR (400 MHz,  $\text{CDCl}_3$ )  $\delta$  1.07 (d,  $J = 7.2$  Hz, 3 H, minor), 1.86 (d,  $J = 7.2$  Hz, 3 H, major), 3.79 (q,  $J = 7.2$  Hz, 1 H, major), 4.18 (q,  $J = 7.2$  Hz, 1 H, minor), 7.22-7.34 (m, 2 H), 7.36-7.44 (m, 3 H), 7.48-7.58 (m, 4 H), 7.72 (d,  $J = 7.8$  Hz, 1 H), 7.82 (d,  $J = 8.4$  Hz, 1 H), 7.95-8.00 (m, 2 H), 8.21 (d,  $J = 8.4$  Hz, 1 H);  $^{13}\text{C}$  NMR (100 MHz,  $\text{CDCl}_3$ )  $\delta$  13.9, 37.4, 121.6, 121.8, 124.8, 126.0, 126.1, 126.4, 127.8, 127.9, 128.0, 128.1, 128.4, 129.5, 131.7, 131.8, 132.4, 133.4, 134.3, 135.8, 136.2, 138.4, 146.7, 147.5; HRMS (ESI) calcd. for  $\text{C}_{24}\text{H}_{19}$  ( $\text{M} + \text{H}$ ) $^+$  307.1481, found 307.1462.

**9-Ethyl-15-methyl-9H-dibenzo[3,4:6,7]cyclohepta[1,2-*a*]naphthalene (diastereomeric mixture; 3s:4s:: 2:1):**

Yellow gum;  $R_f$  (hexane) 0.60; yield 162 mg, 85%;  $^1\text{H}$  NMR (400 MHz,  $\text{CDCl}_3$ )  $\delta$  0.61 (t,  $J = 7.2$  Hz, 3 H, minor), 1.01 (t,  $J = 7.2$  Hz, 3 H, major), 1.34-1.41 (m, 2 H, minor), 2.36-2.41 (m, 2 H, major), 2.77 (s, 3 H, minor), 2.80 (s, 3 H, major), 3.44 (t,  $J = 8.0$  Hz, 1 H, major), 3.81 (t,  $J = 8.0$

Hz, 1 H, minor), 7.12-7.37 (m, 11 H), 7.43-7.56 (m, 5 H), 7.60-7.71 (m, 3 H), 8.04-8.15 (m, 2 H), 8.22 (d,  $J = 8.4$  Hz, 1 H);  $^{13}\text{C}$  NMR (100 MHz,  $\text{CDCl}_3$ )  $\delta$  12.6, 13.6, 19.9, 20.0, 20.9, 22.6, 45.2, 57.9, 121.9, 122.1, 124.3, 124.4, 124.6, 125.3, 125.8, 125.85, 125.9, 126.0, 126.8, 127.8, 127.85, 127.89, 127.9, 128.4, 128.5, 128.7, 128.8, 128.9, 129.0, 129.6, 130.6, 131.9, 132.3, 132.6, 132.65, 132.7, 133.7, 133.8, 133.9, 134.0, 134.3, 134.5, 134.9, 135.4, 135.8, 137.5, 138.7, 145.7, 146.5, 146.7, 147.2 ; Anal. Calcd for  $\text{C}_{26}\text{H}_{22}$ : C, 93.37; H, 6.63. Found: C, 93.32; H, 6.70.

**15-Methyl-9-phenyl-9H-dibenzo[3,4:6,7]cyclohepta[1,2-*a*]naphthalene (3t):**

Yellow gum;  $R_f$  (hexane) 0.60; yield 118 mg, 55%;  $^1\text{H}$  NMR (400 MHz,  $\text{CDCl}_3$ )  $\delta$  2.51 (s, 3 H), 5.35 (s, 1 H), 6.48 (d,  $J = 7.8$  Hz, 1 H), 7.01 (t,  $J = 7.6$  Hz, 1 H), 7.15 (d,  $J = 7.4$  Hz, 1 H), 7.18(d,  $J = 7.6$  Hz, 2 H), 7.21-7.26 (m, 1 H), 7.32 (d,  $J = 7.2$  Hz, 1 H), 7.40 (d,  $J = 8.4$  Hz, 1 H), 7.44-7.51 (m, 2 H), 7.56 (d,  $J = 8.4$  Hz, 1 H), 7.27-7.32 (m, 3 H), 7.41-7.47 (m, 2 H), 7.50-7.58 (m, 2 H), 7.62-7.68 (m, 4 H), 8.09 (d,  $J = 8.4$  Hz, 1 H);  $^{13}\text{C}$  NMR (100 MHz,  $\text{CDCl}_3$ )  $\delta$  15.8, 54.1, 123.8, 123.9, 125.3, 125.5, 126.7, 127.1, 127.2, 127.7, 128.0, 128.3, 129.0, 129.3, 130.2, 130.6, 130.7, 132.1, 132.6, 133.6, 137.3, 139.5, 140.4, 143.0, 143.2, 149.4; HRMS (ESI) calcd. for  $\text{C}_{30}\text{H}_{23}$  (M + H) $^+$  383.1794, found 383.1801.

**17-Methyl-11H-benzo[5,6]cyclohepta[2,1-*a*:3,4-*a'*]dinaphthalene (3u) and 10-Methyl-5-(naphthalen-1-yl)-11H-benzo[*b*]fluorine (4u) (3u:4u::2:3):**

Yellow solid;  $R_f$  (hexane) 0.60; mp 180-182-92 °C; yield 140 mg, 84%;  $^1\text{H}$  NMR (400 MHz,  $\text{CDCl}_3$ )  $\delta$  2.78 (s, 3 H, **3u**), 2.84 (s, 3 H, **4u**), 3.67 (d,  $J = 13.2$  Hz, 1 H, **3u**), 3.71 (d,  $J = 12.6$  Hz, 1 H, **4u**), 3.78 (d,  $J = 12.6$  Hz, 1 H, **4u**), 4.44 (d,  $J = 13.2$  Hz, 1 H, **3u**), 6.90 (d,  $J = 8.6$  Hz, 1 H), 7.02-7.12 (m, 3 H), 7.15-7.36 (m, 11 H), 7.38-7.62 (m, 7 H), 7.67-7.72 (m, 3 H), 7.78 (t,  $J = 8.0$  Hz, 3 H), 8.02 (d,  $J = 8.4$  Hz, 1 H), 8.10 (d,  $J = 8.4$  Hz, 1 H);  $^{13}\text{C}$  NMR (100 MHz,  $\text{CDCl}_3$ )  $\delta$  14.0, 20.0, 37.0, 37.9, 120.4, 121.3, 121.6, 124.0, 124.3, 124.4, 124.7, 125.3, 125.4, 125.5, 125.6, 125.7,

125.74, 125.8, 125.9, 126.2, 126.3, 127.0, 127.2, 127.7, 127.8, 128.0, 128.1, 128.3, 128.4, 128.7, 128.76, 128.8, 129.3, 129.5, 130.3, 131.7, 132.1, 132.3, 132.5, 132.9, 133.1, 133.6, 134.0, 134.2, 134.9, 135.2, 136.1, 136.7, 137.2, 138.7, 141.0, 143.2, 145.1, 145.4, 147.2; HRMS (ESI) calcd. for  $C_{28}H_{21} (M + H)^+$  357.1638, found 357.1636.

# <sup>1</sup>H Spectrum of 1c

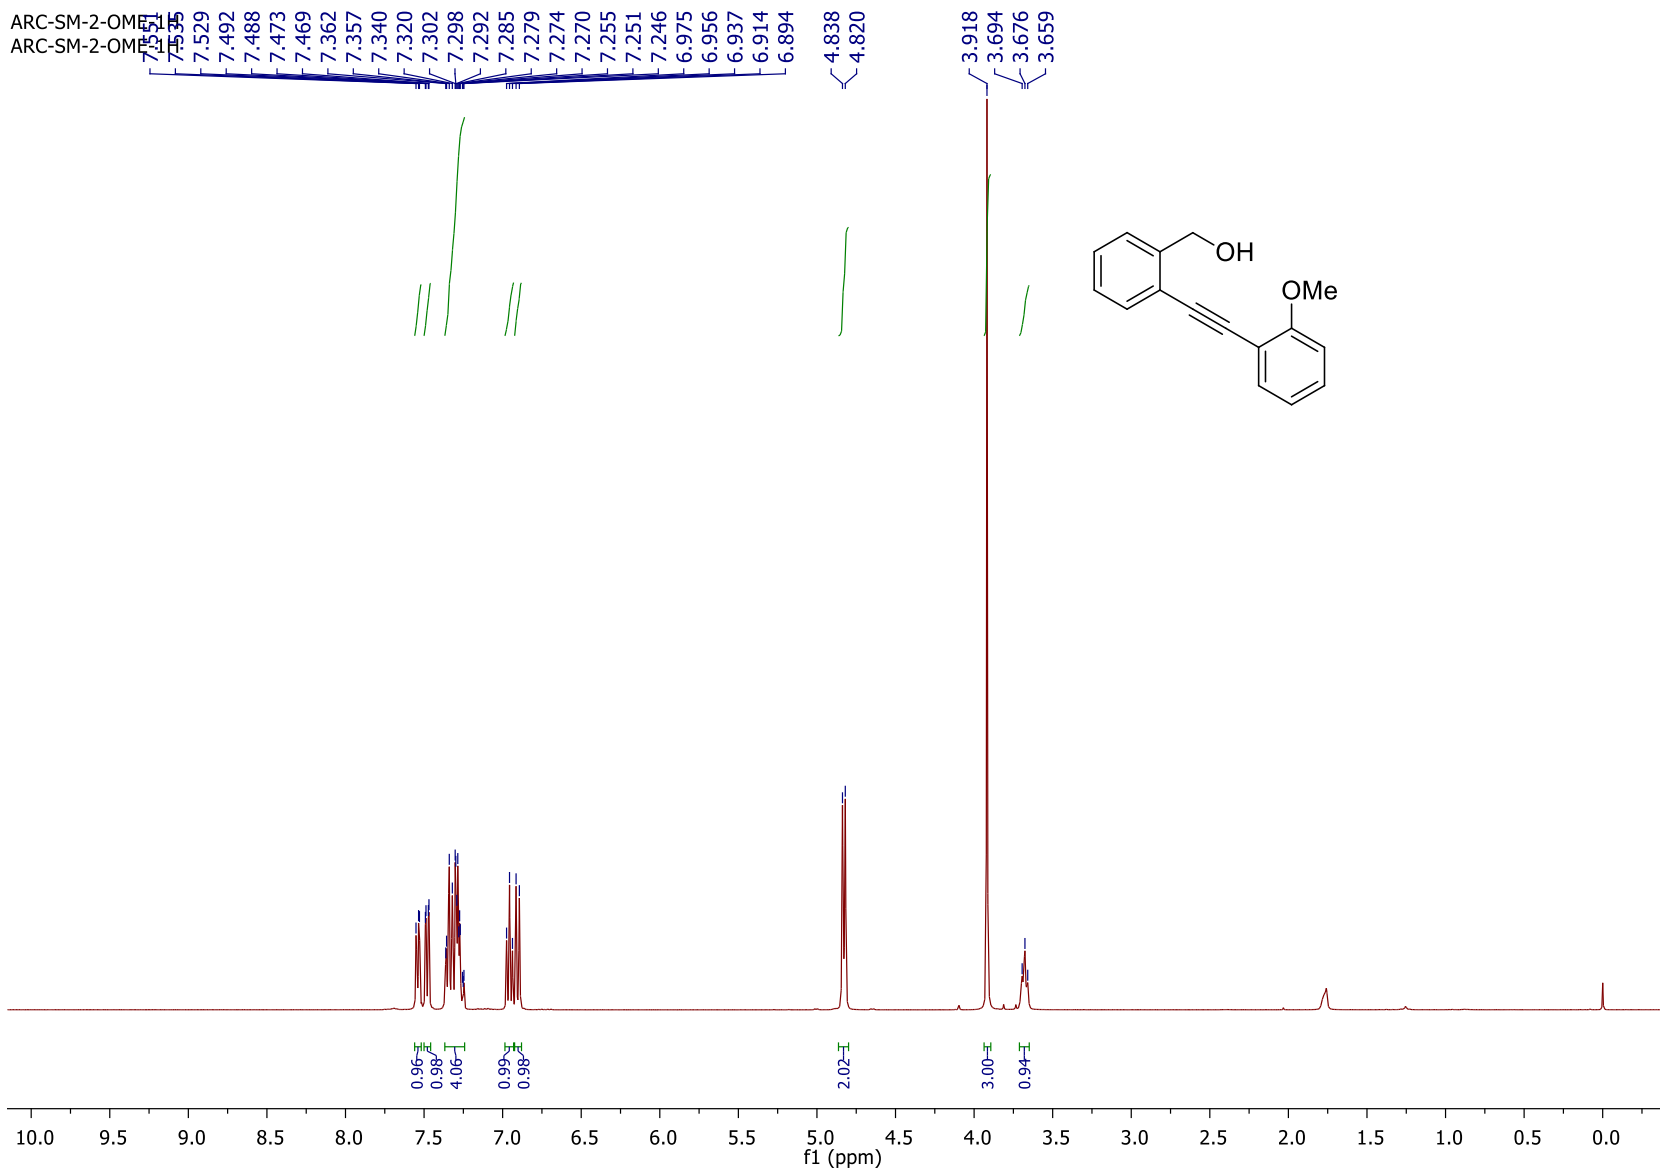

S15

# $^{13}\text{C}$ Spectrum of **1c**

ARC-SM-2-OME--13C  
ARC-SM-2-OME--13C

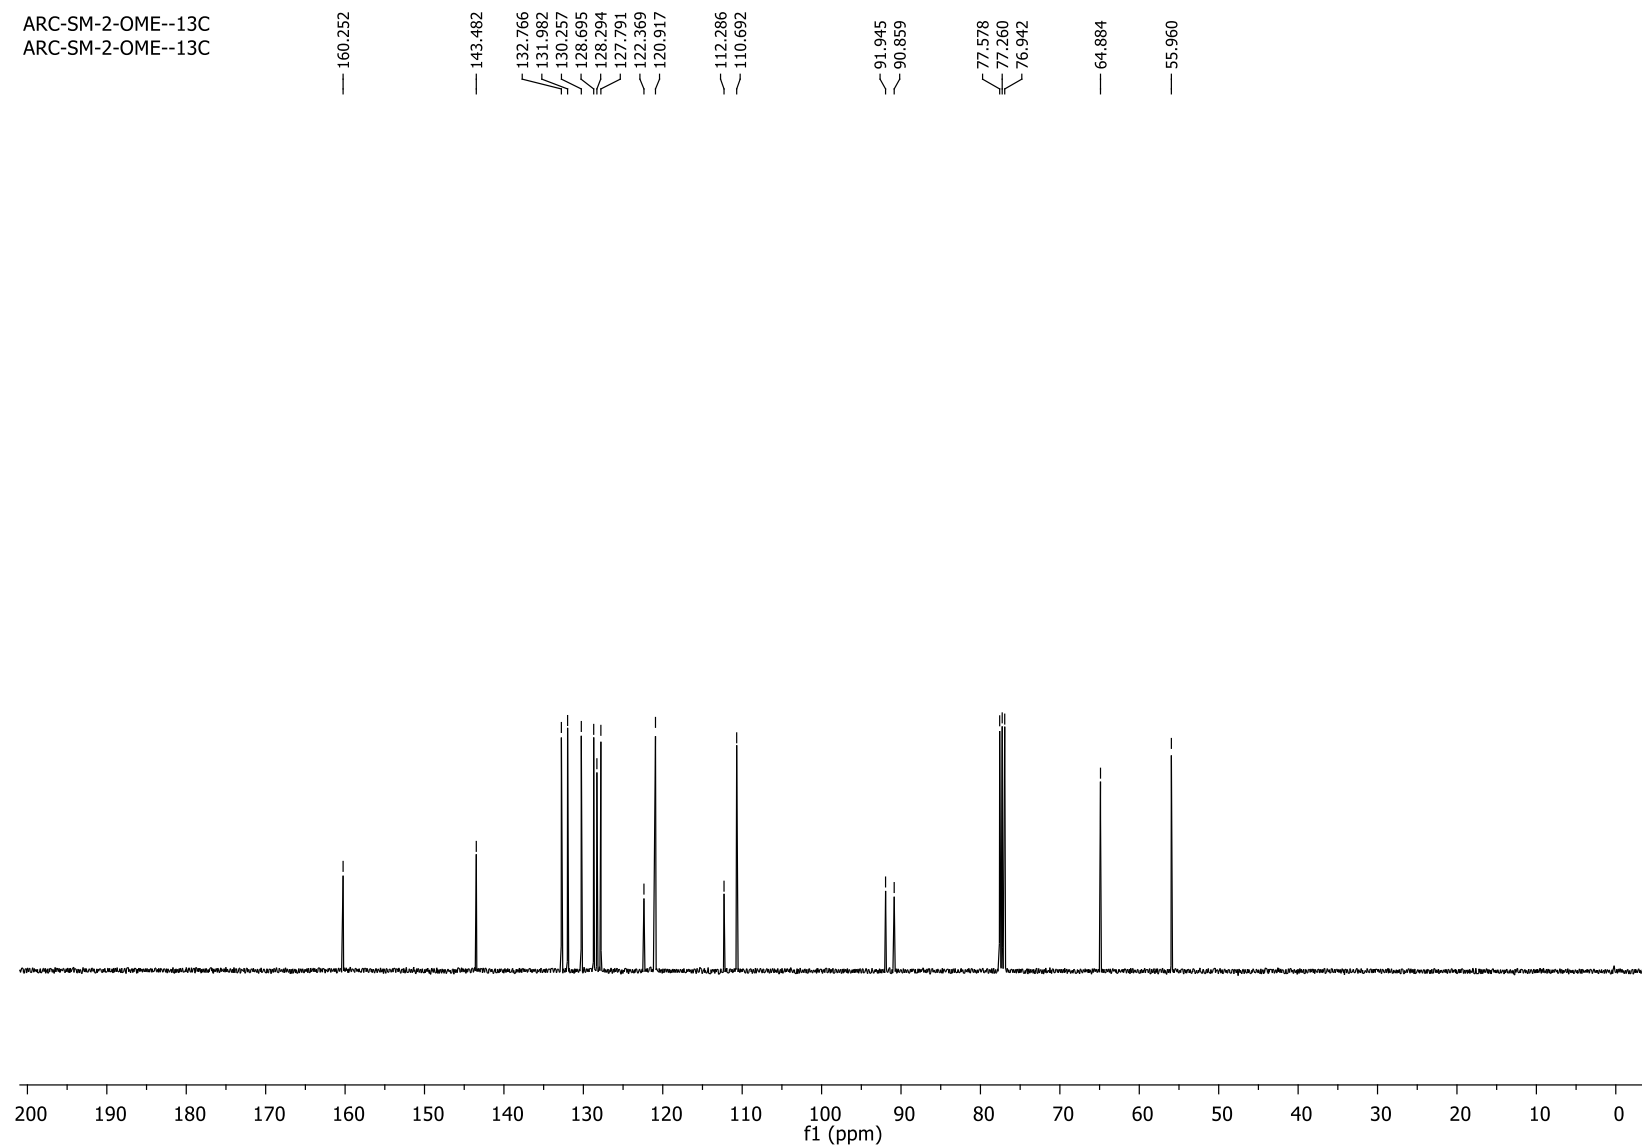



# <sup>1</sup>H Spectrum of **1e**

ARC-SM-COOME-1H  
1H

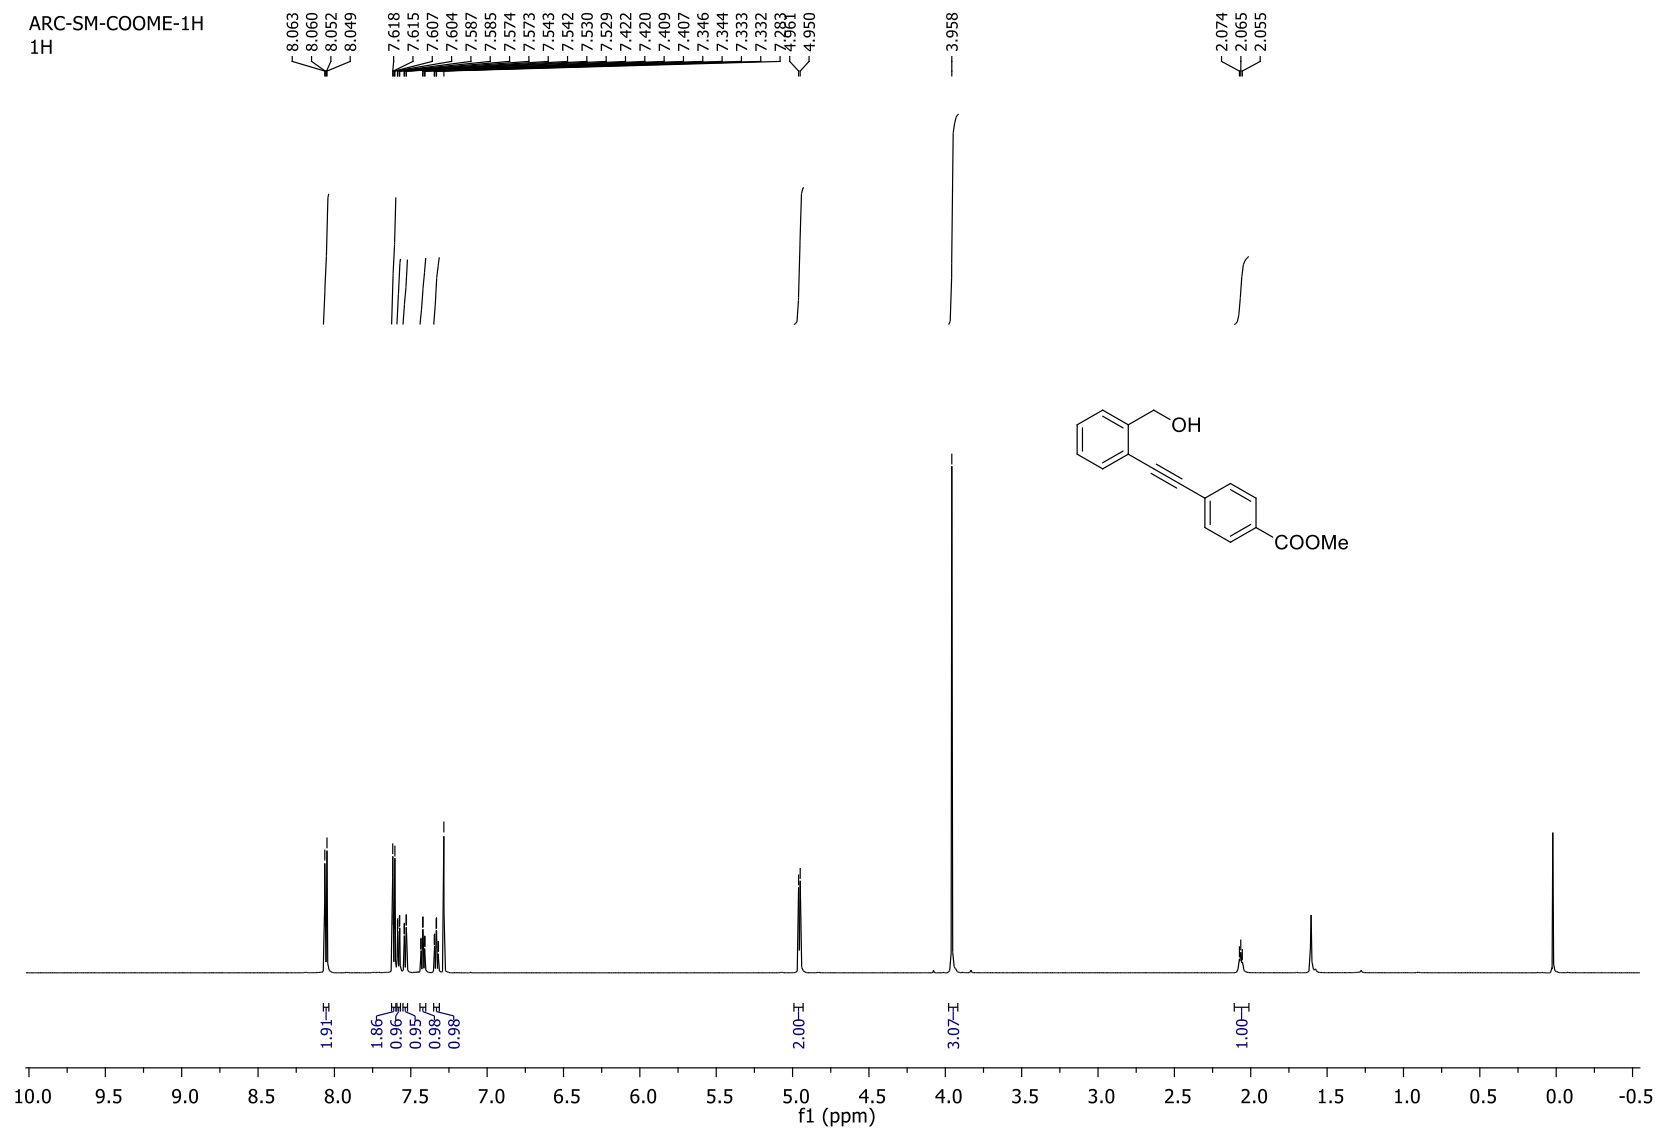

# <sup>13</sup>C Spectrum of 1e

ARC-SM-COOME-13C  
13C

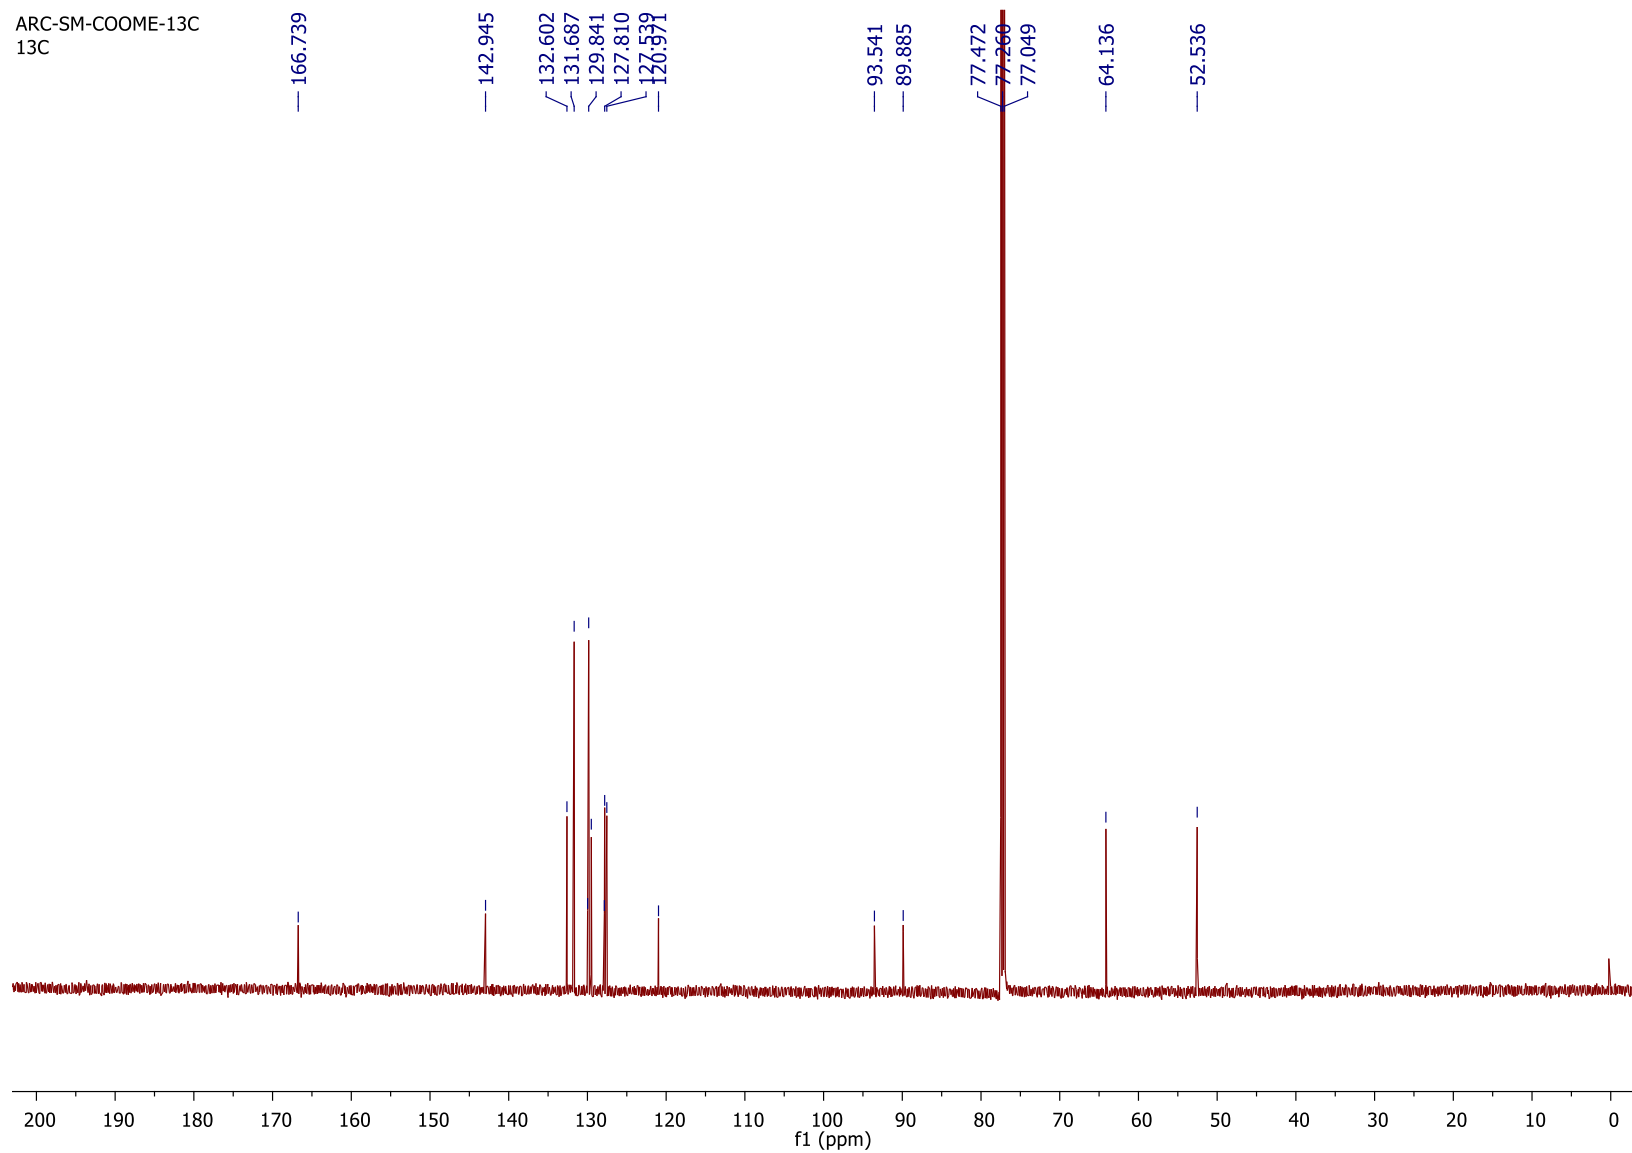

# <sup>1</sup>H Spectrum of **1f**

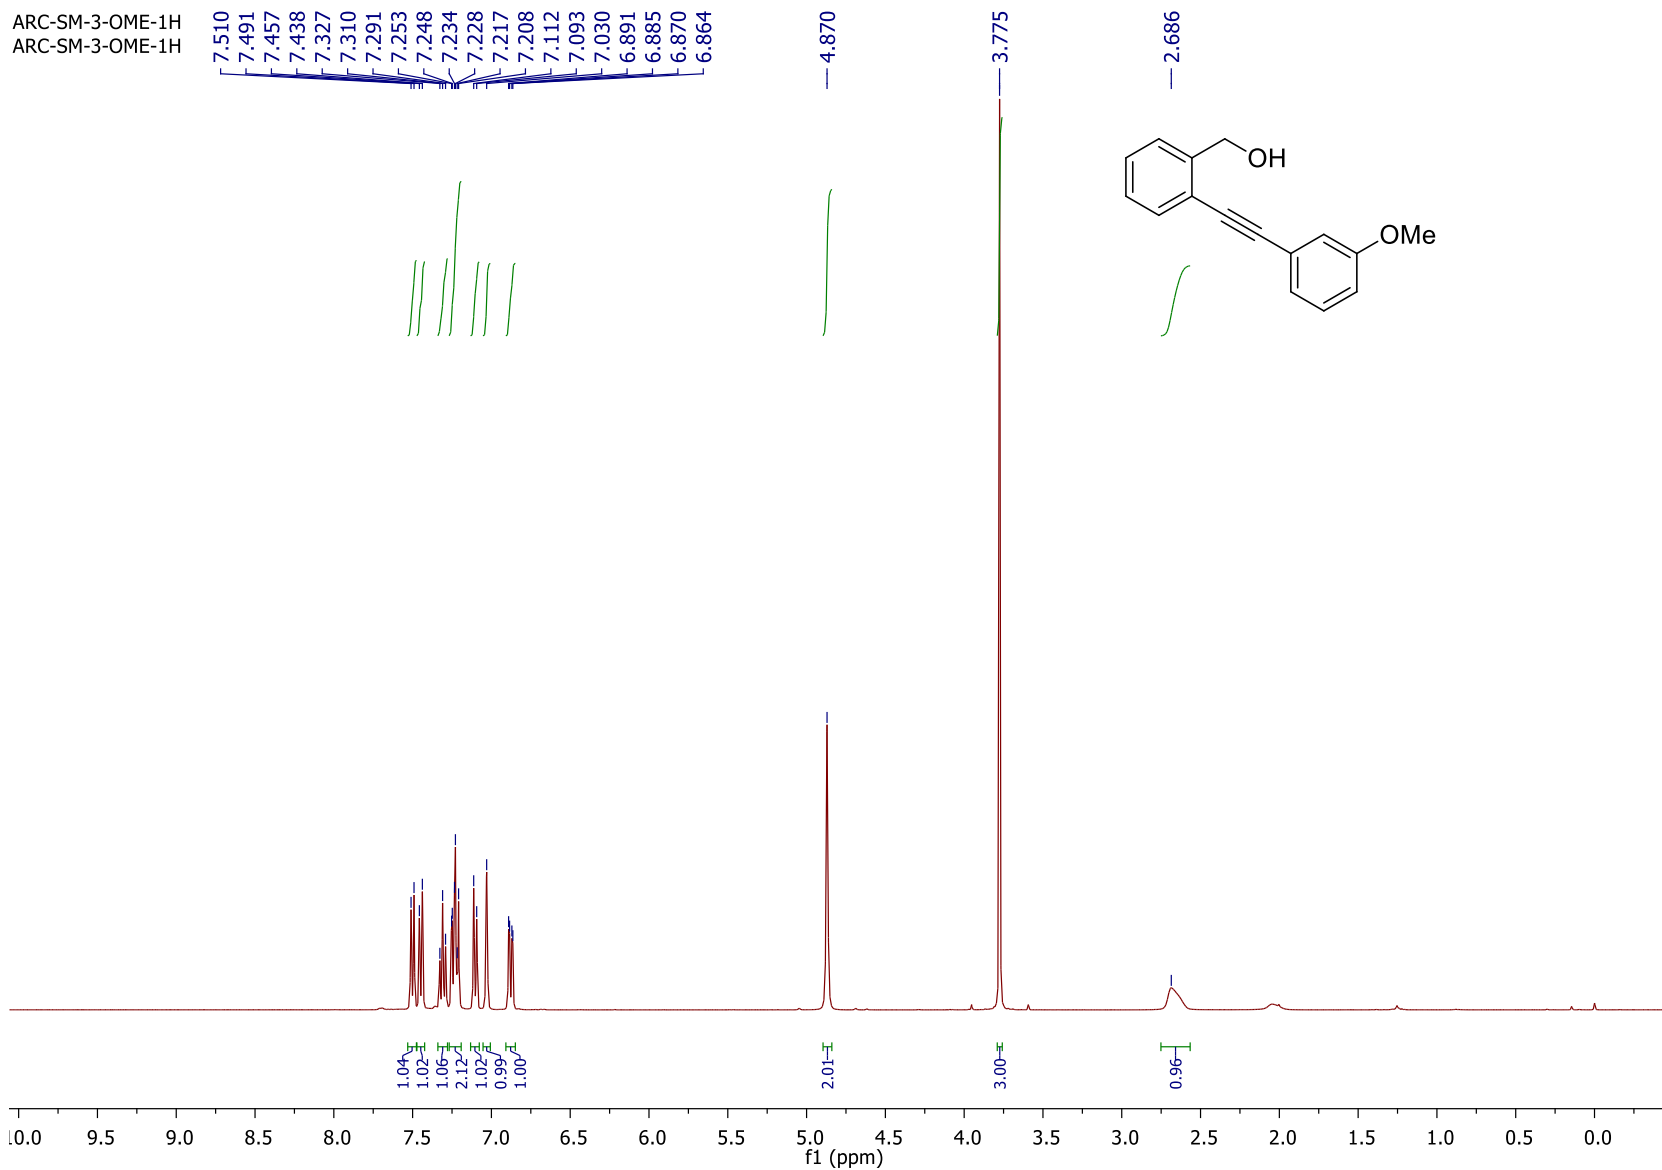

# <sup>13</sup>C Spectrum of **1f**

ARC-SM-3-OME-13C  
ARC-SM-3-OME-13C

— 159.498  
— 142.747  
132.261  
129.650  
128.910  
127.501  
127.215  
124.283  
124.064  
121.195  
116.479  
115.212  
— 94.224  
— 86.735  
77.578  
77.260  
76.941  
— 63.847  
— 55.436

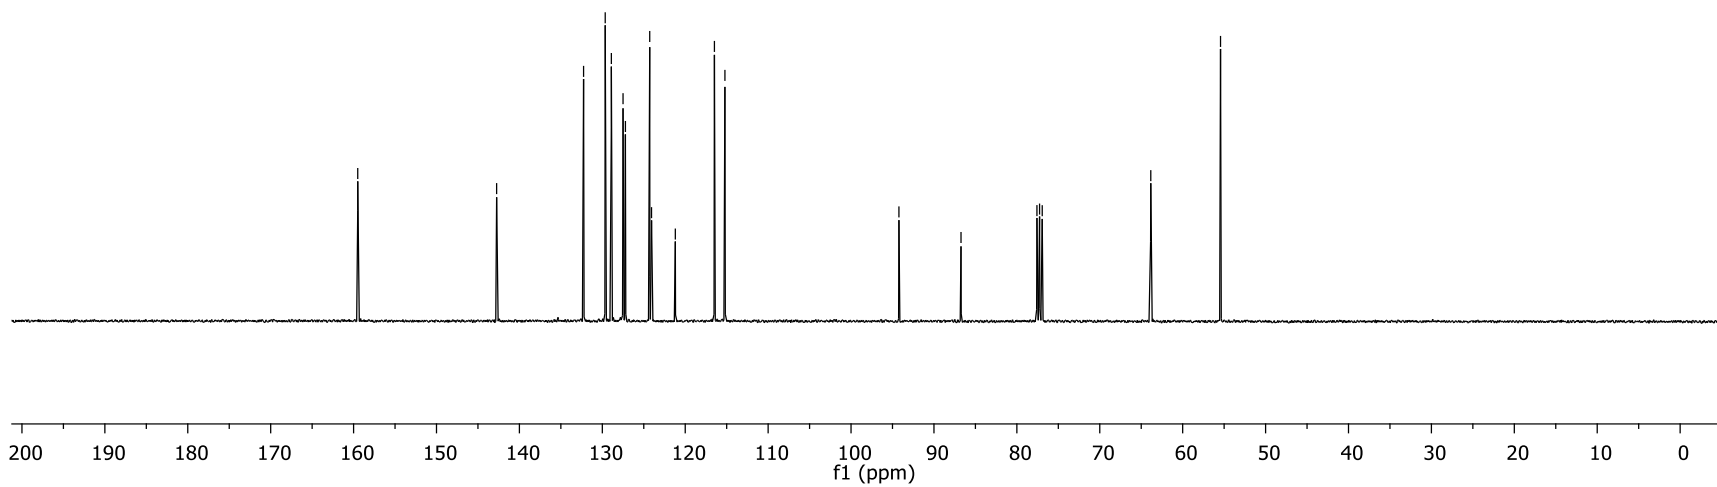

# <sup>1</sup>H Spectrum of **1g**

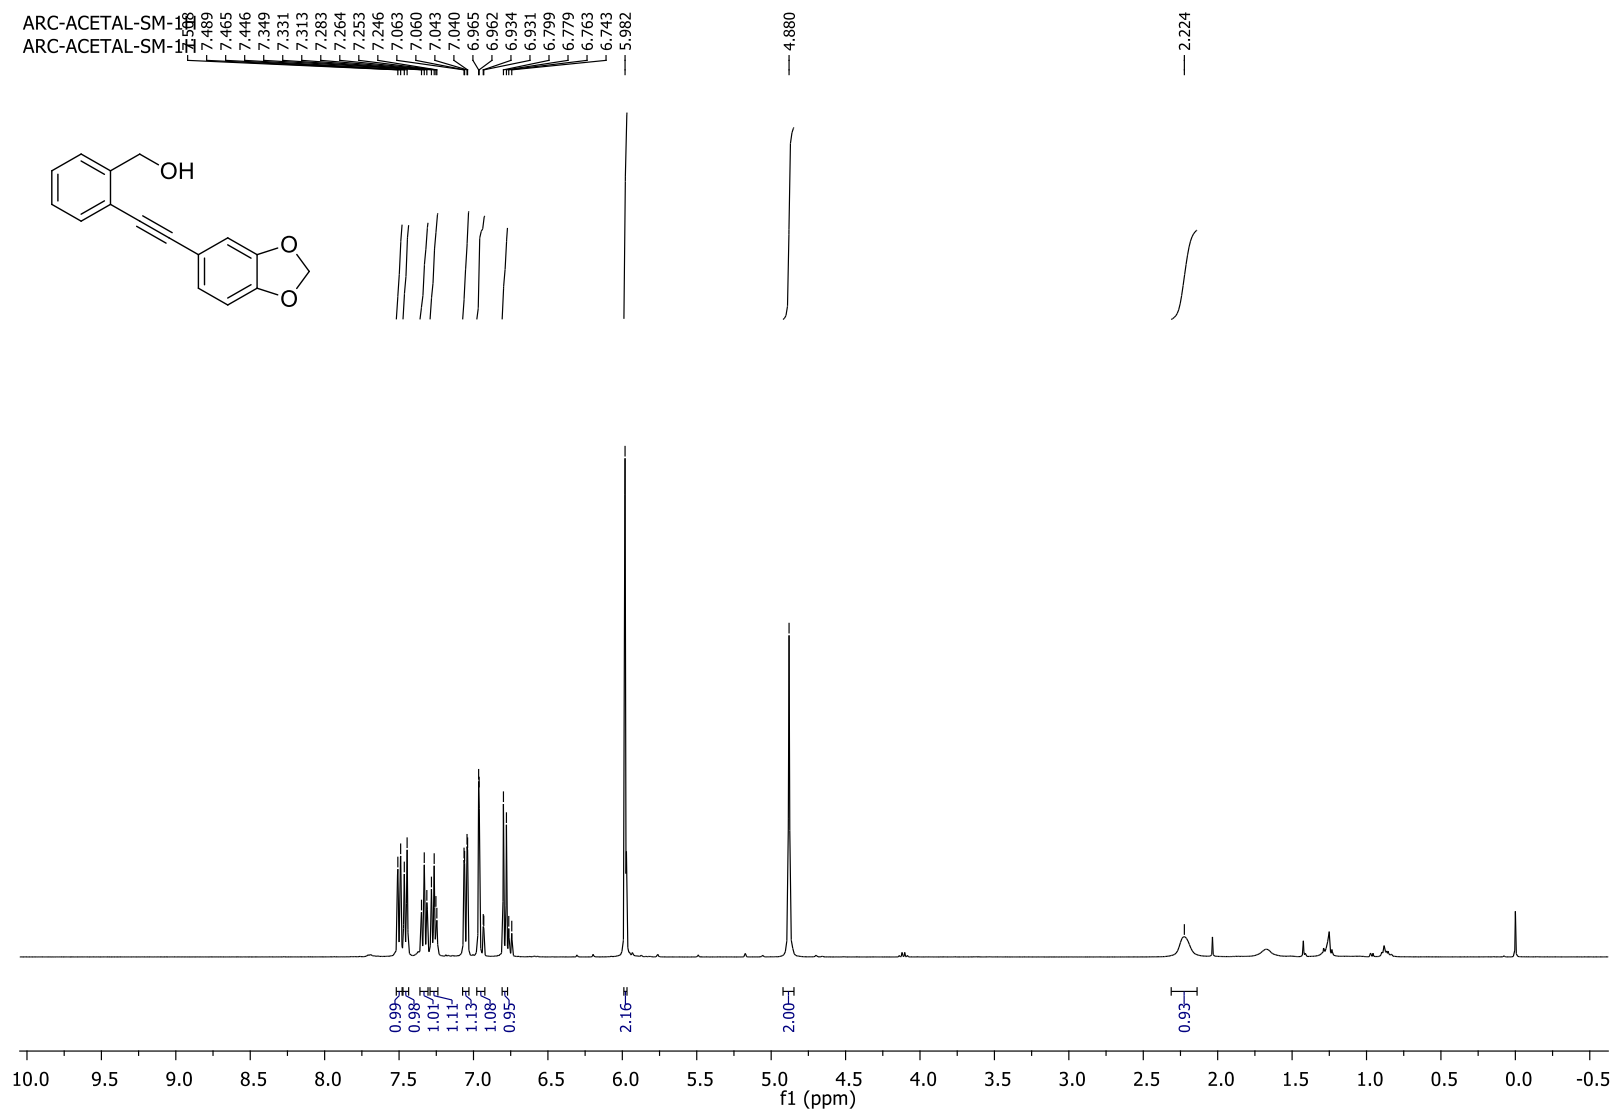

# <sup>13</sup>C Spectrum of **1g**

ARC-ACETAL-SM-13C  
ARC-ACETAL-SM-13C

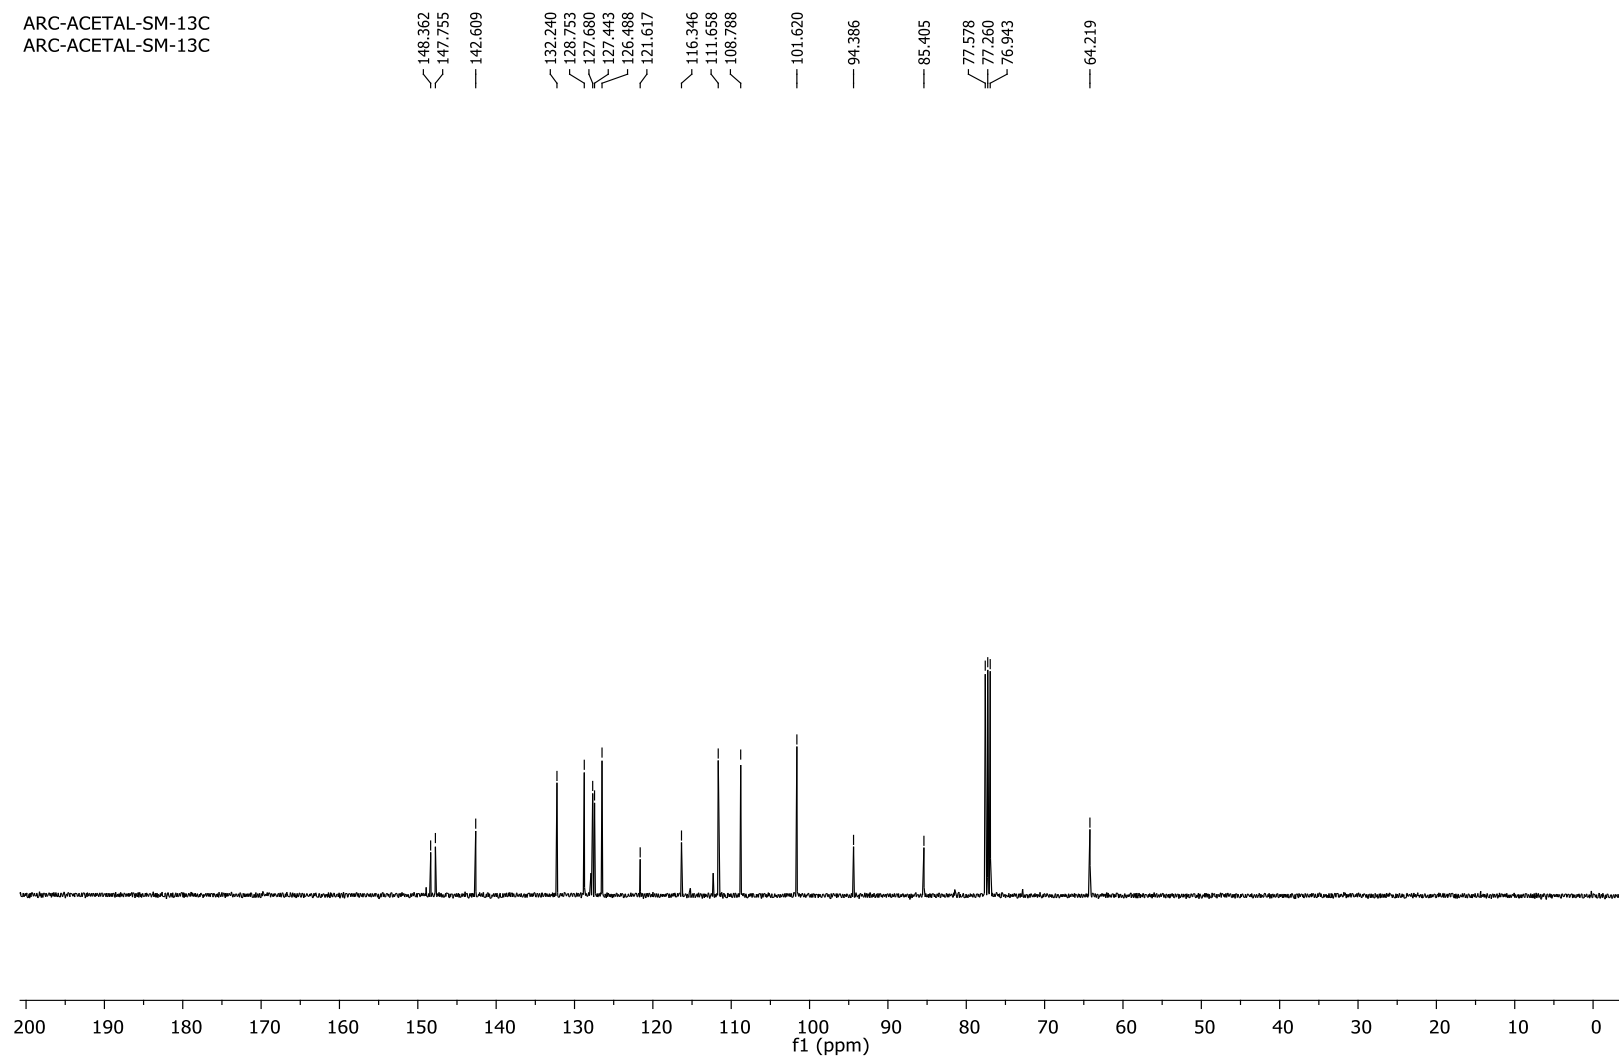

# <sup>1</sup>H Spectrum of **1n**

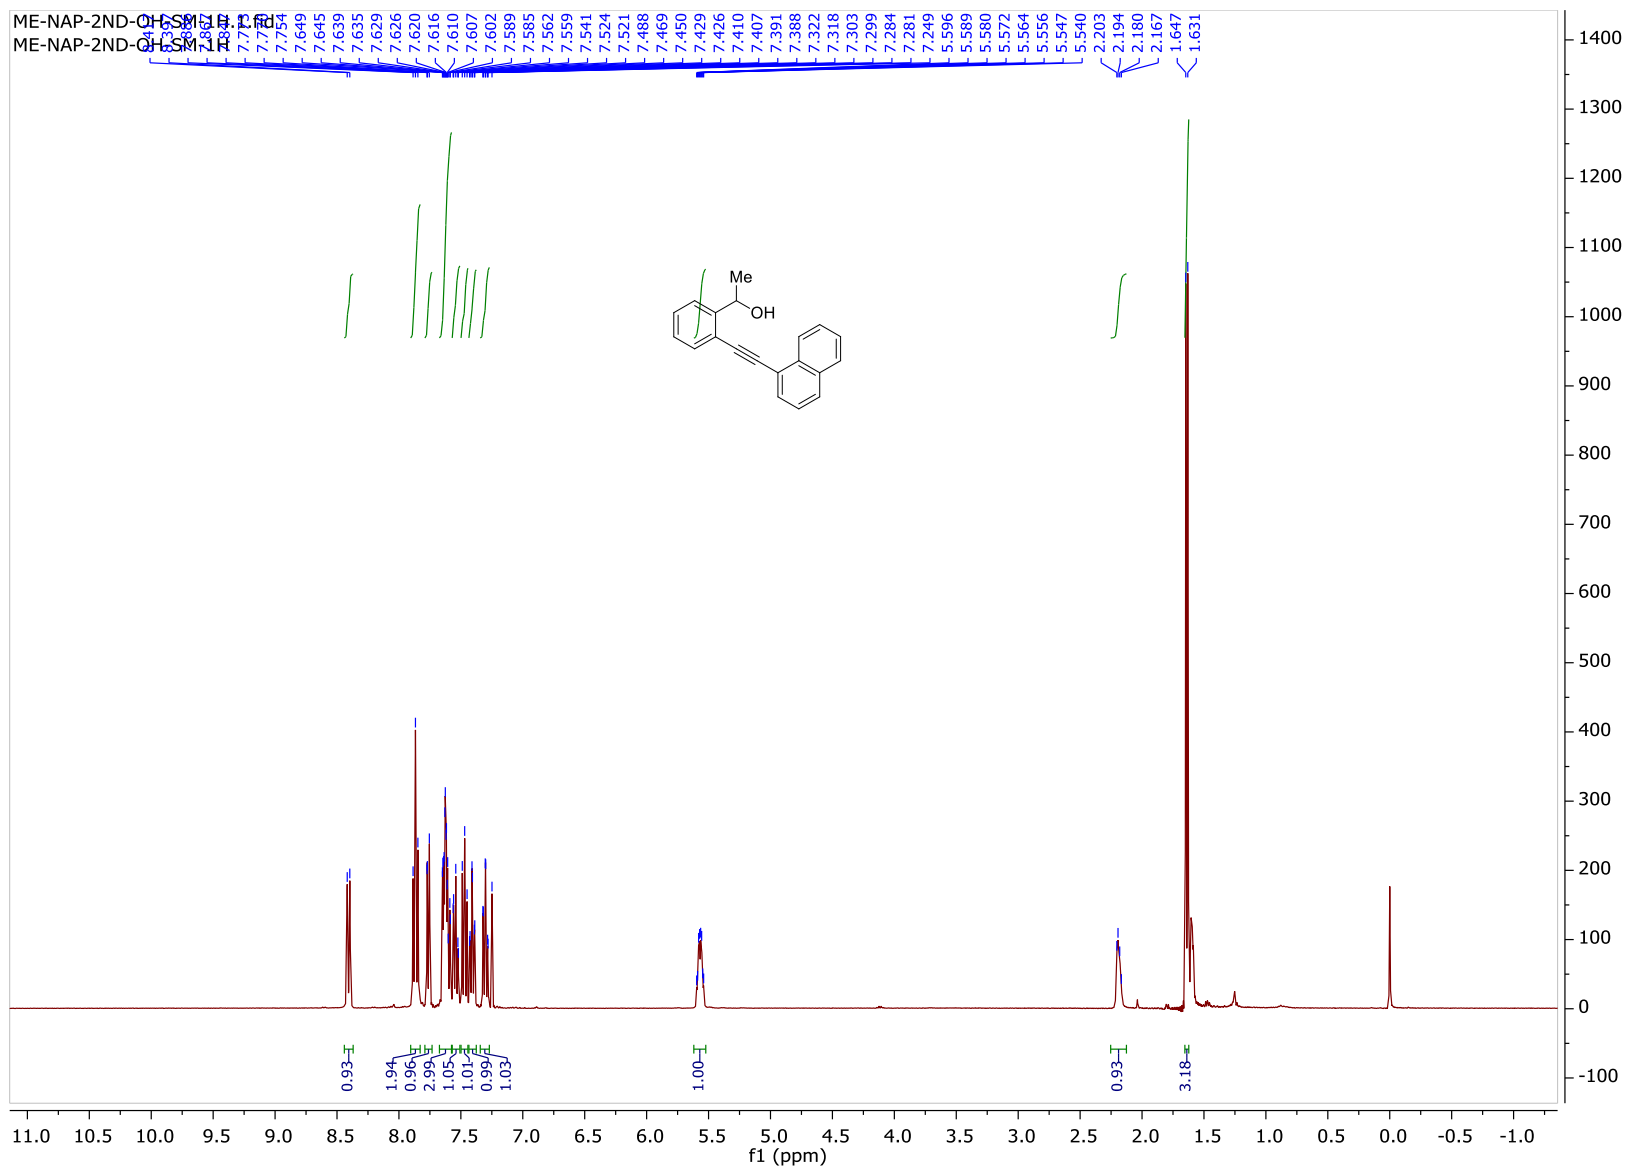

# <sup>13</sup>C Spectrum of **1n**

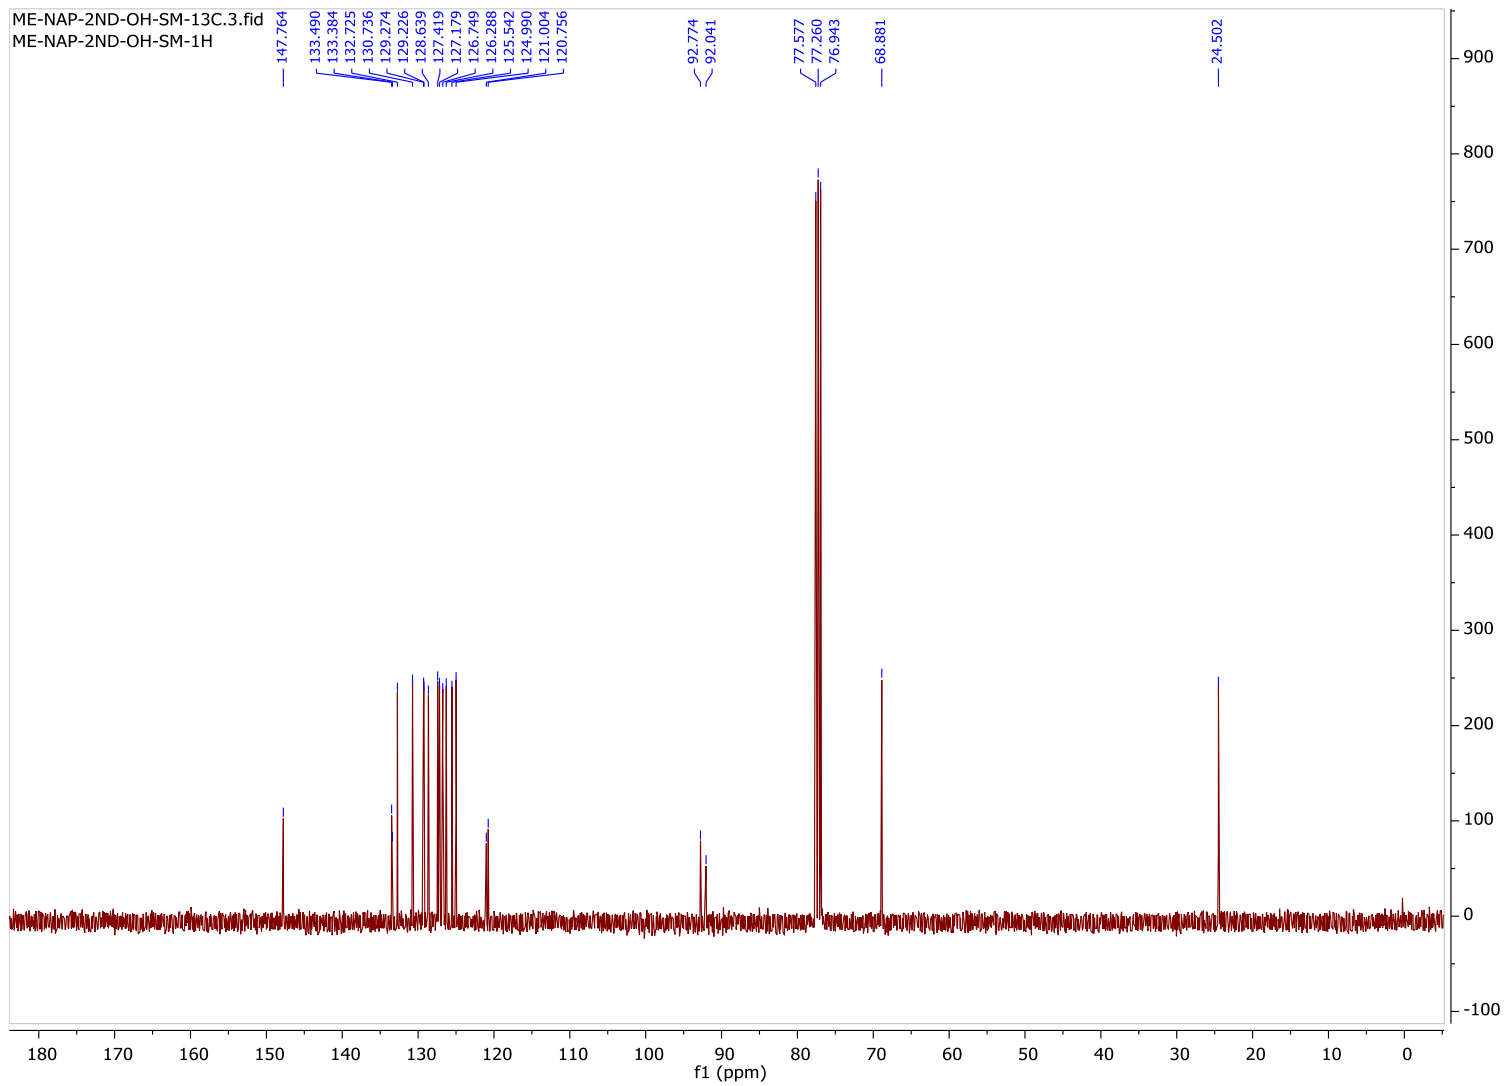



# <sup>1</sup>H Spectrum of 3a

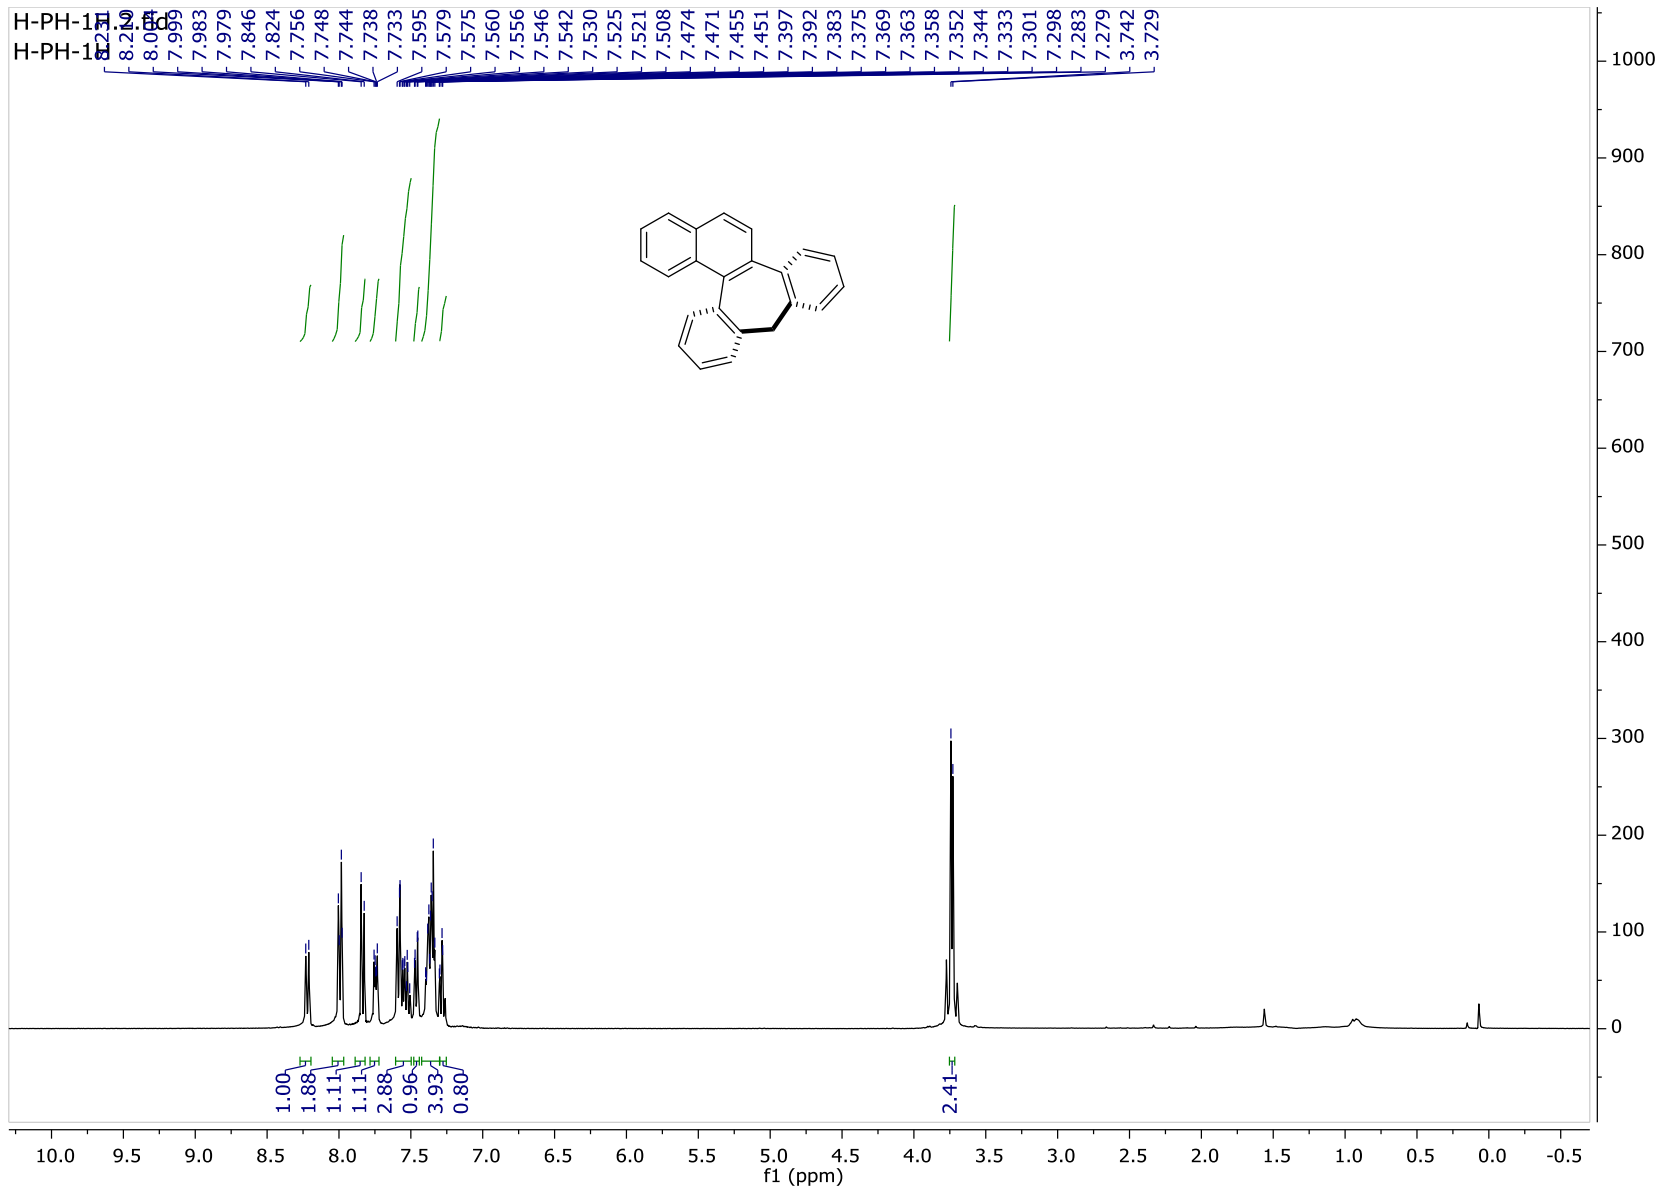

S25

# <sup>13</sup>C Spectrum of **3a**

ARC-H-PH-1-13C  
13C

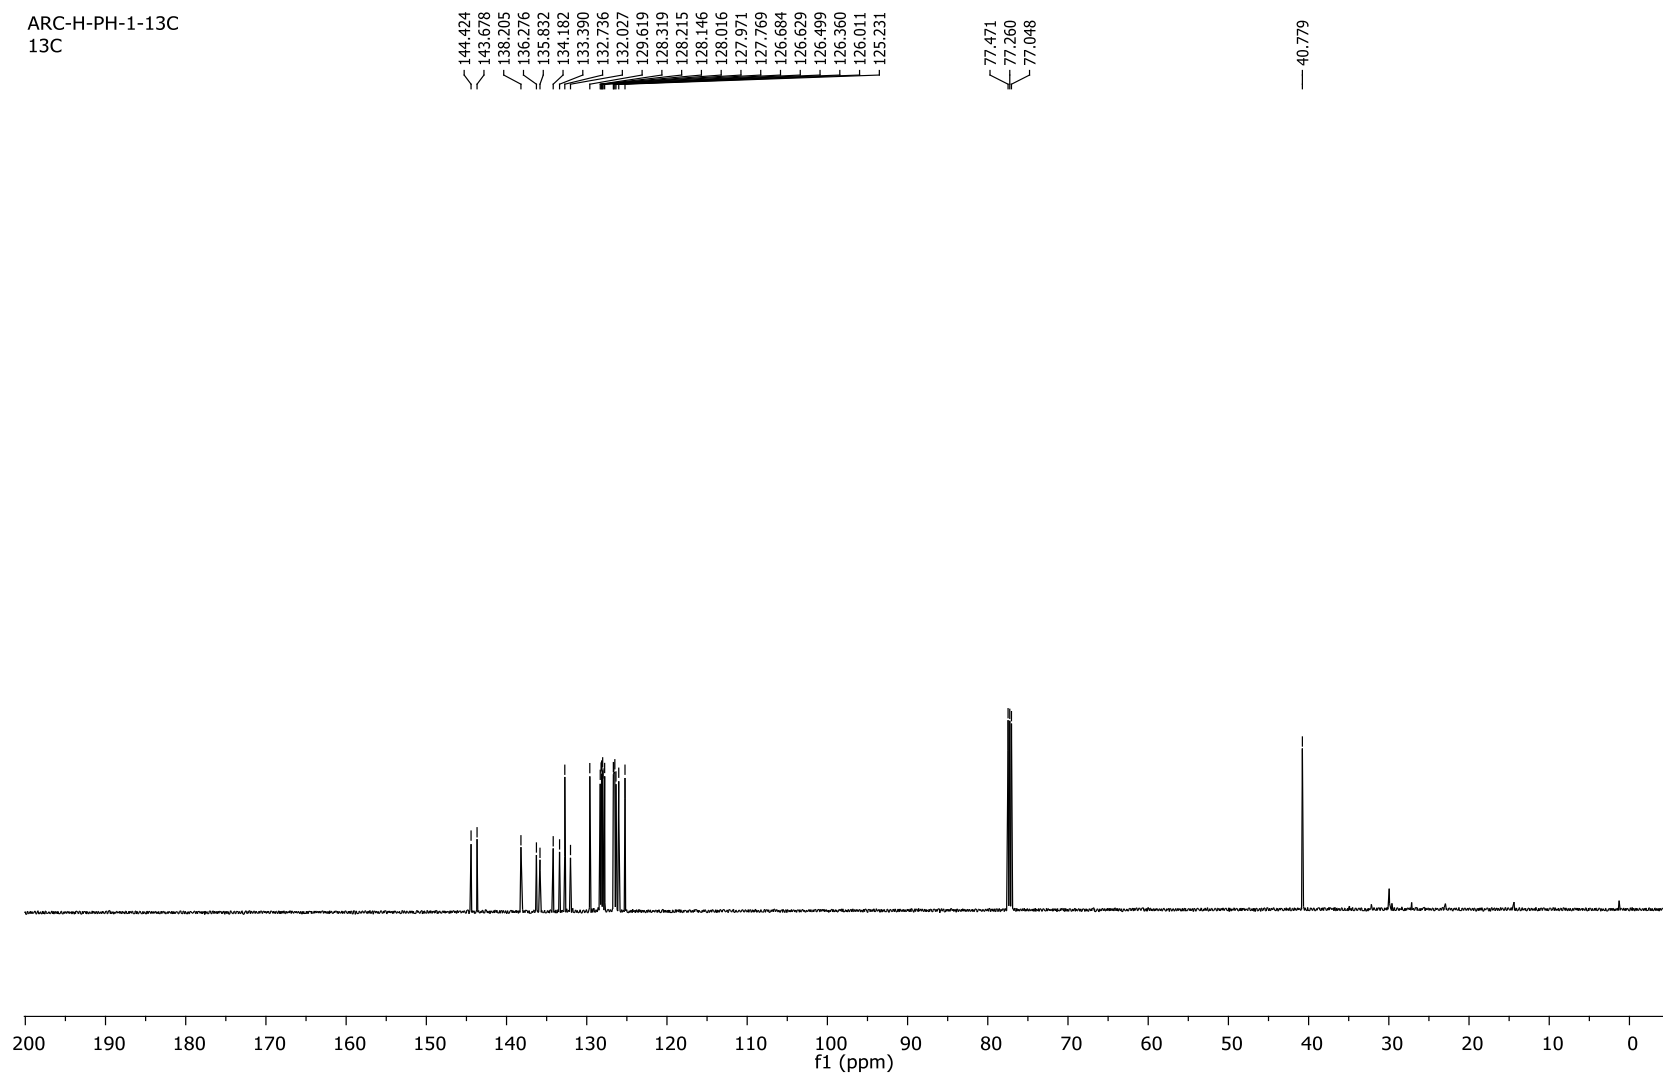

# <sup>1</sup>H Spectrum of **3b**

ARC-ME-H-3RD-1H  
ARC-ME-H-3RD-1H

8.189  
8.168  
8.097  
8.076  
7.700  
7.694  
7.679  
7.633  
7.572  
7.555  
7.535  
7.495  
7.486  
7.476  
7.467  
7.448  
7.391  
7.373  
7.319  
7.304  
7.297  
7.284  
7.277  
7.270  
7.260  
7.217  
7.200  
7.181

3.665  
3.658

2.800

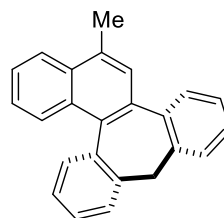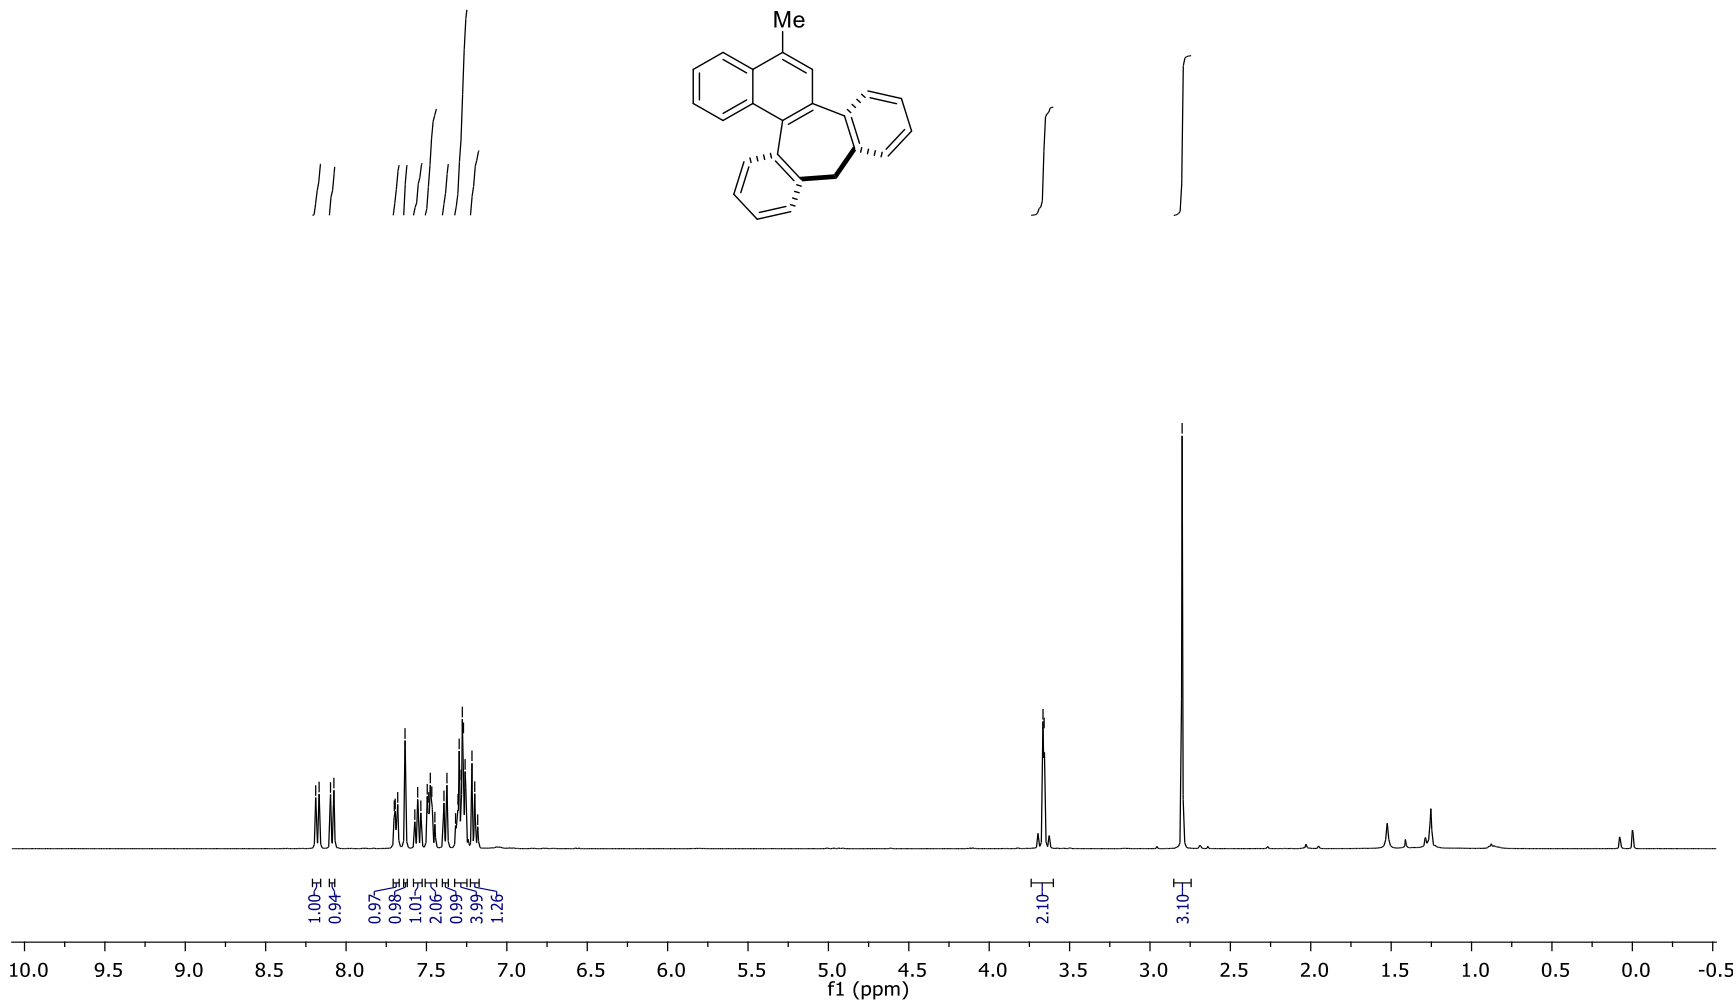

# <sup>13</sup>C Spectrum of **3b**

ARC-ME-H-P-13C  
ARC-ME-H-P-13C

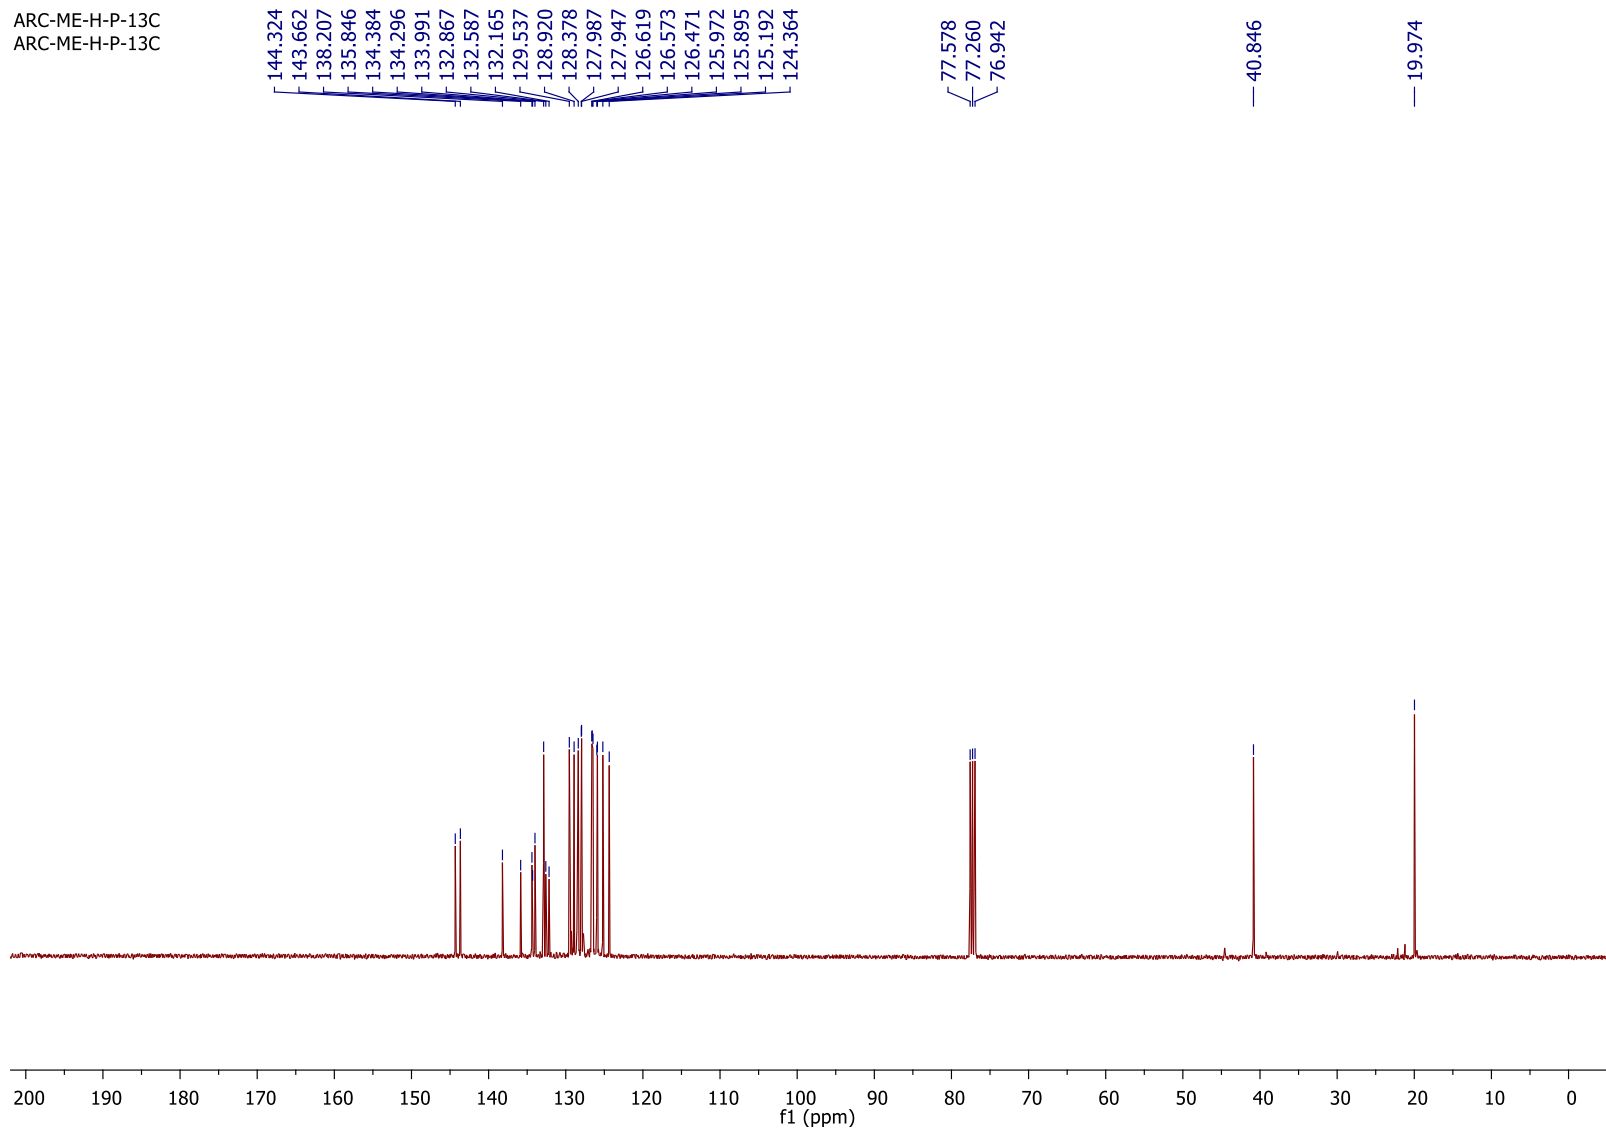

# <sup>1</sup>H Spectrum of **3c**

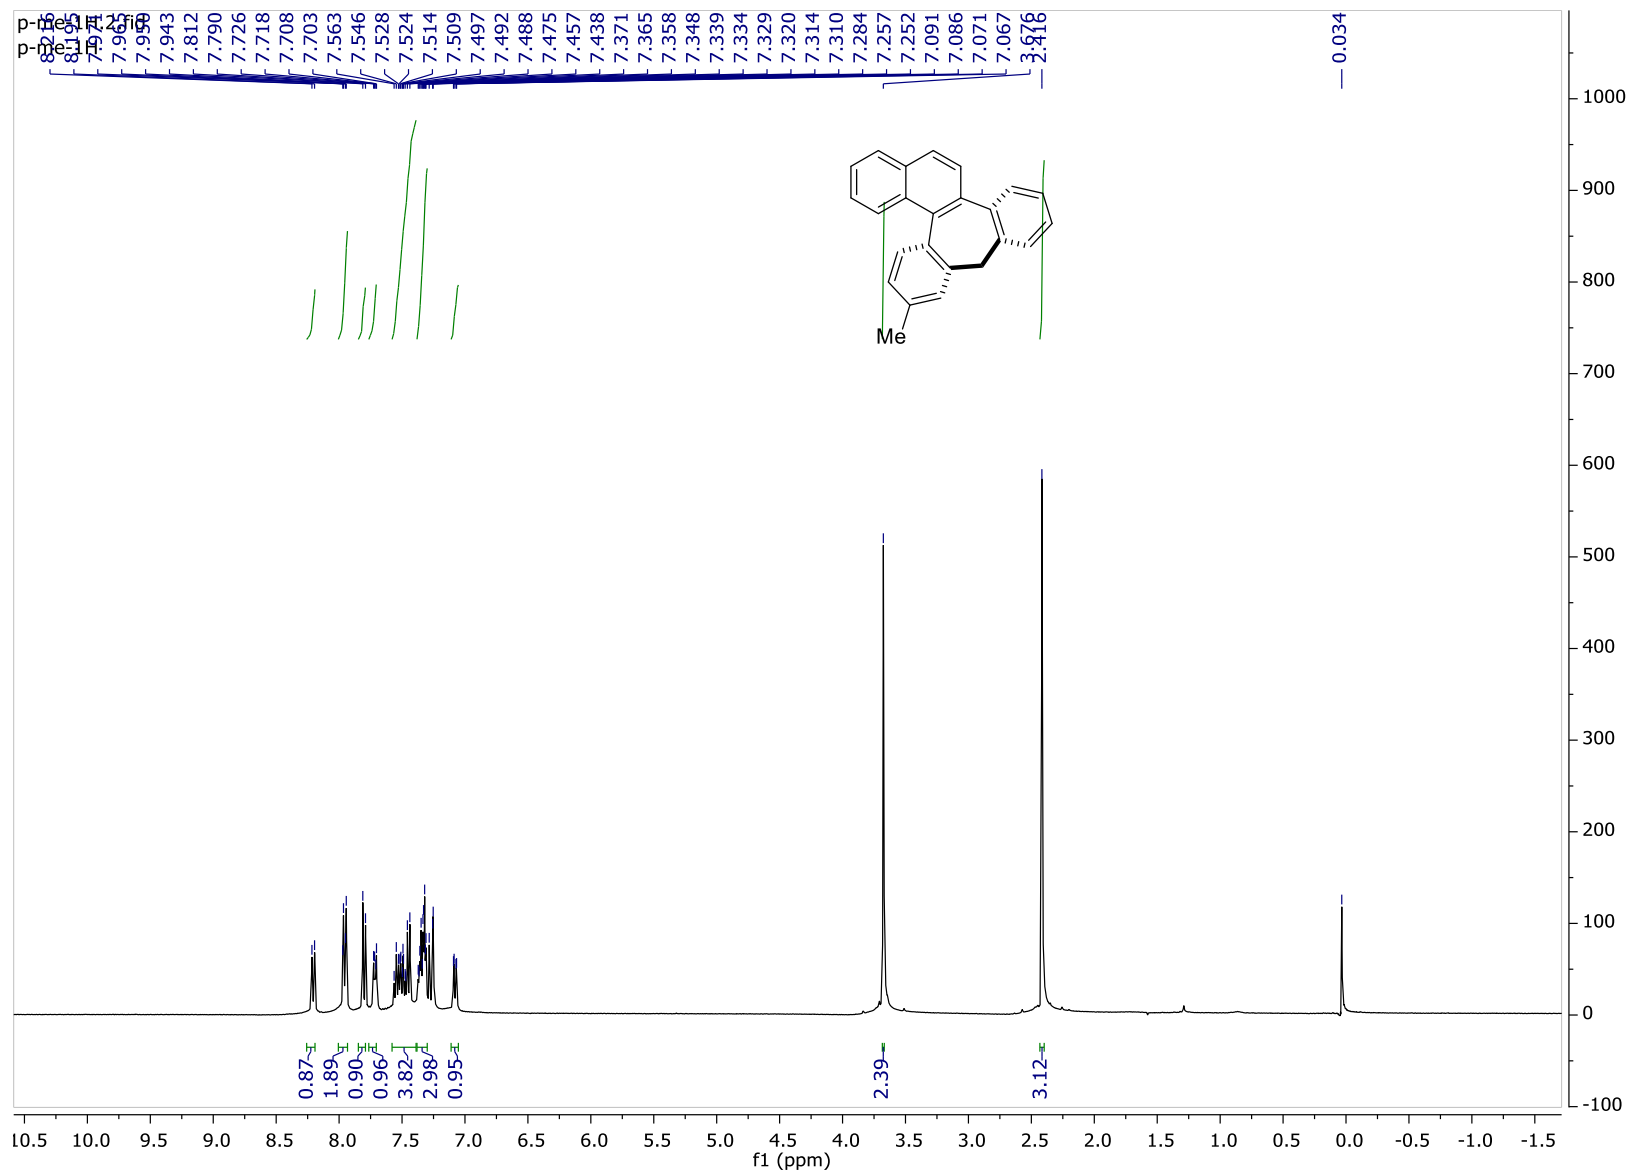

# <sup>13</sup>C Spectrum of 3c

ARC-P-ME-1-13C  
ARC-P-ME-13C

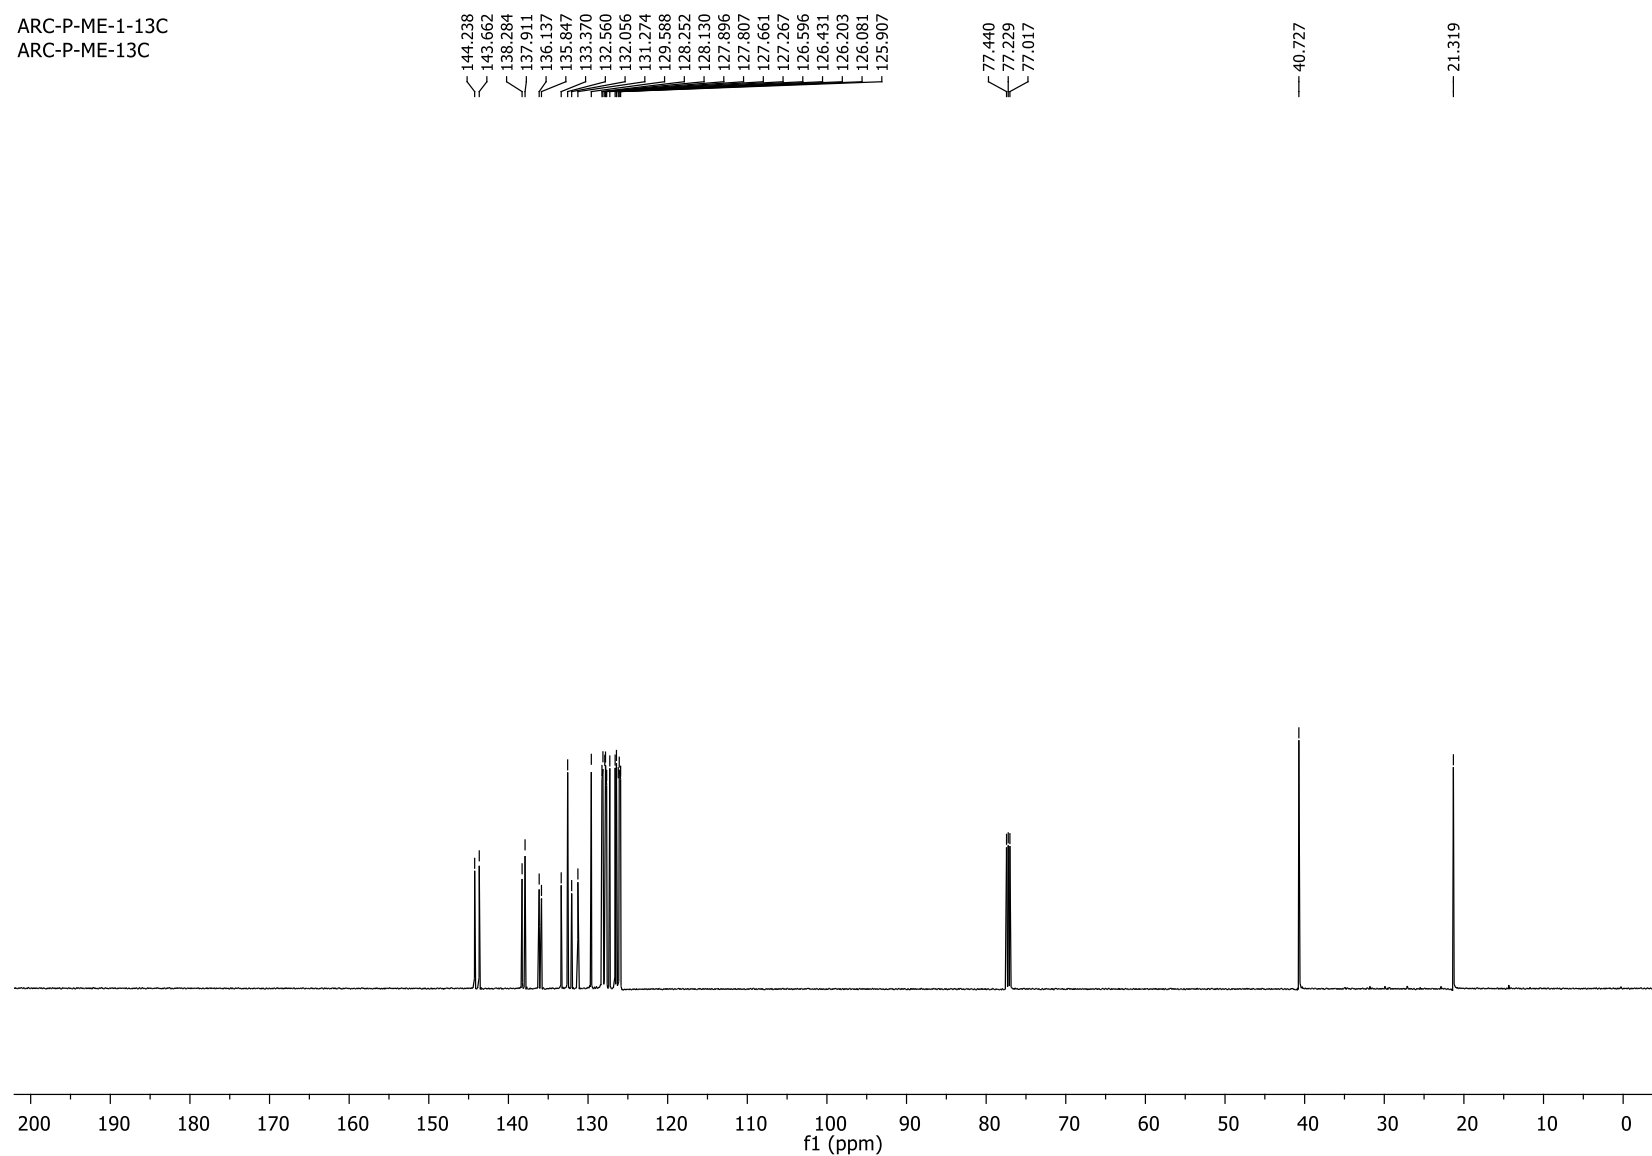

S30

# <sup>1</sup>H Spectrum of 3d

ARC-P-ME-ME-1H  
ARC-ME-ME-P-2--1H

8.209  
8.188  
8.098  
8.078  
7.703  
7.697  
7.689  
7.681  
7.632  
7.576  
7.559  
7.541  
7.490  
7.469  
7.449  
7.390  
7.371  
7.328  
7.313  
7.306  
7.294  
7.288  
7.280  
7.271  
7.266  
7.248  
7.208  
7.043  
3.923  
2.806  
2.375

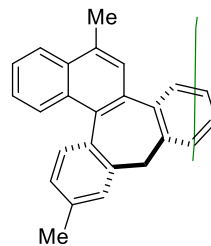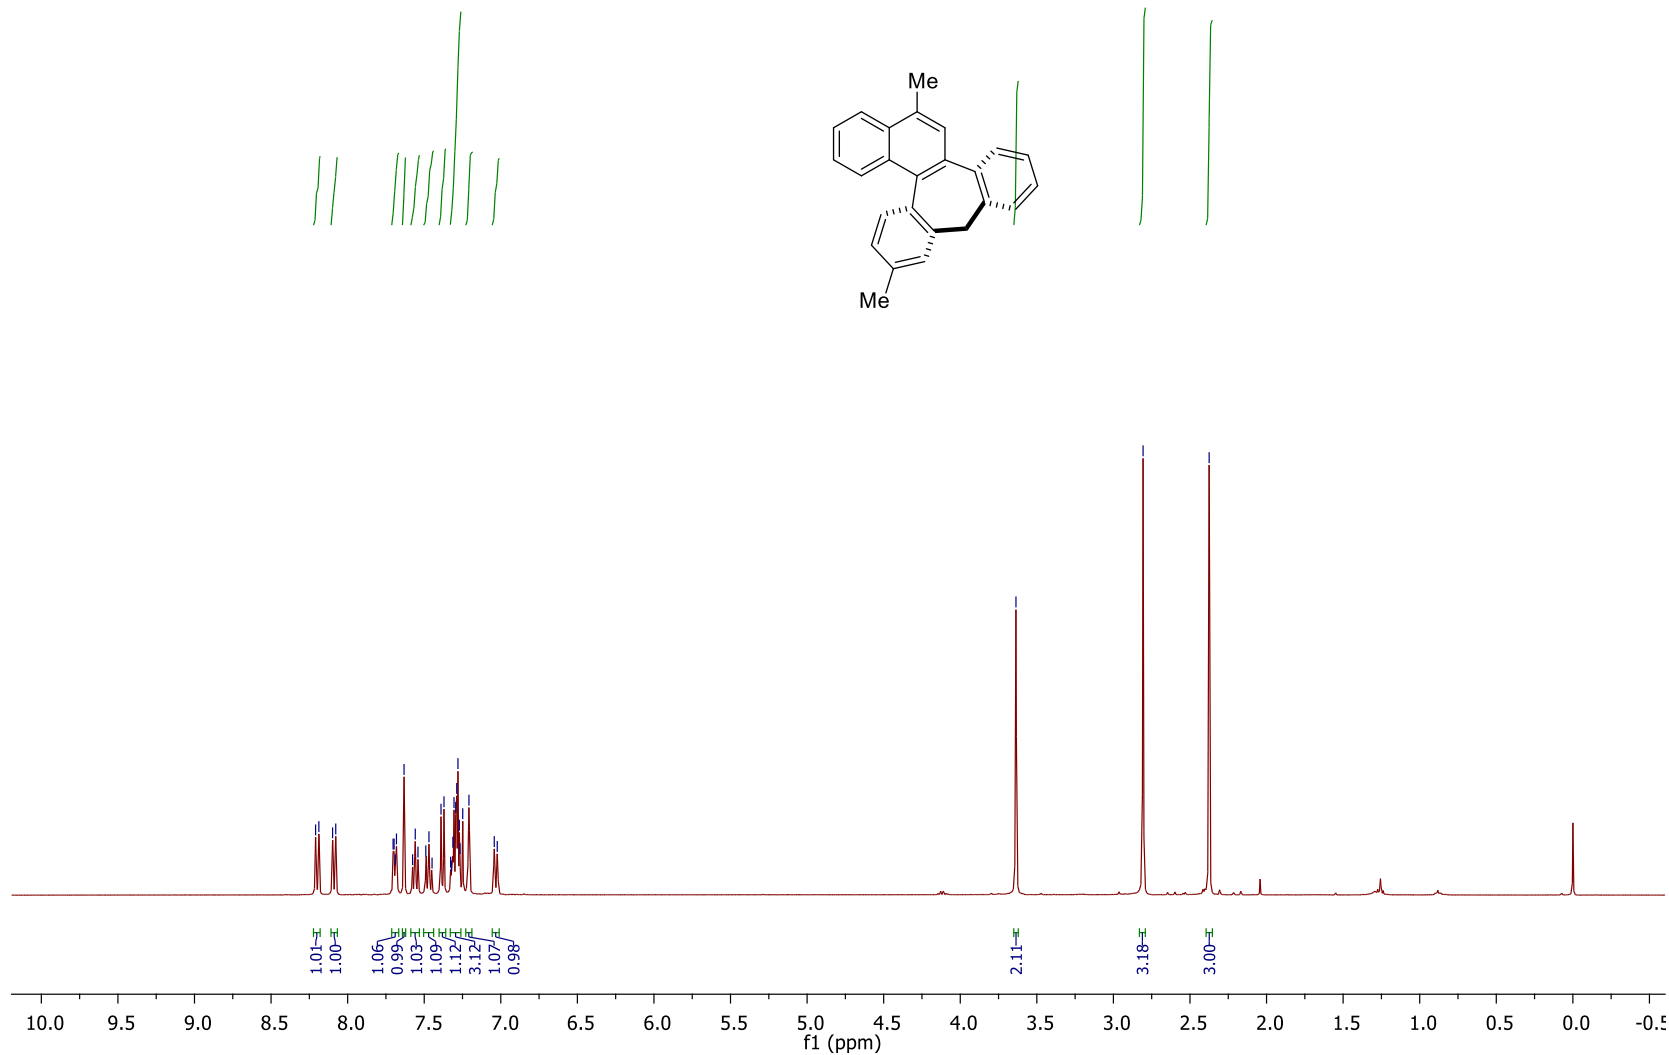

# <sup>13</sup>C Spectrum of **3d**

ARC-ME-ME-P-2--13C  
ARC-ME-ME-P-2--13C

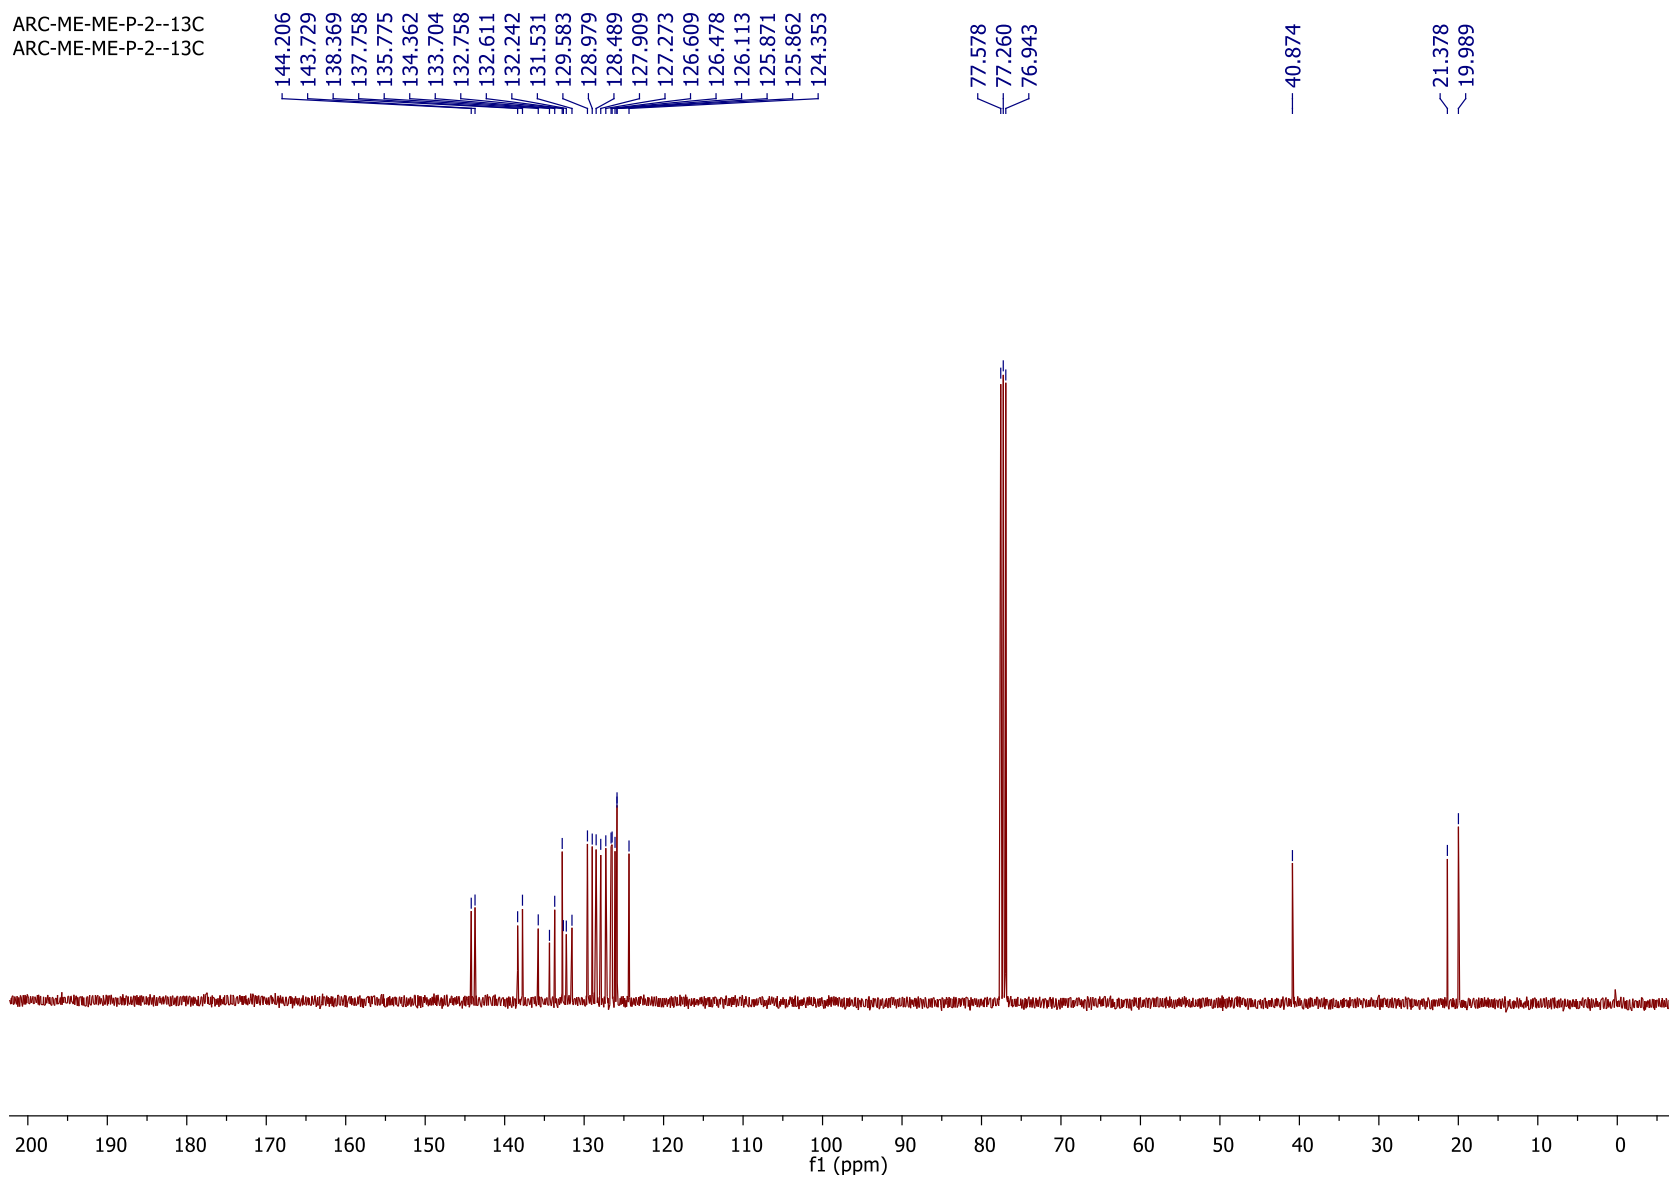



# <sup>1</sup>H Spectrum of **3e**

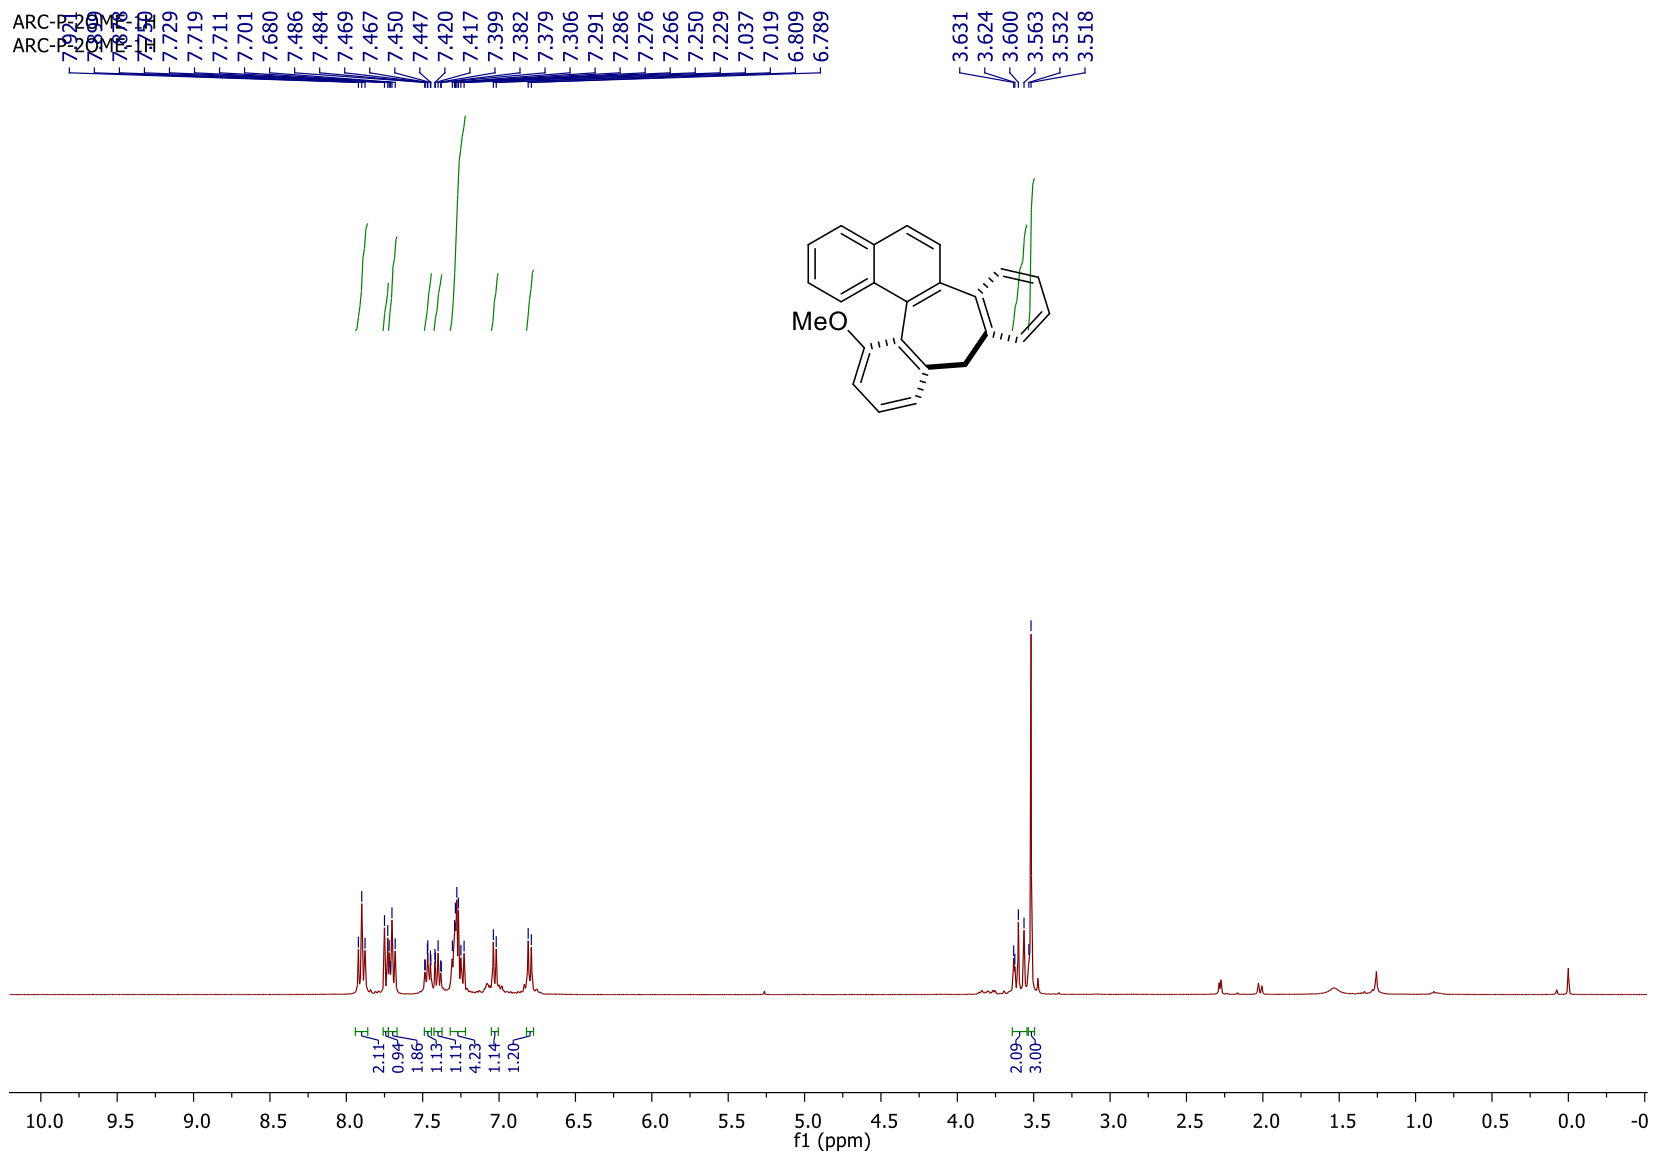

# <sup>13</sup>C Spectrum of 3e

ARC-P-2OME-13C  
ARC-P-2OME-13C

157.761  
129.365  
129.214  
128.427  
128.239  
128.075  
126.773  
126.523  
125.691  
125.637  
119.907  
109.152

77.577  
77.260  
76.942

55.417

40.811

ARC-P-2OME-13C  
ARC-P-2OME-13C

138.987  
136.911

132.597  
132.264  
131.731  
129.365  
129.214  
128.427  
128.239  
128.075  
127.844

ARC-P-2OME-13C  
ARC-P-2OME-13C

146.285  
143.919

138.587  
136.911

129.214  
128.427  
128.239  
128.075  
126.773  
126.523  
125.691  
125.637  
122.852

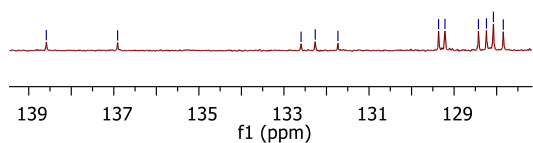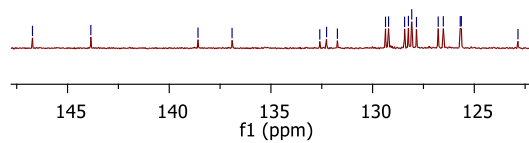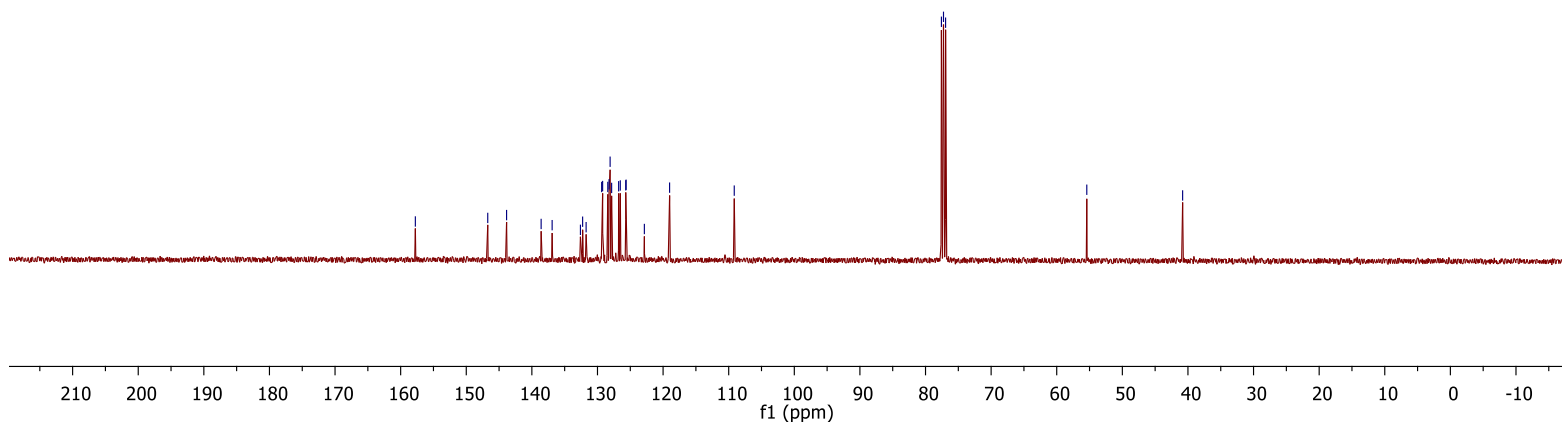

# <sup>1</sup>H Spectrum of **3f**

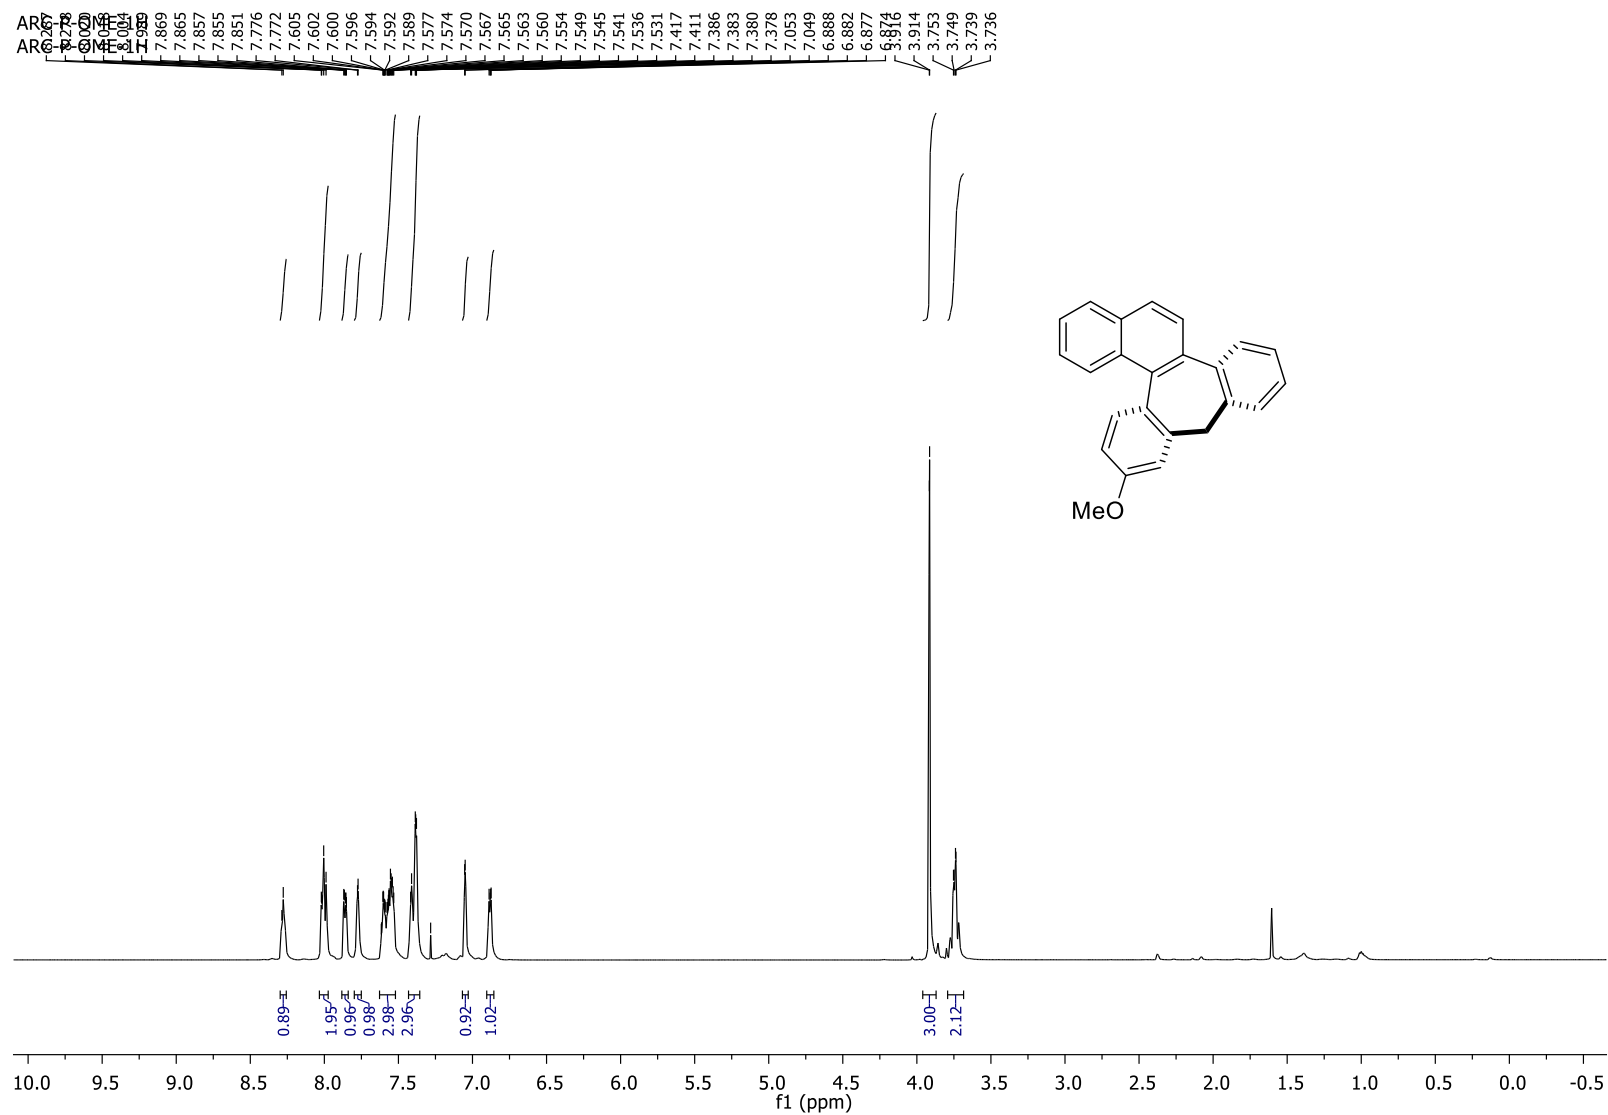

# <sup>13</sup>C Spectrum of 3f

ARC-P-OME-13C  
ARC-P-OME-13C

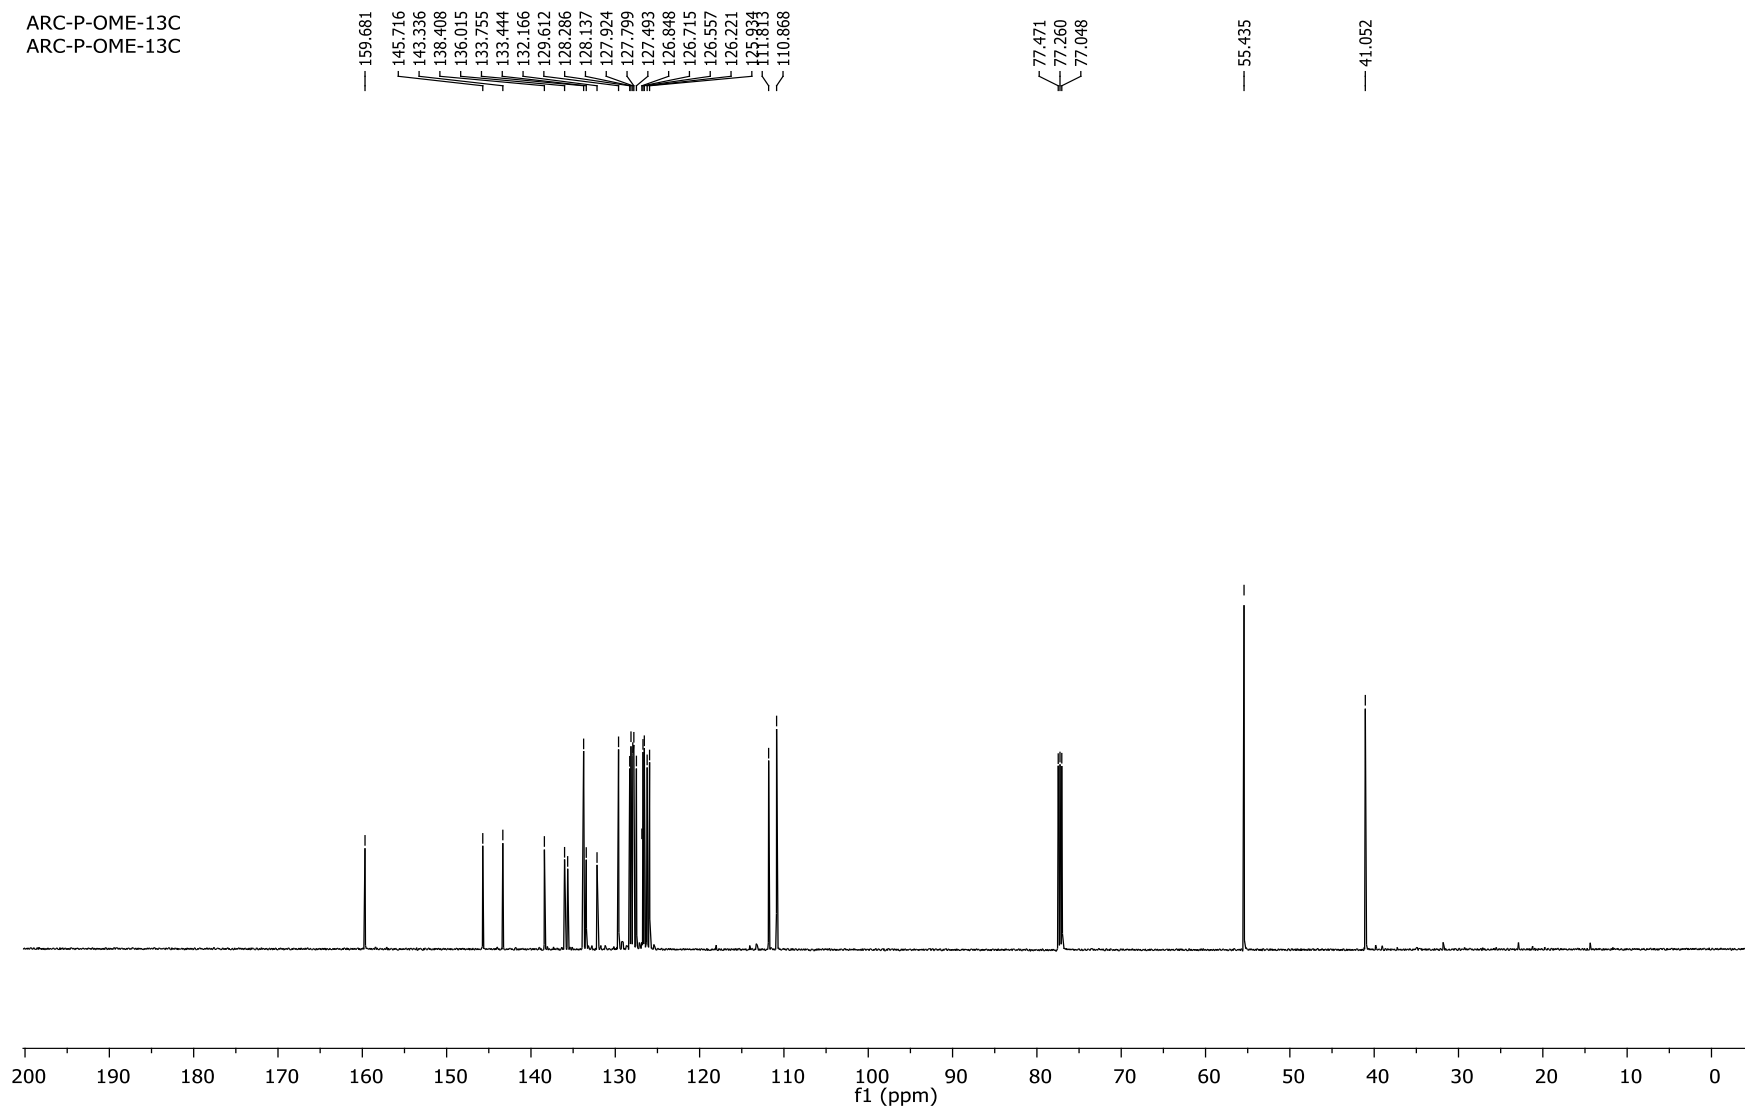

# <sup>1</sup>H Spectrum of 3h

ARC-P-3-OME-L-1H  
ARC-P-3-OME-L-1H

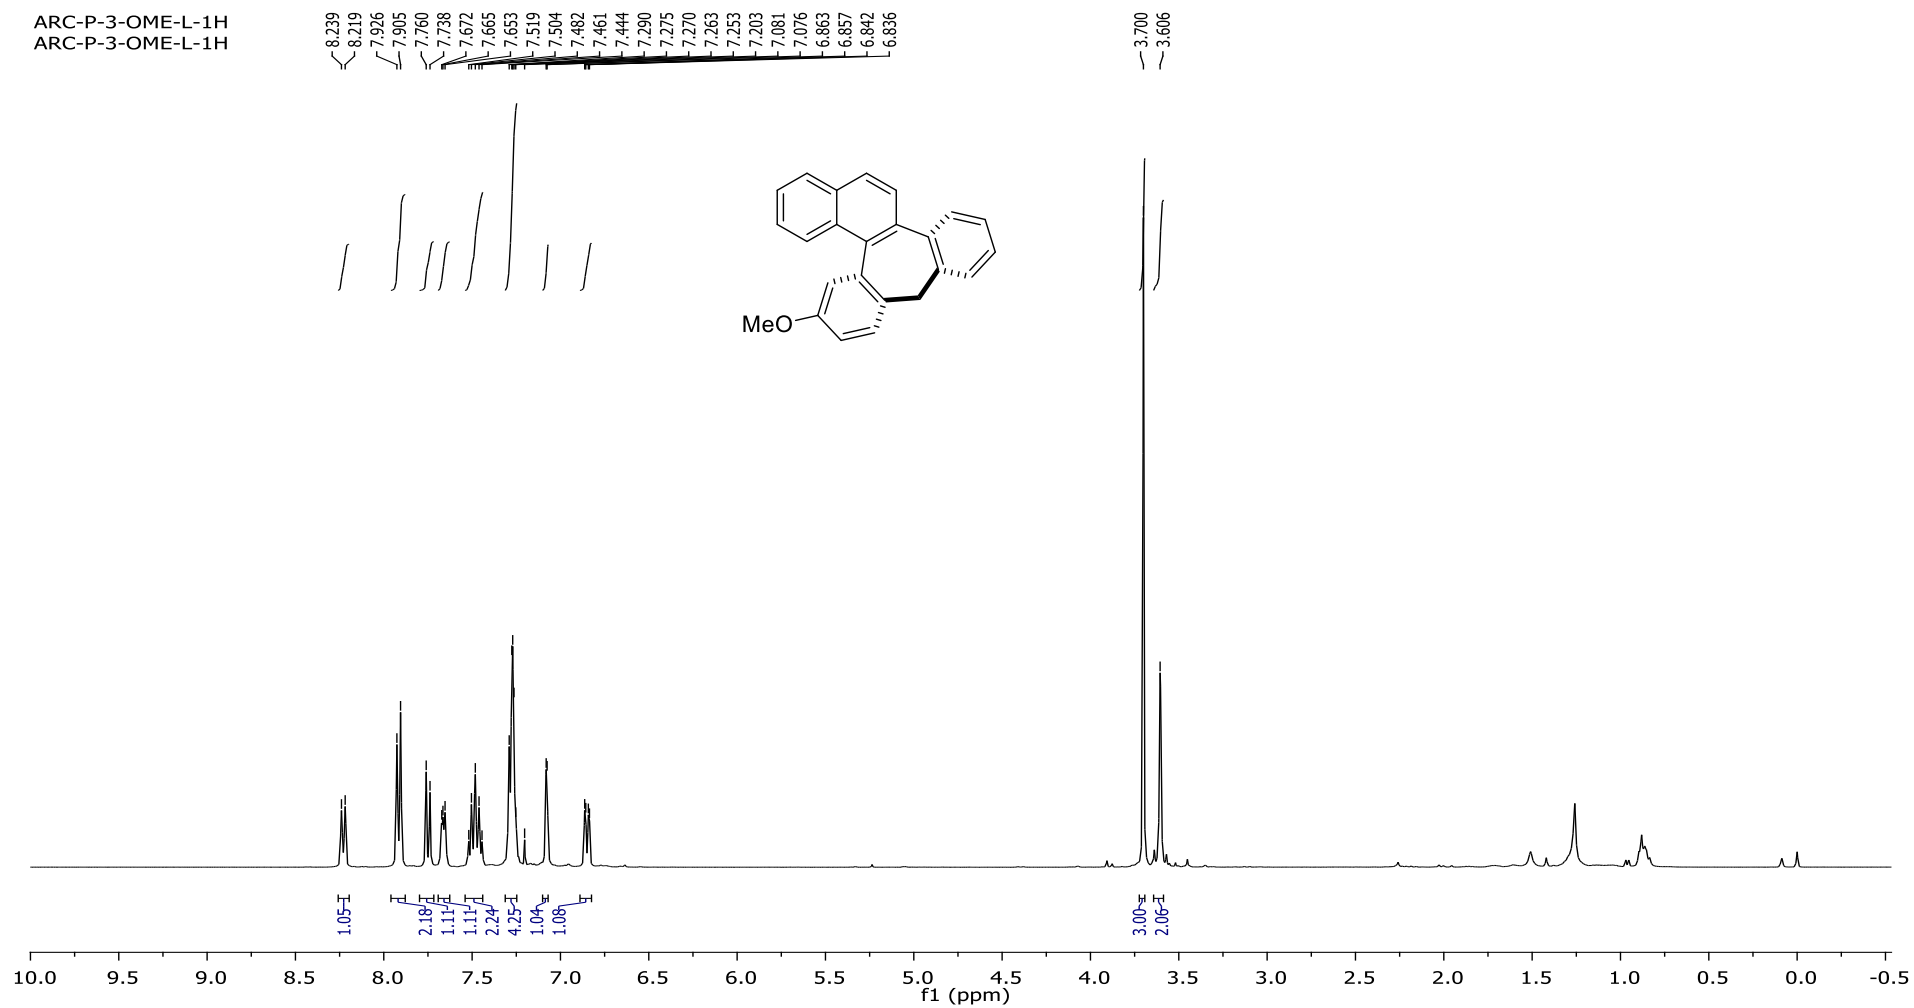

# <sup>13</sup>C Spectrum of 3h

ARC-P-3-OME-L-13C  
ARC-P-3-OME-L-13C

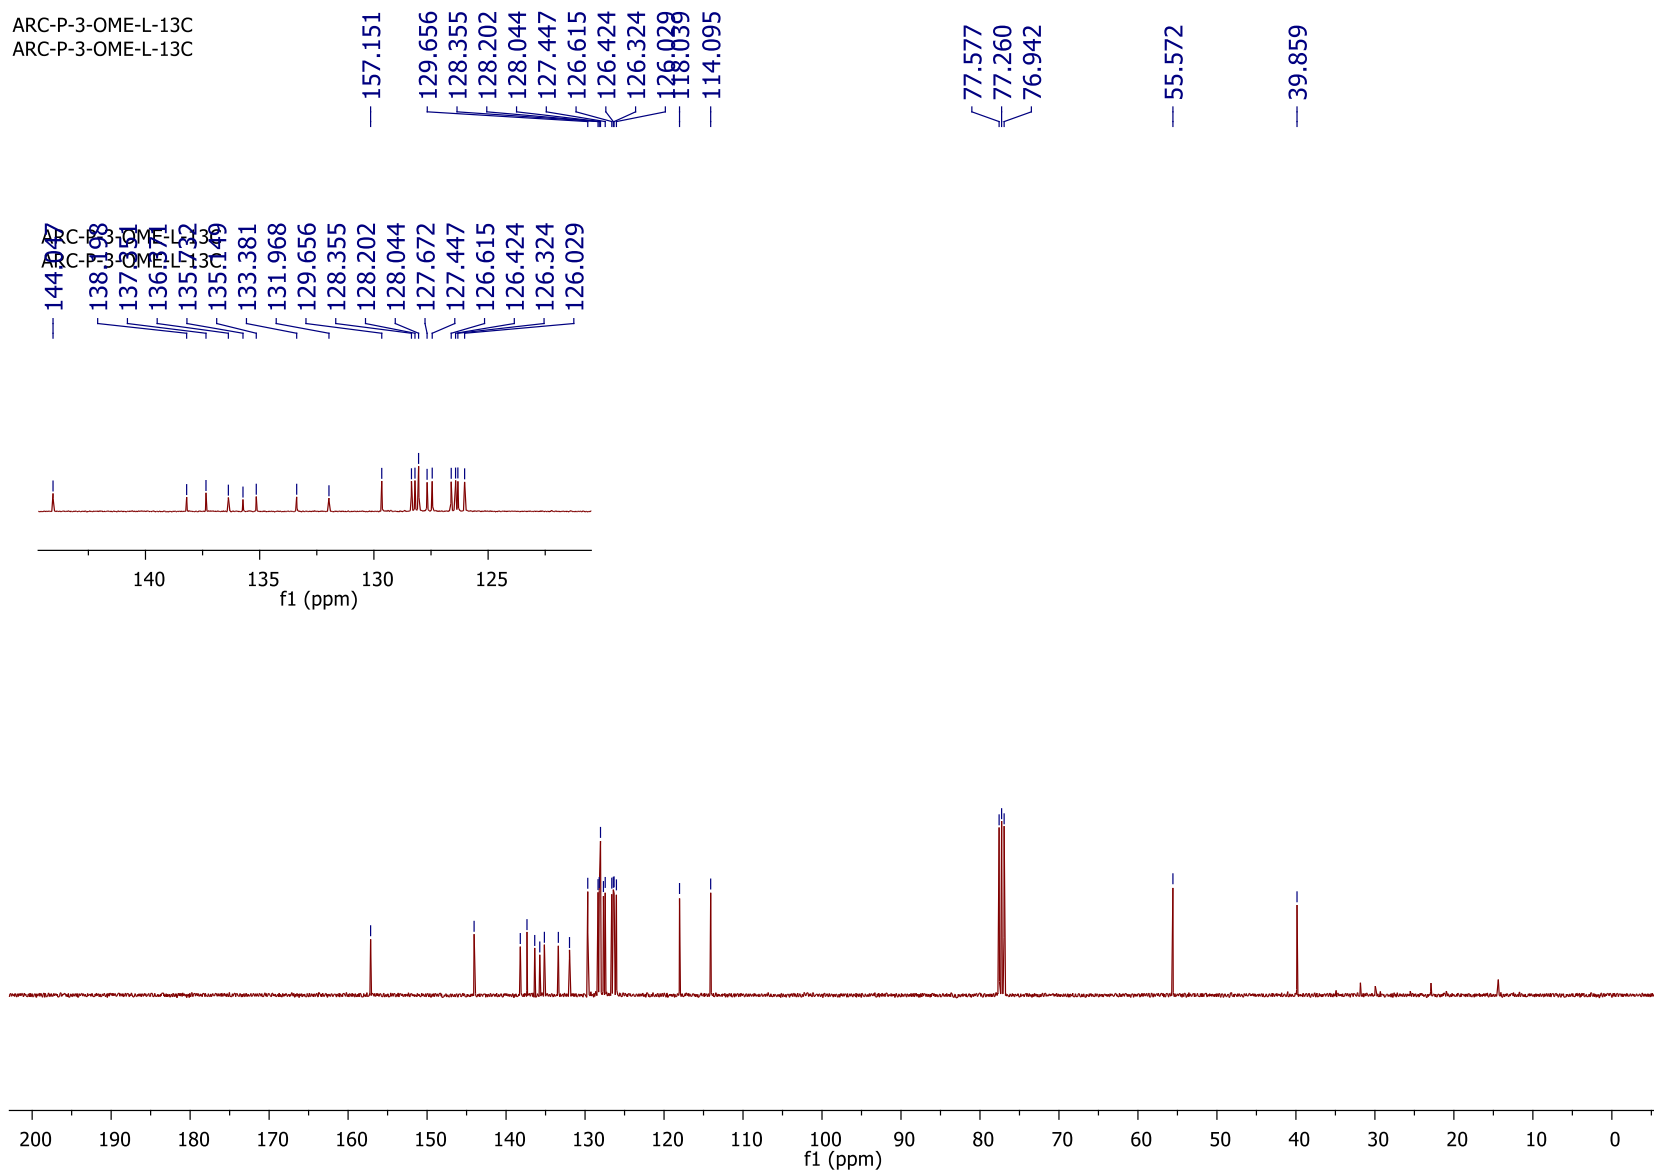

# <sup>1</sup>H Spectrum of 4h

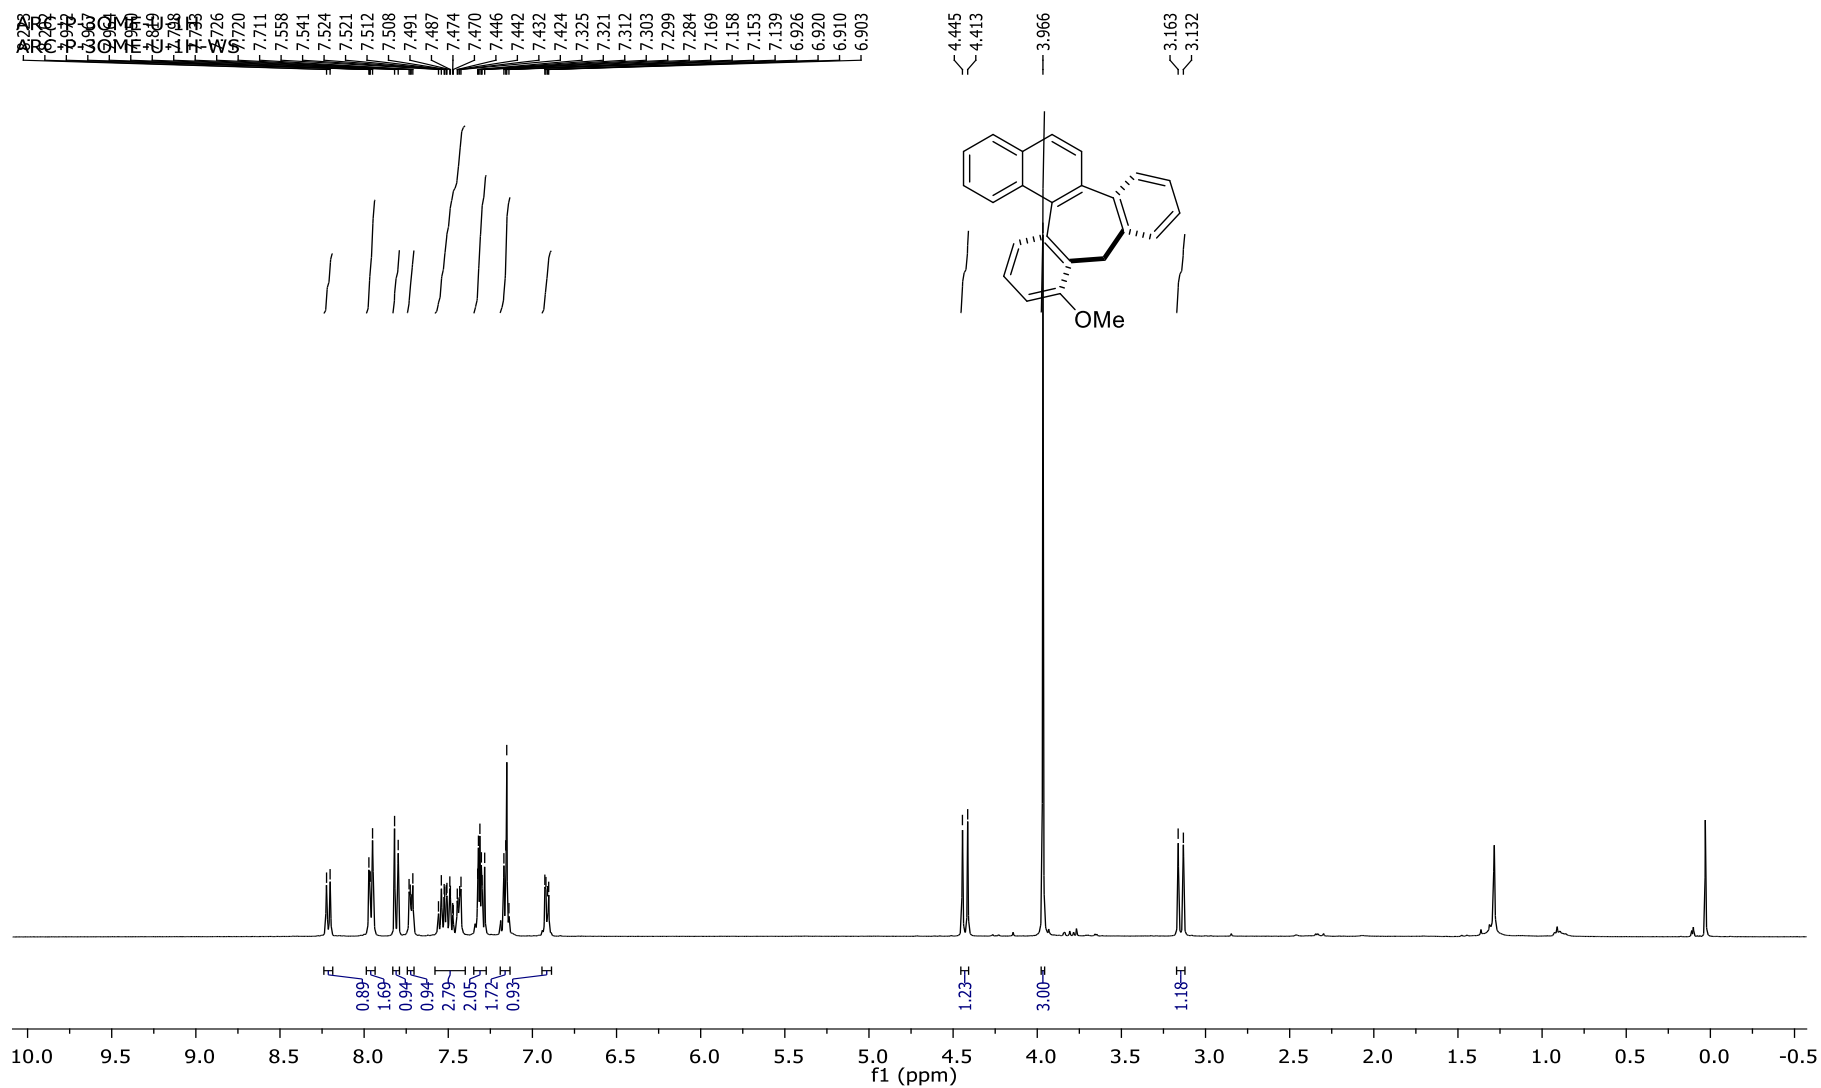

# <sup>13</sup>C Spectrum of 4h

ARC-P-3-OME-U-13C  
ARC-P-3-OME-U-13C

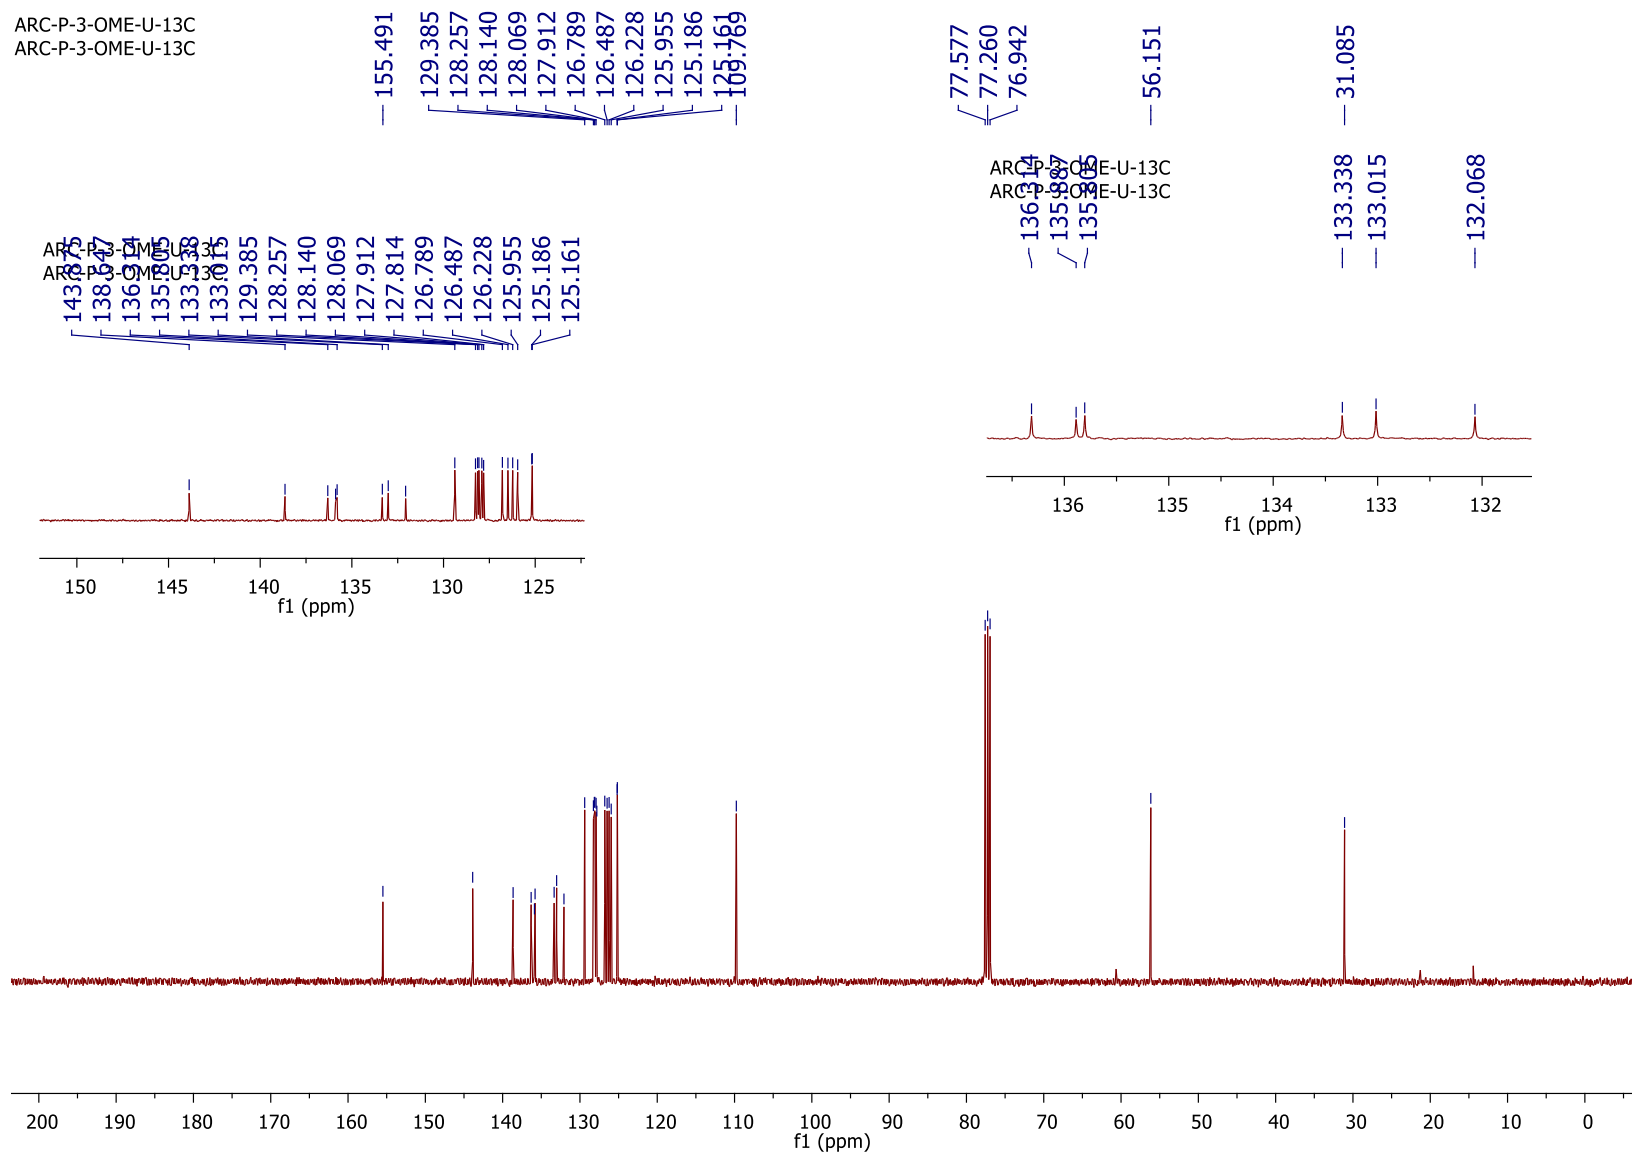



# <sup>1</sup>H Spectrum of **3i**

ARC-P-ME-OME-PP-WS  
ARC-P-ME-OME-PP-WS

8.191 8.171 8.090 8.070  
7.698 7.692 7.678 7.623 7.555 7.552 7.488 7.470 7.470 7.466 7.407 7.386 7.306 7.296 7.286 7.280 7.272 7.272 6.933 6.926 6.786 6.779 6.764 5.838 3.715 3.674 3.643 3.633 3.602 — 2.795

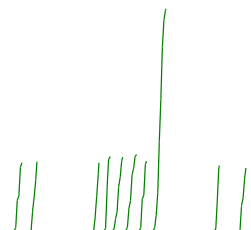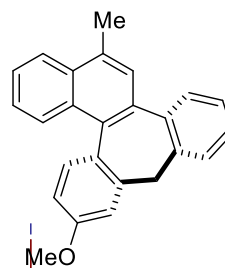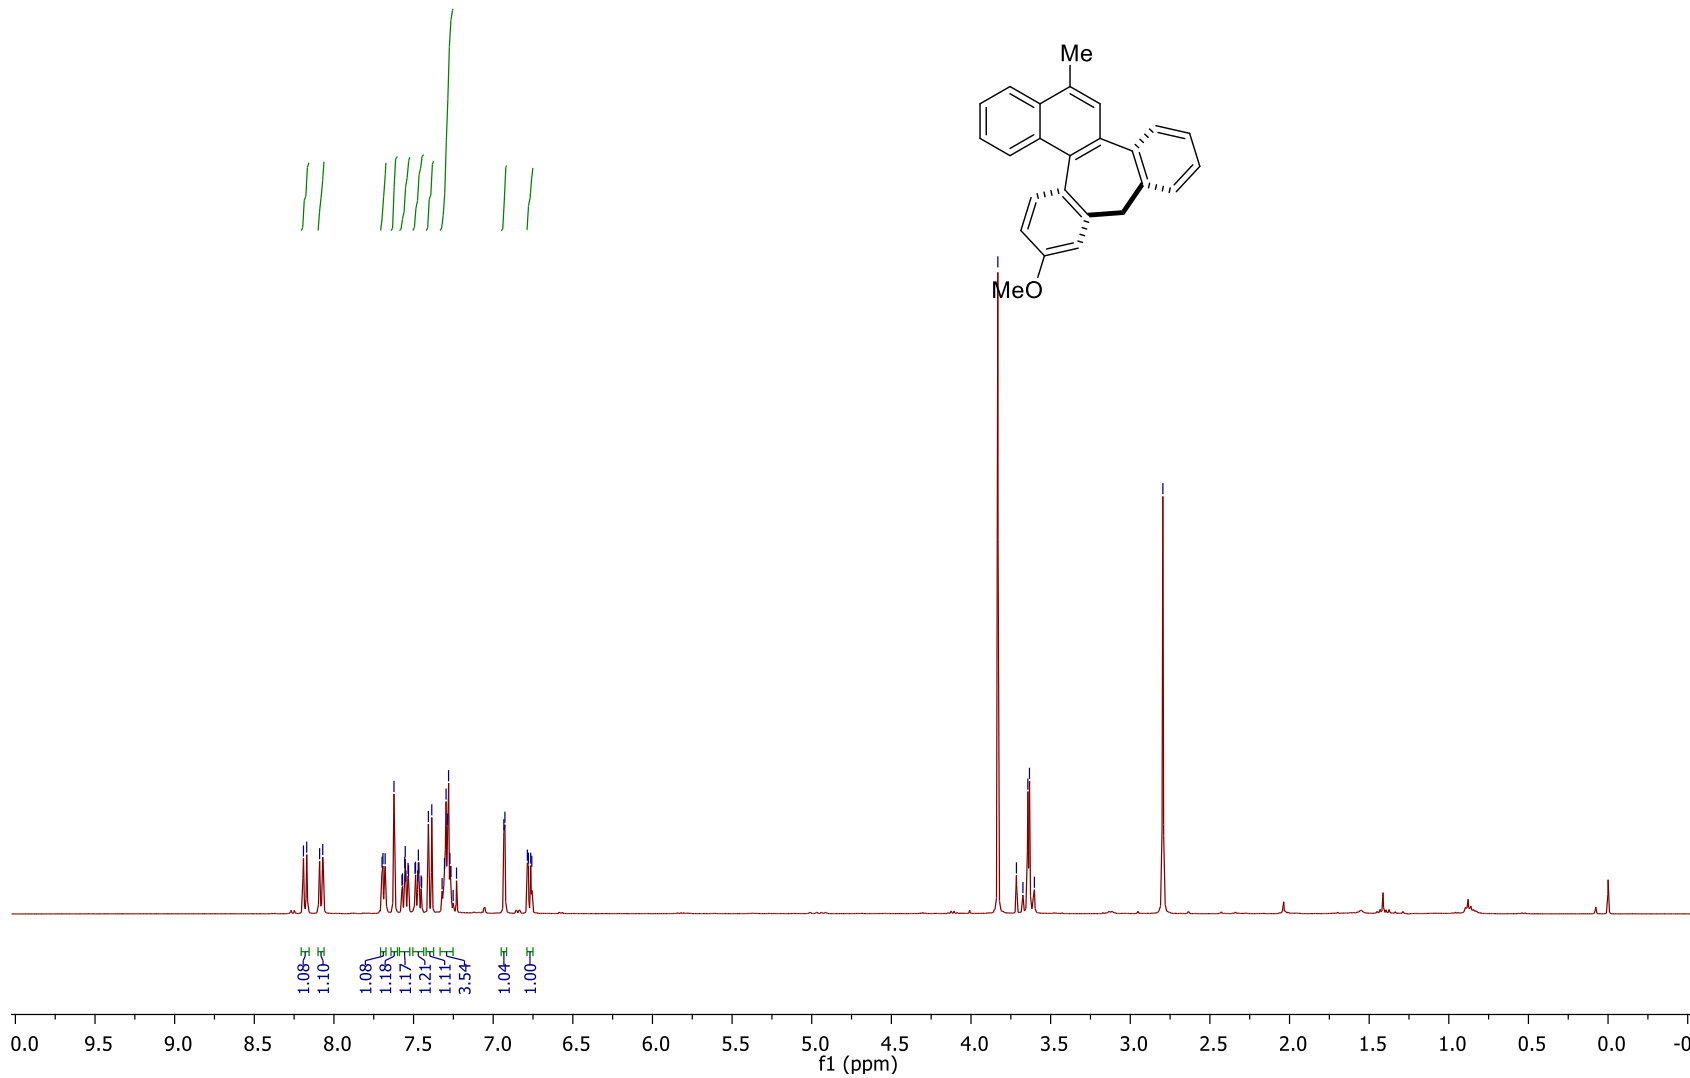

S41

# <sup>13</sup>C Spectrum of **3i**

ARC-P-ME-OME--13C  
ARC-P-ME-OME--13C

159.546  
143.344  
133.876  
133.478  
129.551  
128.928  
128.422  
127.876  
126.672  
126.551  
125.840  
124.352  
111.762  
110.875

77.578  
77.260  
76.943

55.456

41.137

19.941

ARC-P-ME-OME--13C  
ARC-P-ME-OME--13C

134.176  
133.876  
133.478  
132.638  
132.316

129.551  
128.928  
128.422  
127.876  
127.066  
126.672  
126.551  
125.840

ARC-P-ME-OME--13C  
ARC-P-ME-OME--13C

138.431

135.605

134.110

133.876

133.478

132.638

132.316

129.551  
128.928

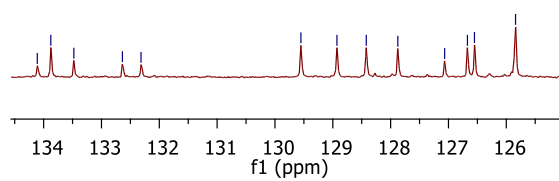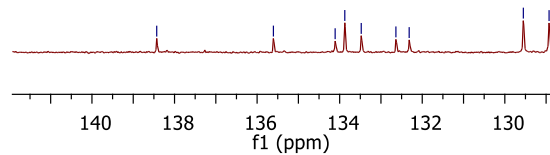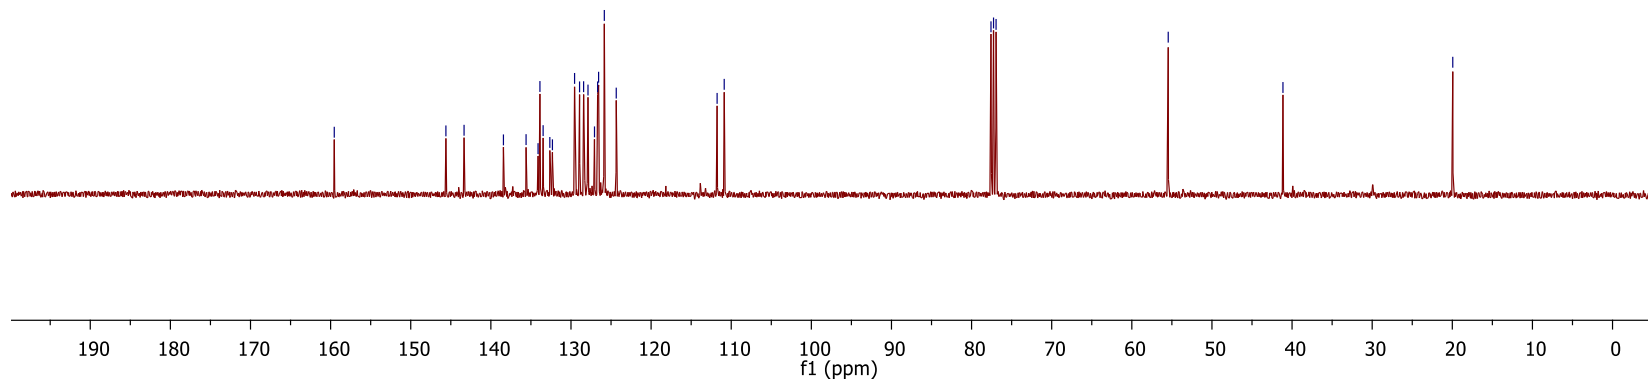

# <sup>1</sup>H Spectrum of 3j

ARC-P-Me-20Me-L-1H  
ARC-P-Me-20Me-L-1H

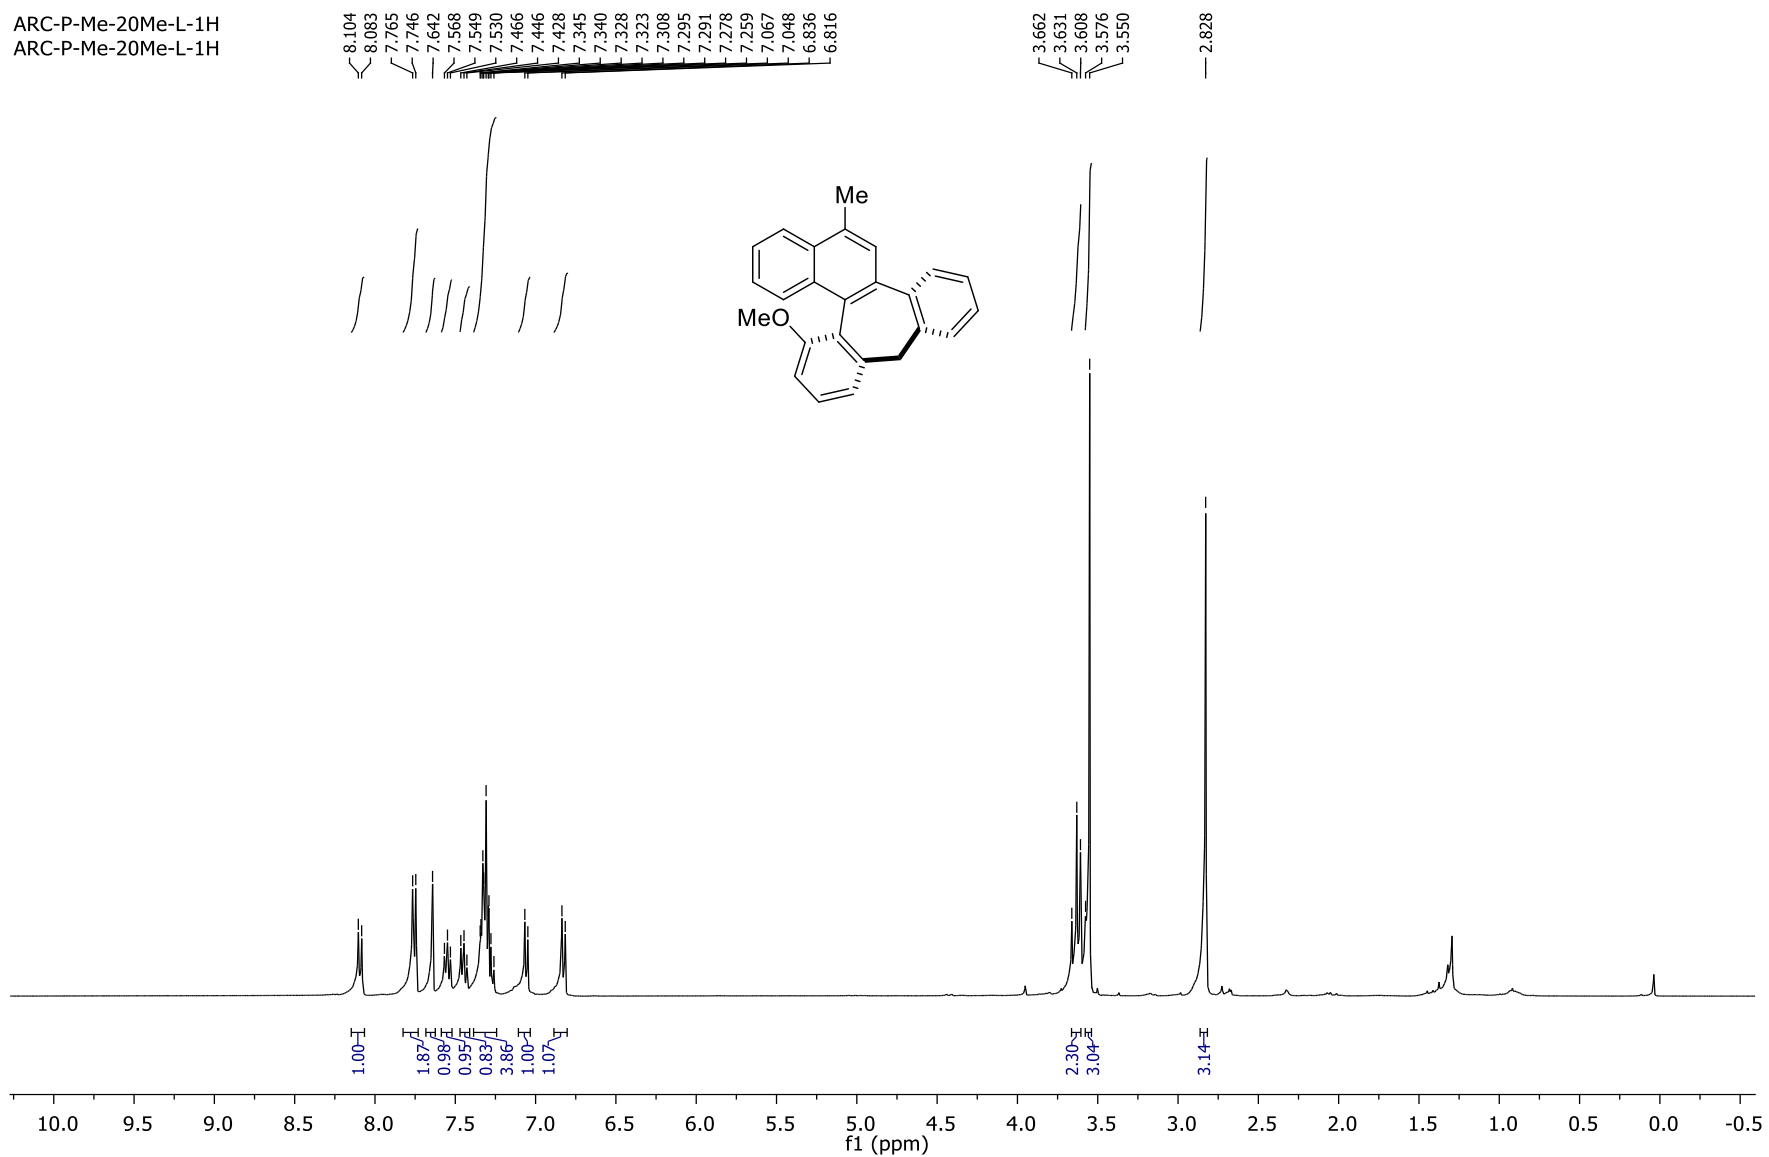

# <sup>13</sup>C Spectrum of 3j

ARC-PME-2OME-L-600-13C  
13C

157.717  
129.161  
129.135  
129.081  
128.978  
127.777  
126.708  
126.483  
125.300  
124.138  
118.965  
109.041  
77.471  
77.260  
77.048  
55.395  
40.847  
19.983

ARC-PME-2OME-L-600-13C  
13C  
138.545  
136.493  
134.118  
131.757  
131.488  
129.161  
129.135  
129.081  
128.978  
127.777  
126.708  
126.483  
125.581  
125.300  
124.138  
122.973  
118.965

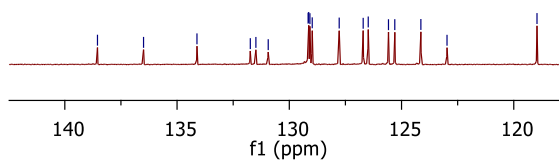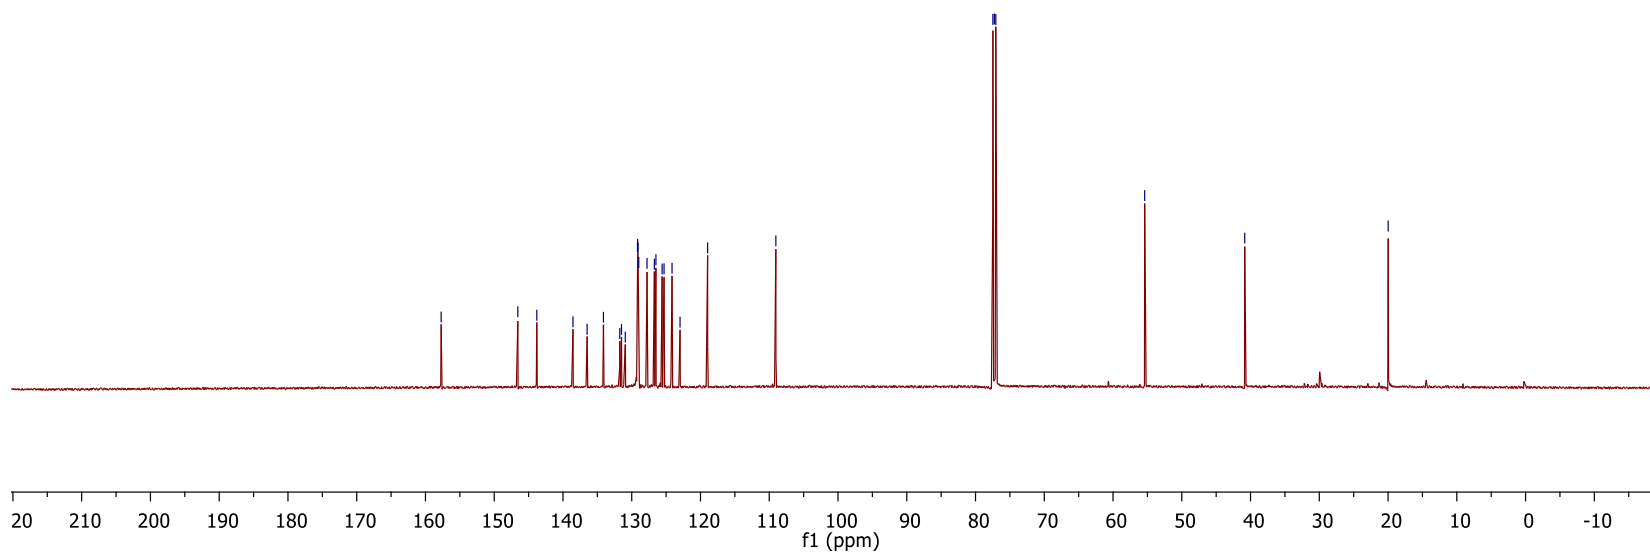

# <sup>1</sup>H Spectrum of 3k

ARC-P-ACETAL-L-1-WS  
ARC-P-ACETAL-L-1-WS

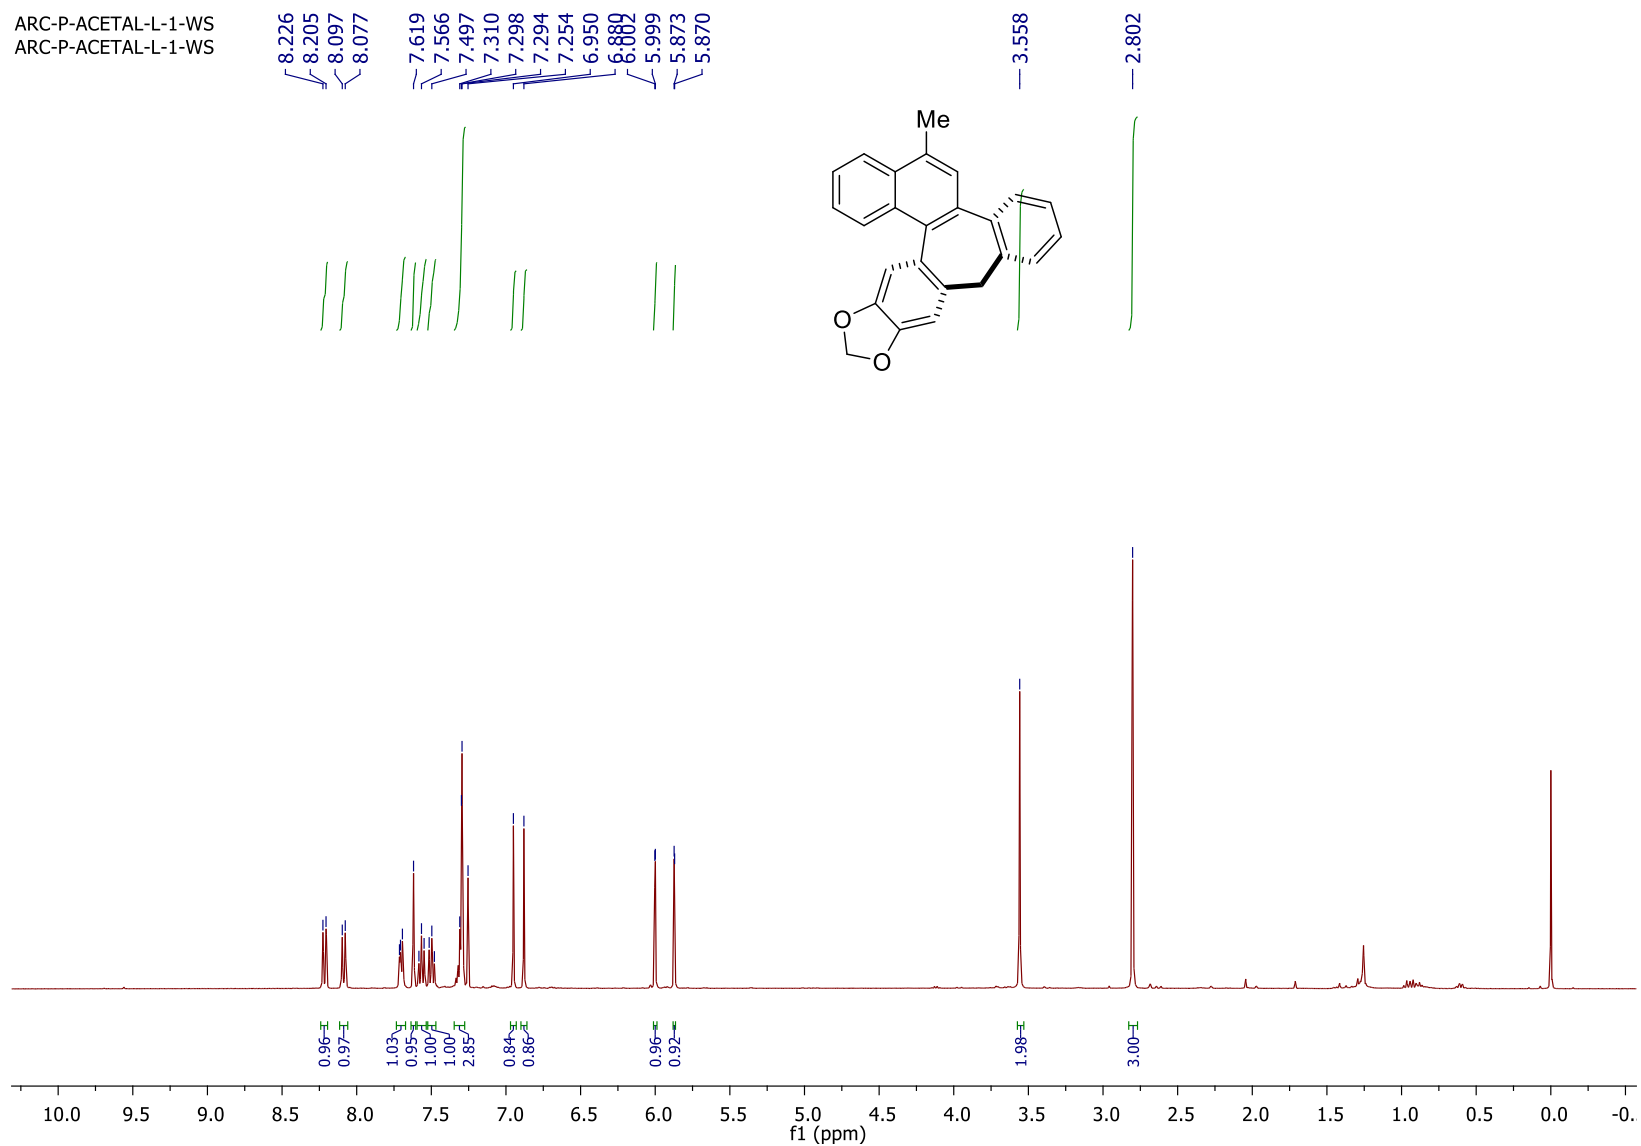

# <sup>13</sup>C Spectrum of **3k**

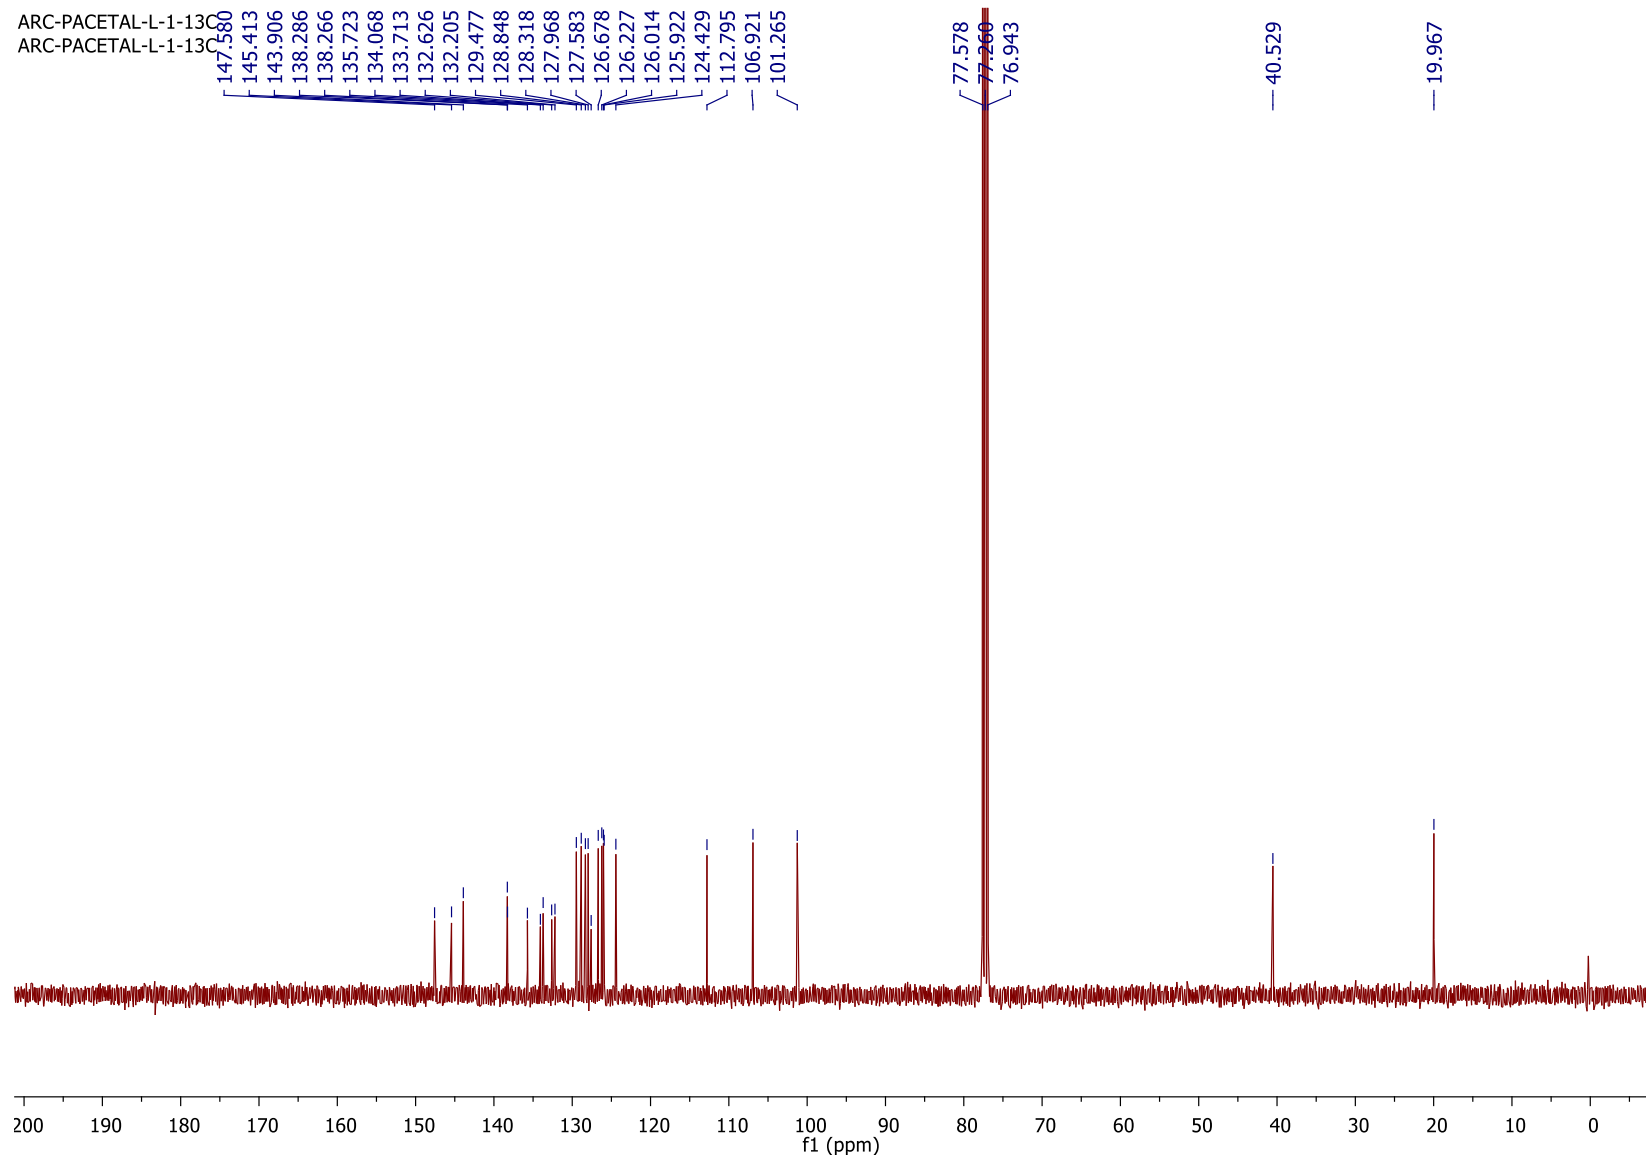

# <sup>1</sup>H Spectrum of 4k

ARC-P-ME-ACETAL-U-1H  
ARC-P-ACETAL-U-1H-WS

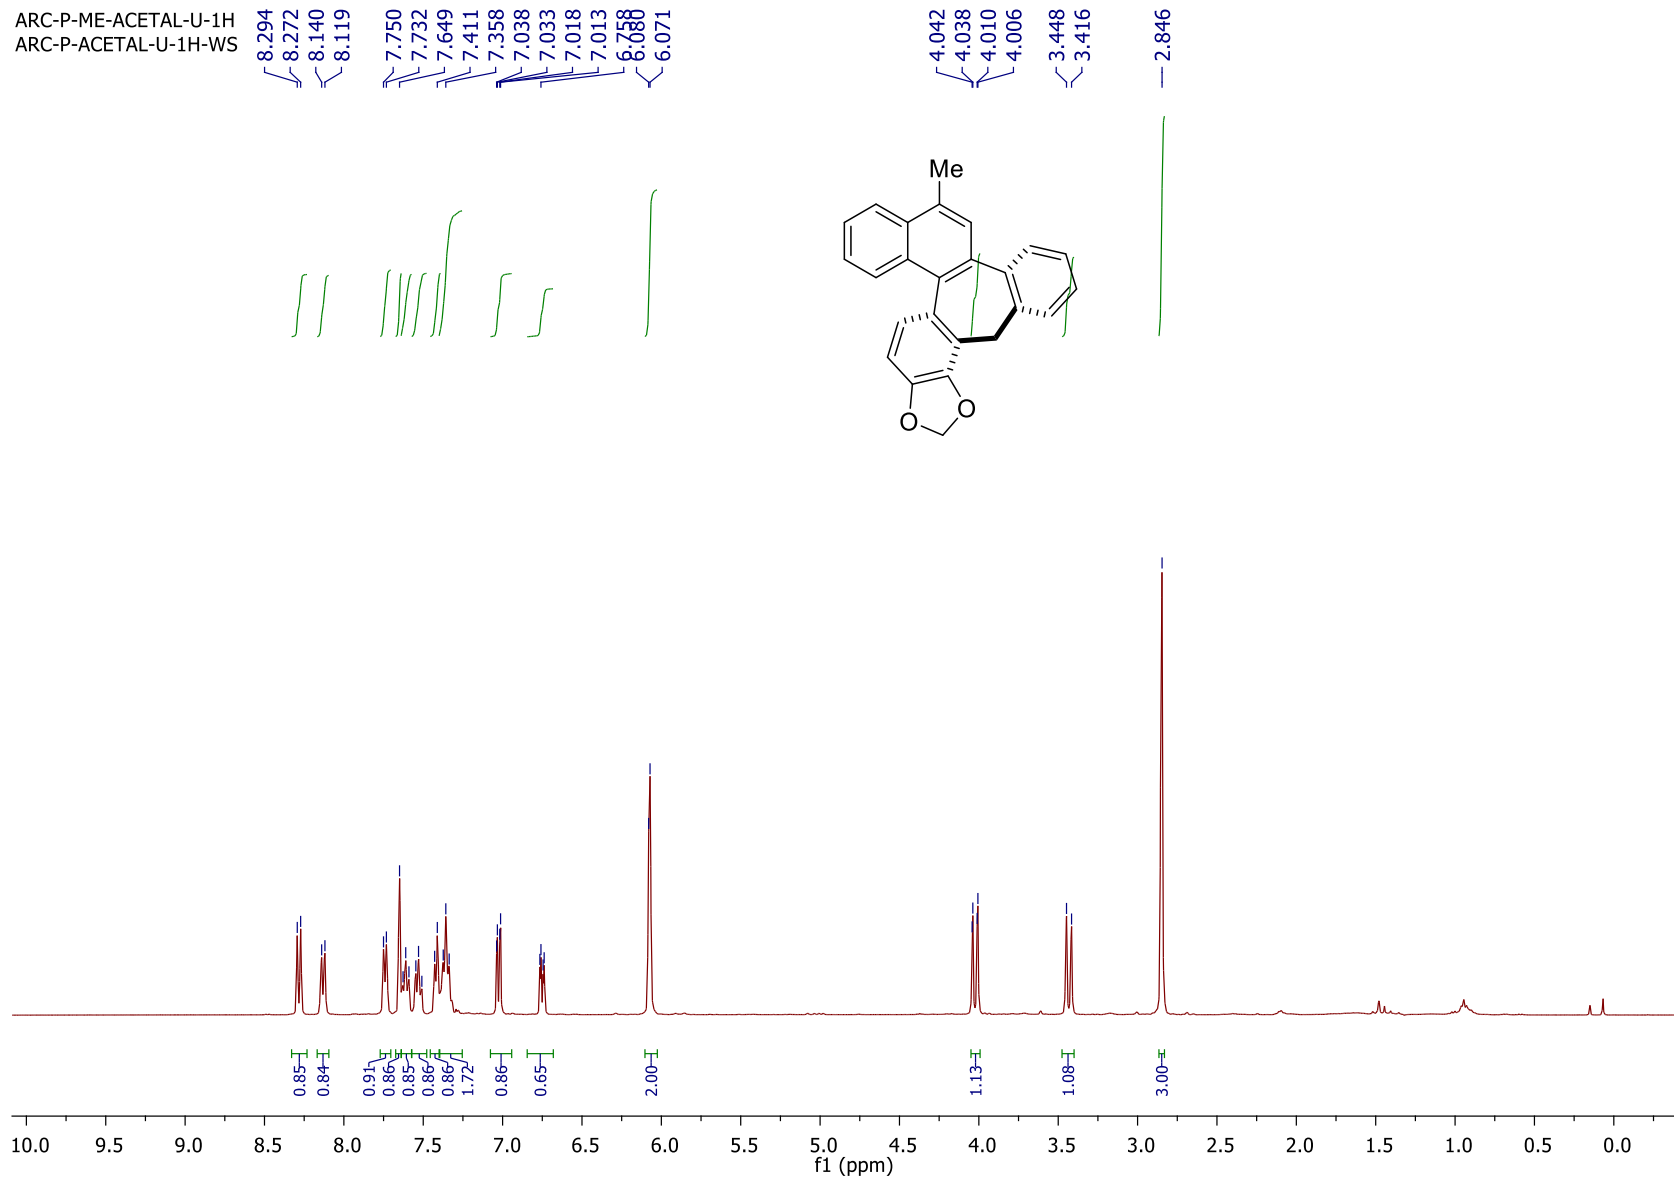

# <sup>13</sup>C Spectrum of 4k

ARC-P-ACETAL-U-13C  
ARC-P-ACETAL-L-13C

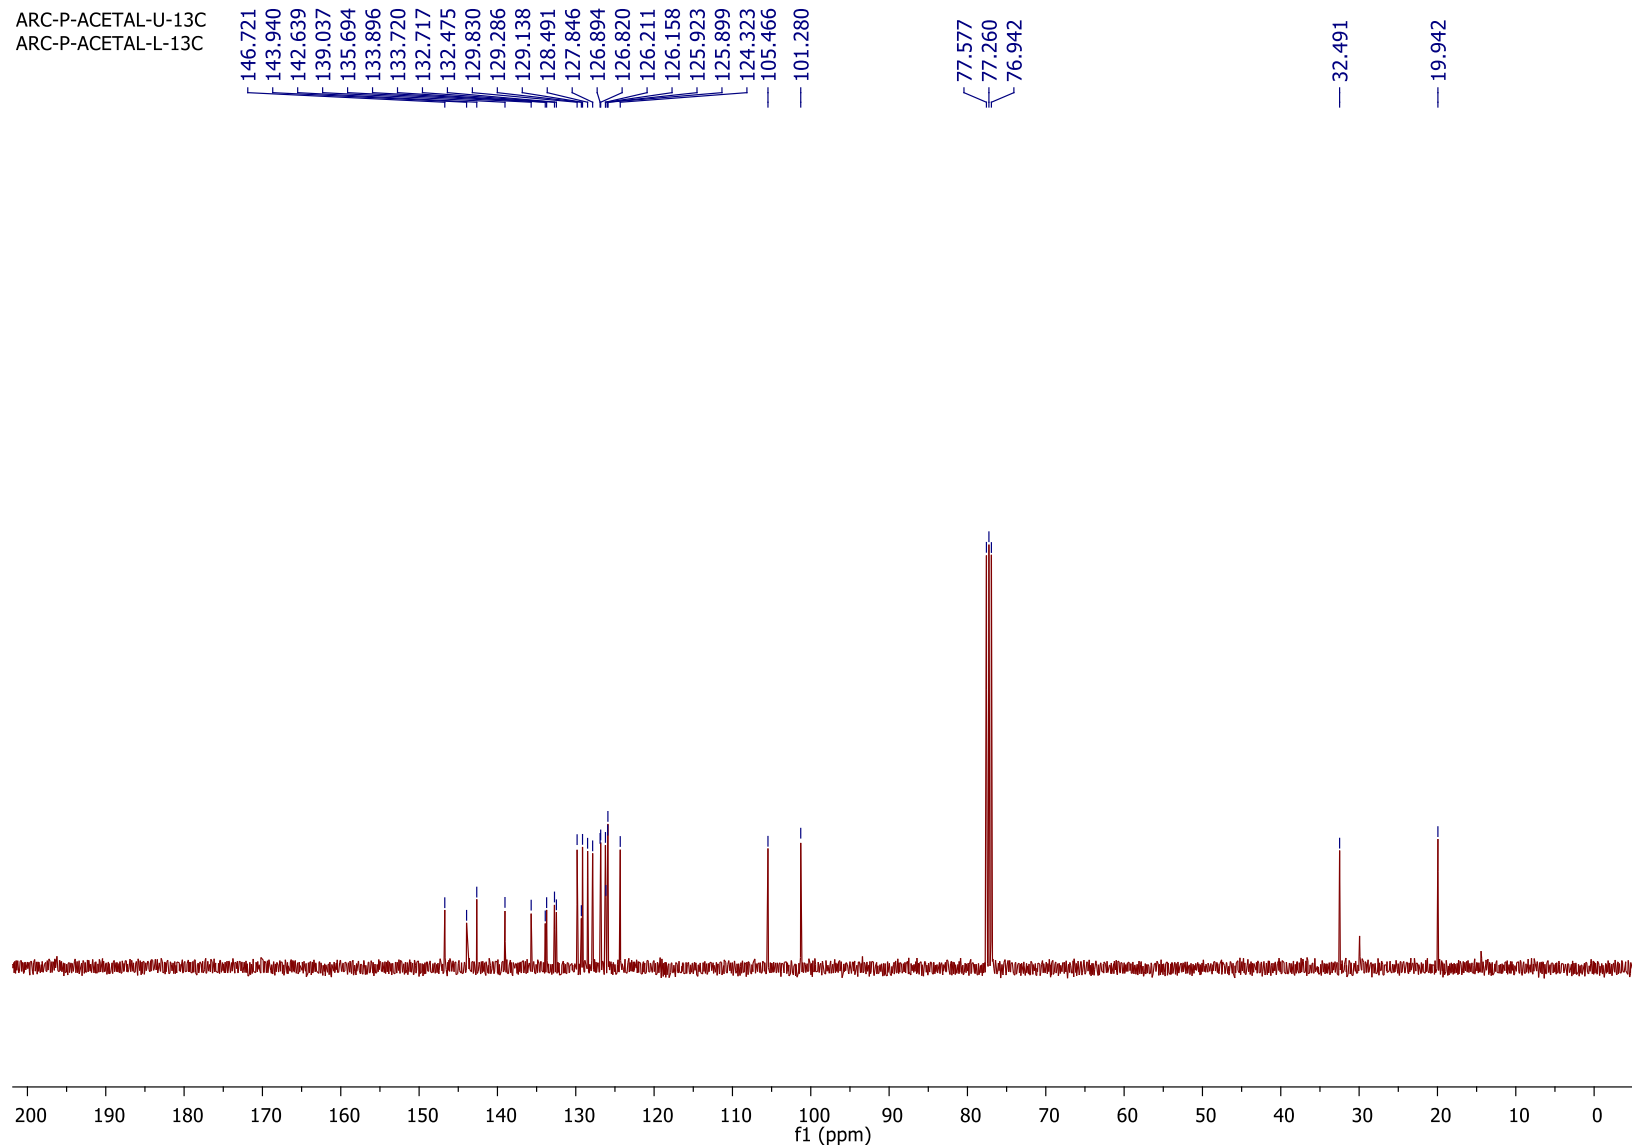



# <sup>1</sup>H Spectrum of **31**

8.127  
8.100  
7.991  
7.978  
7.970  
7.960  
7.808  
7.787  
7.728  
7.721  
7.717  
7.709  
7.704  
7.579  
7.563  
7.545  
7.542  
7.535  
7.531  
7.514  
7.497  
7.489  
7.469  
7.441  
7.436  
7.382  
7.377  
7.367  
7.358  
7.354  
7.346  
7.337  
7.333  
7.284  
7.249  
7.244  
7.228  
7.223  
3.677  
3.670

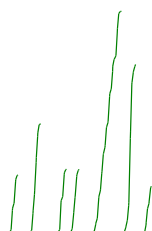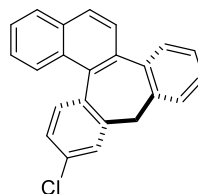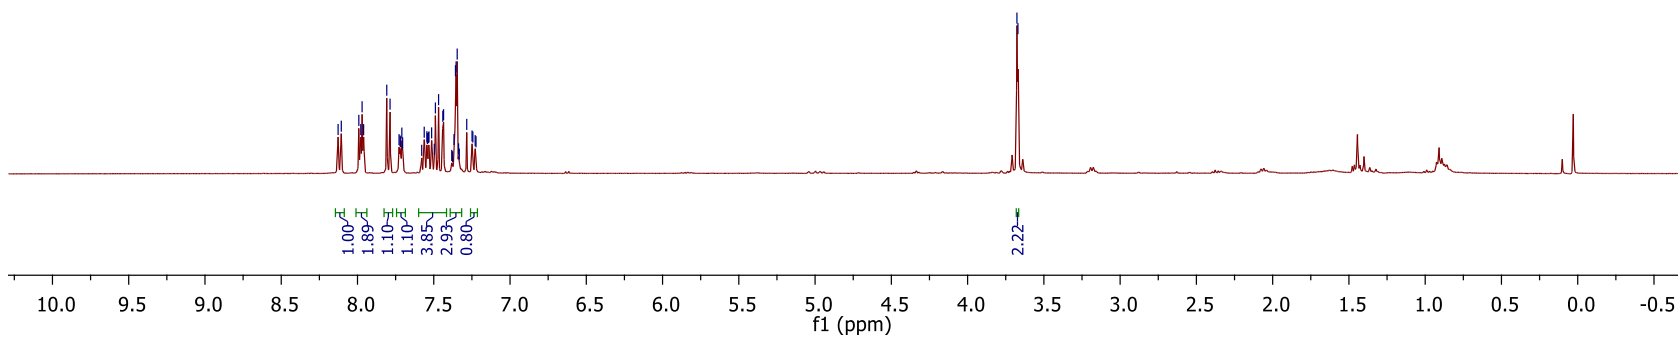

S49

# $^{13}\text{C}$ Spectrum of **31**

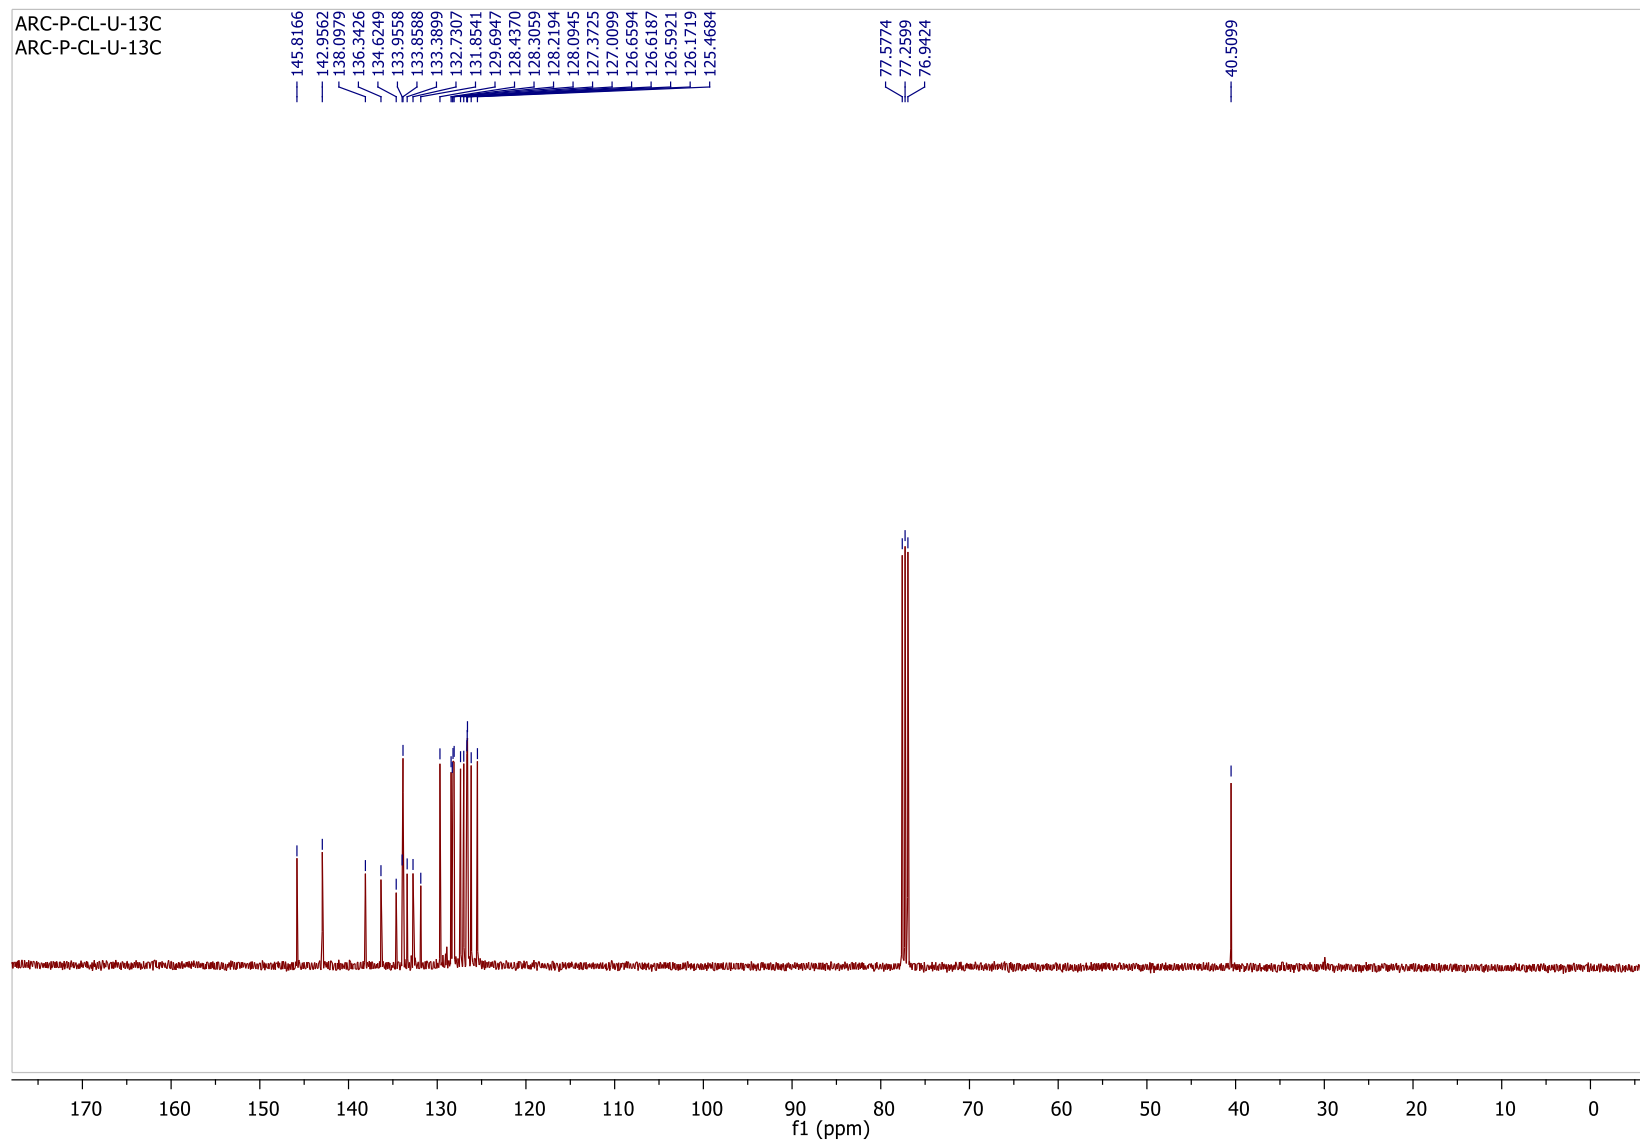

**S50**

# <sup>1</sup>H Spectrum of **3m**

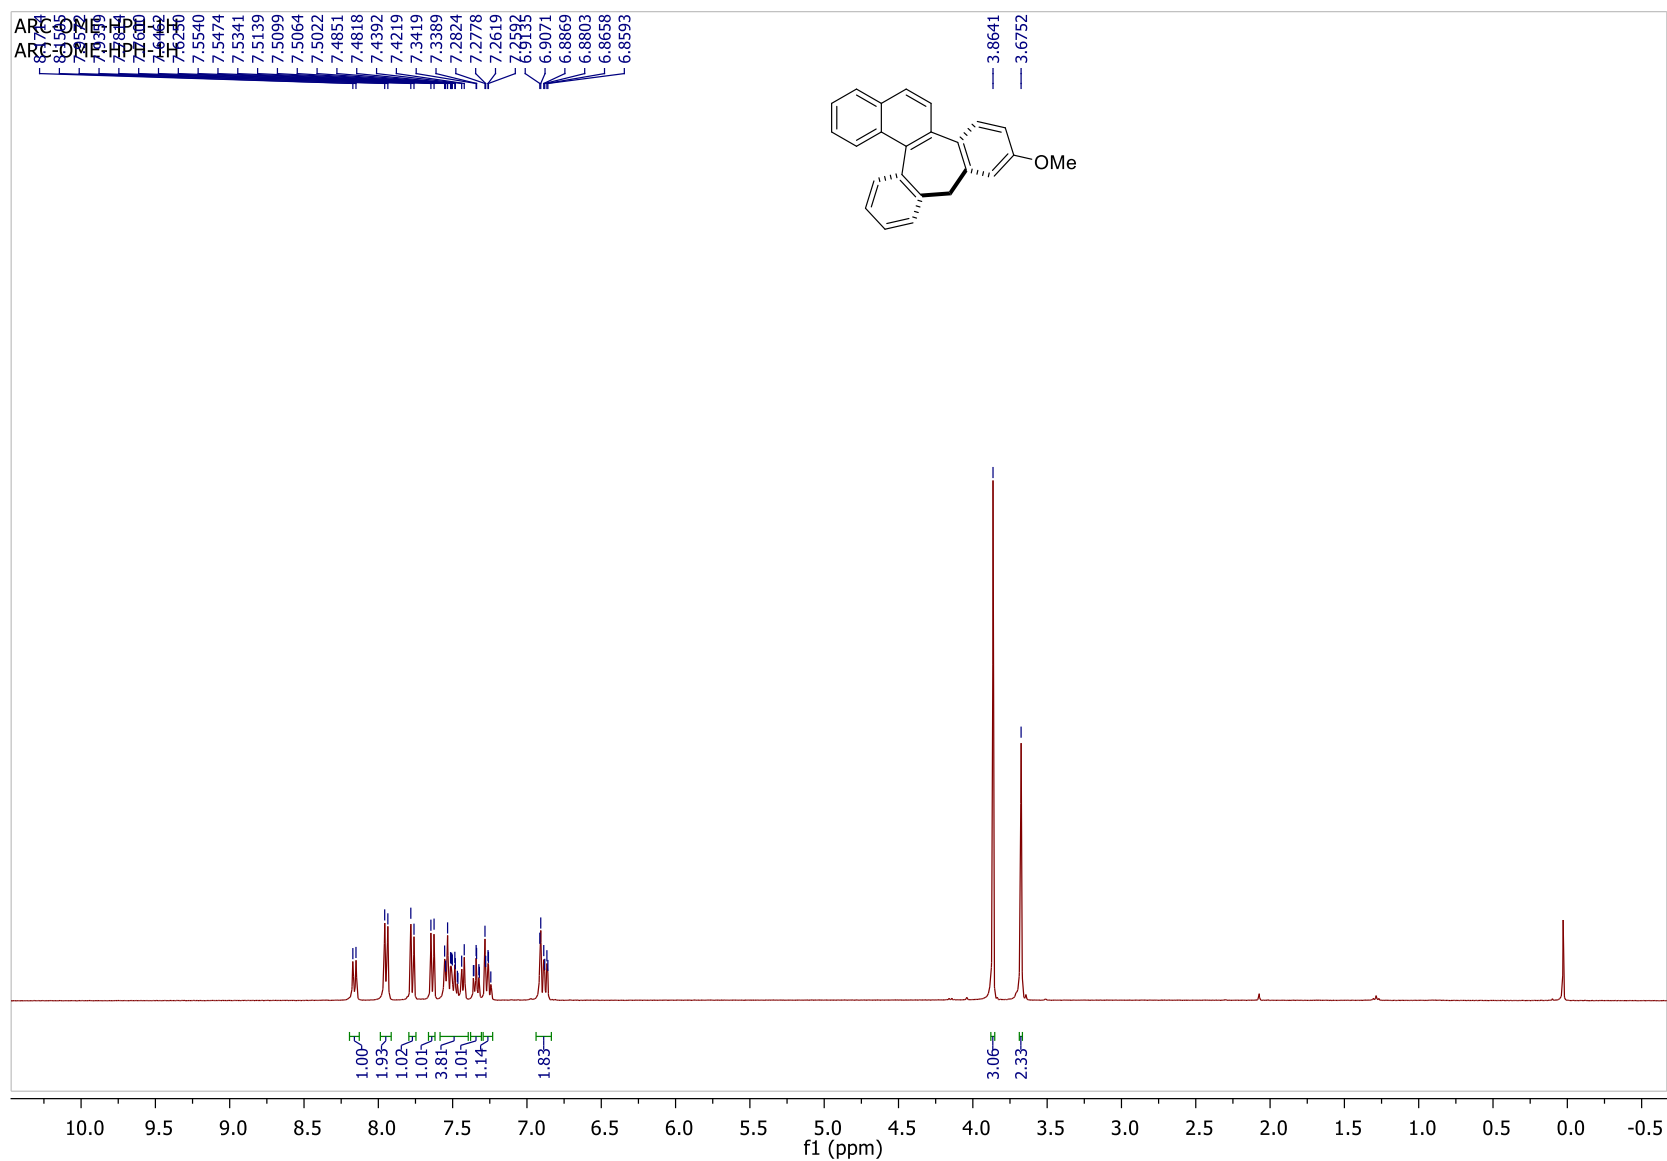

S51

# <sup>13</sup>C Spectrum of **3m**

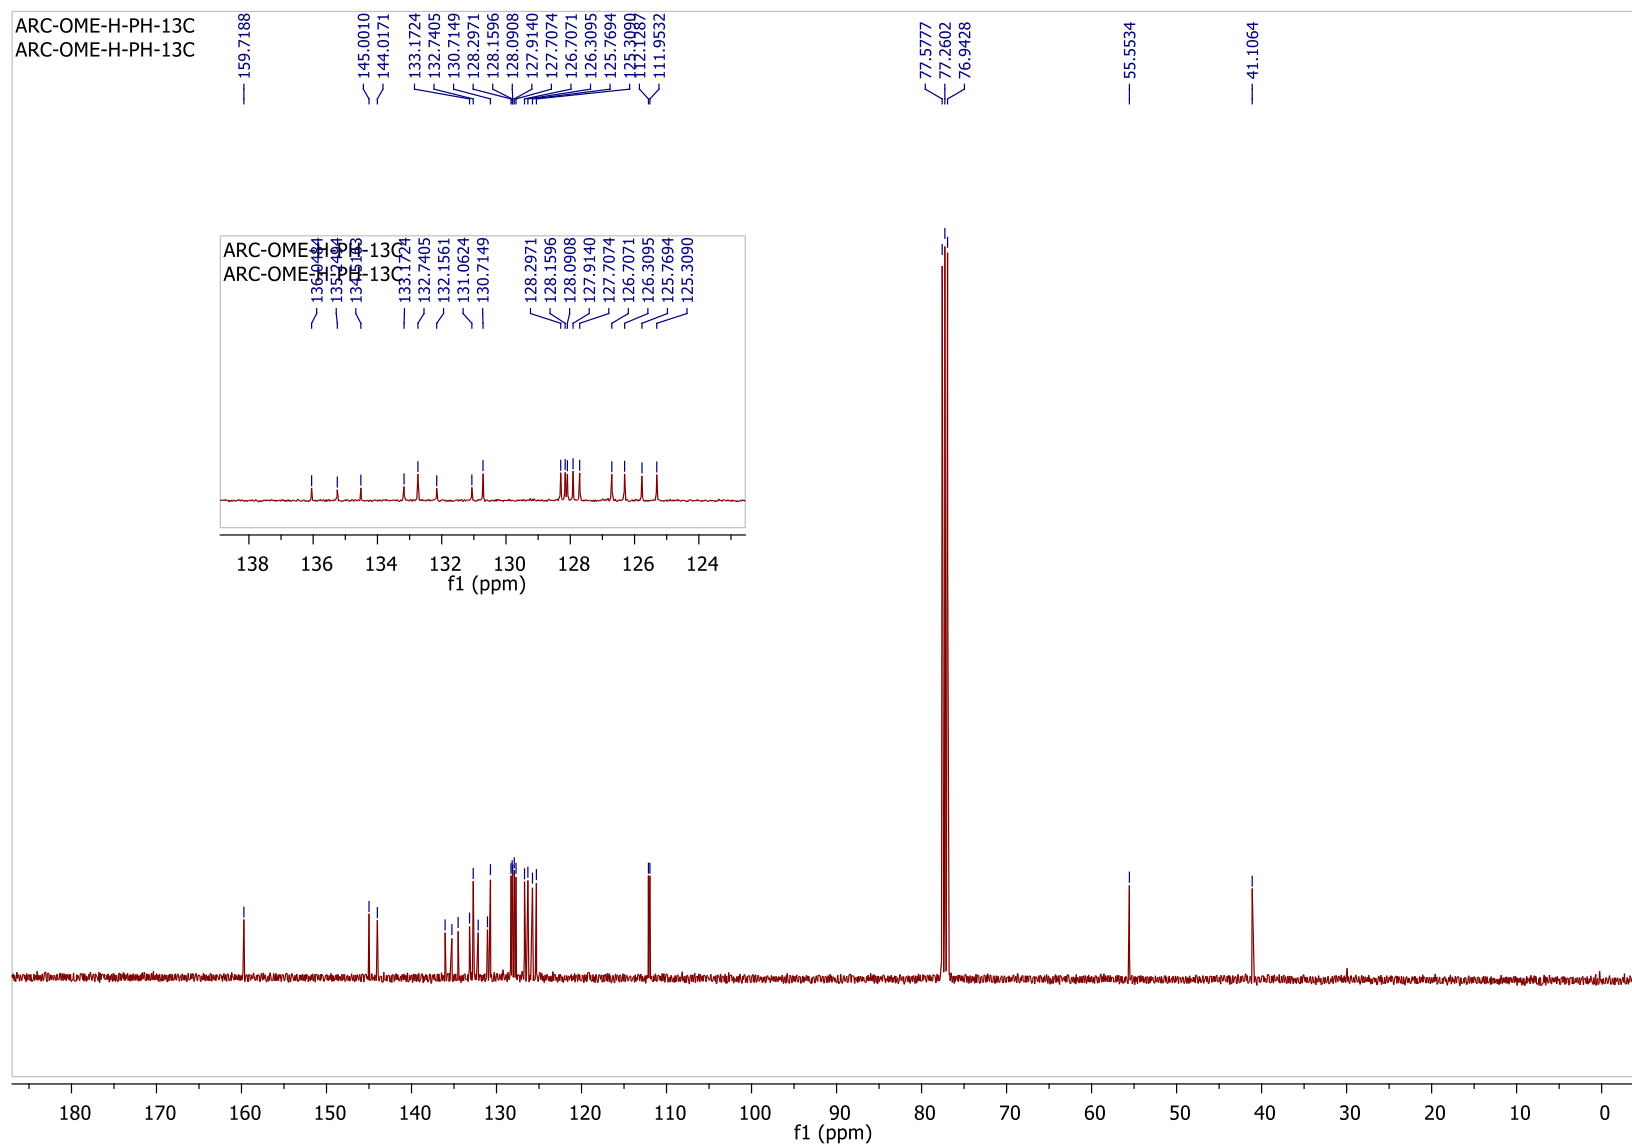

# <sup>1</sup>H Spectrum of **3n**

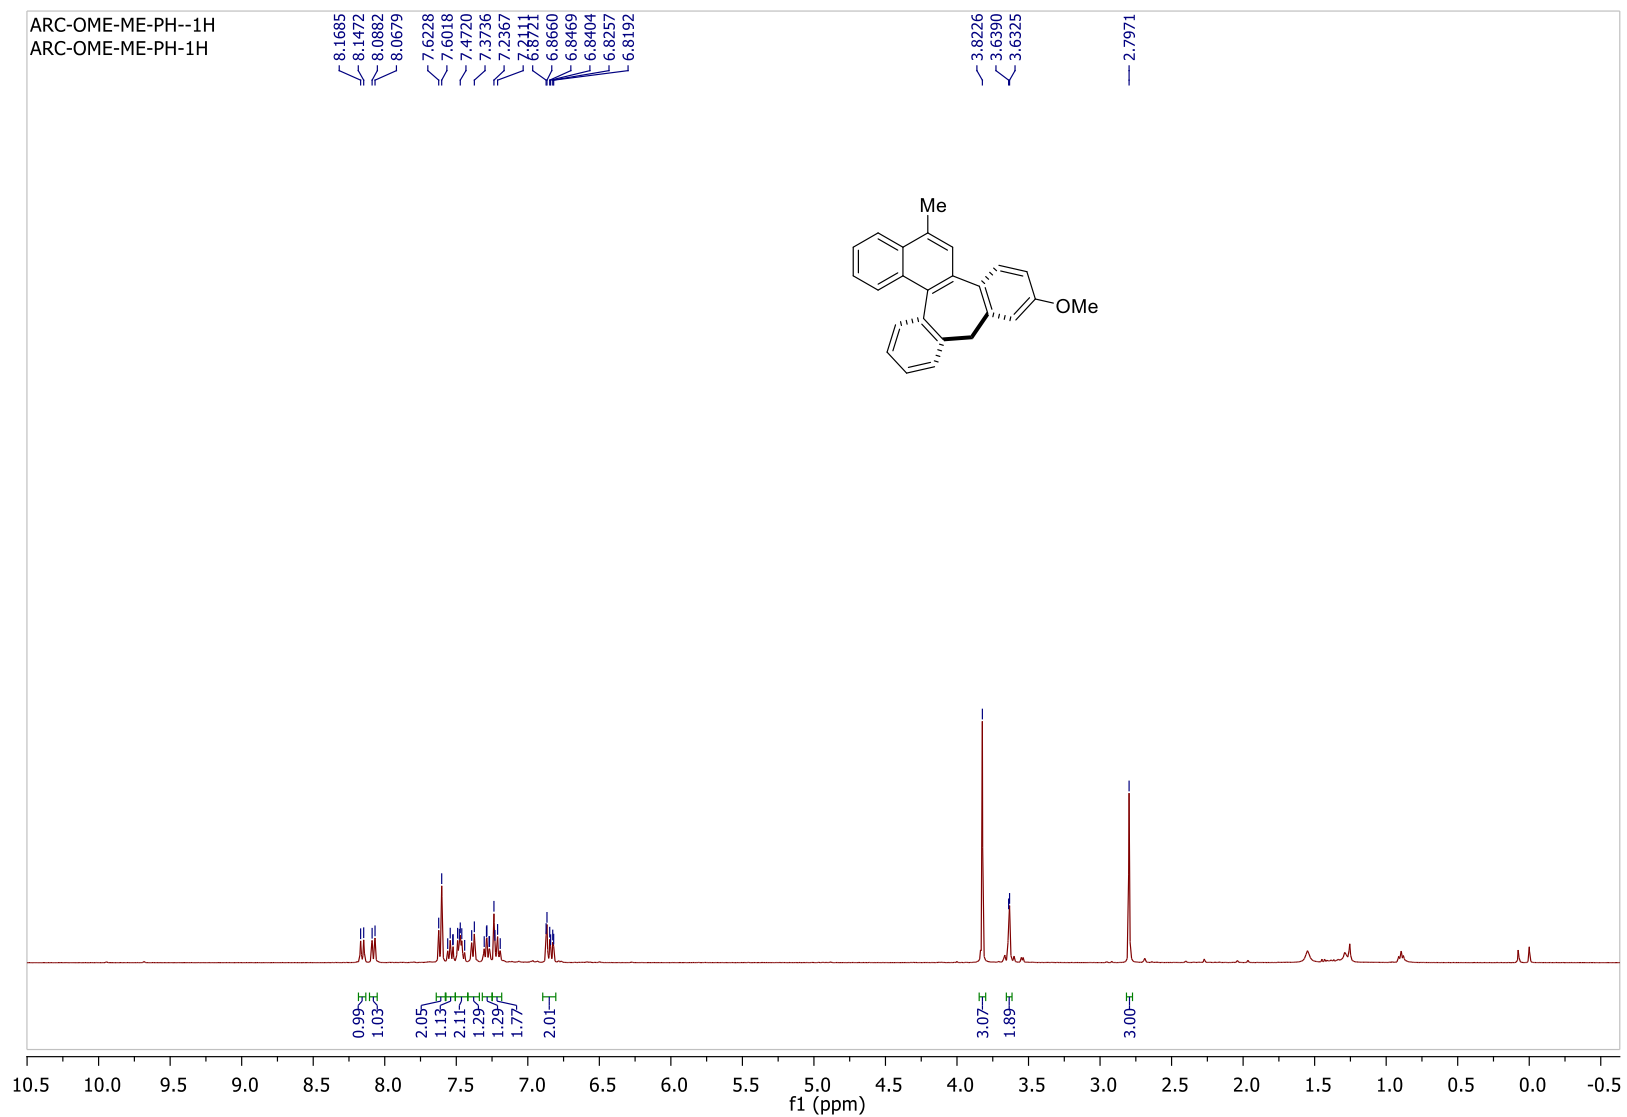

# <sup>13</sup>C Spectrum of 3n

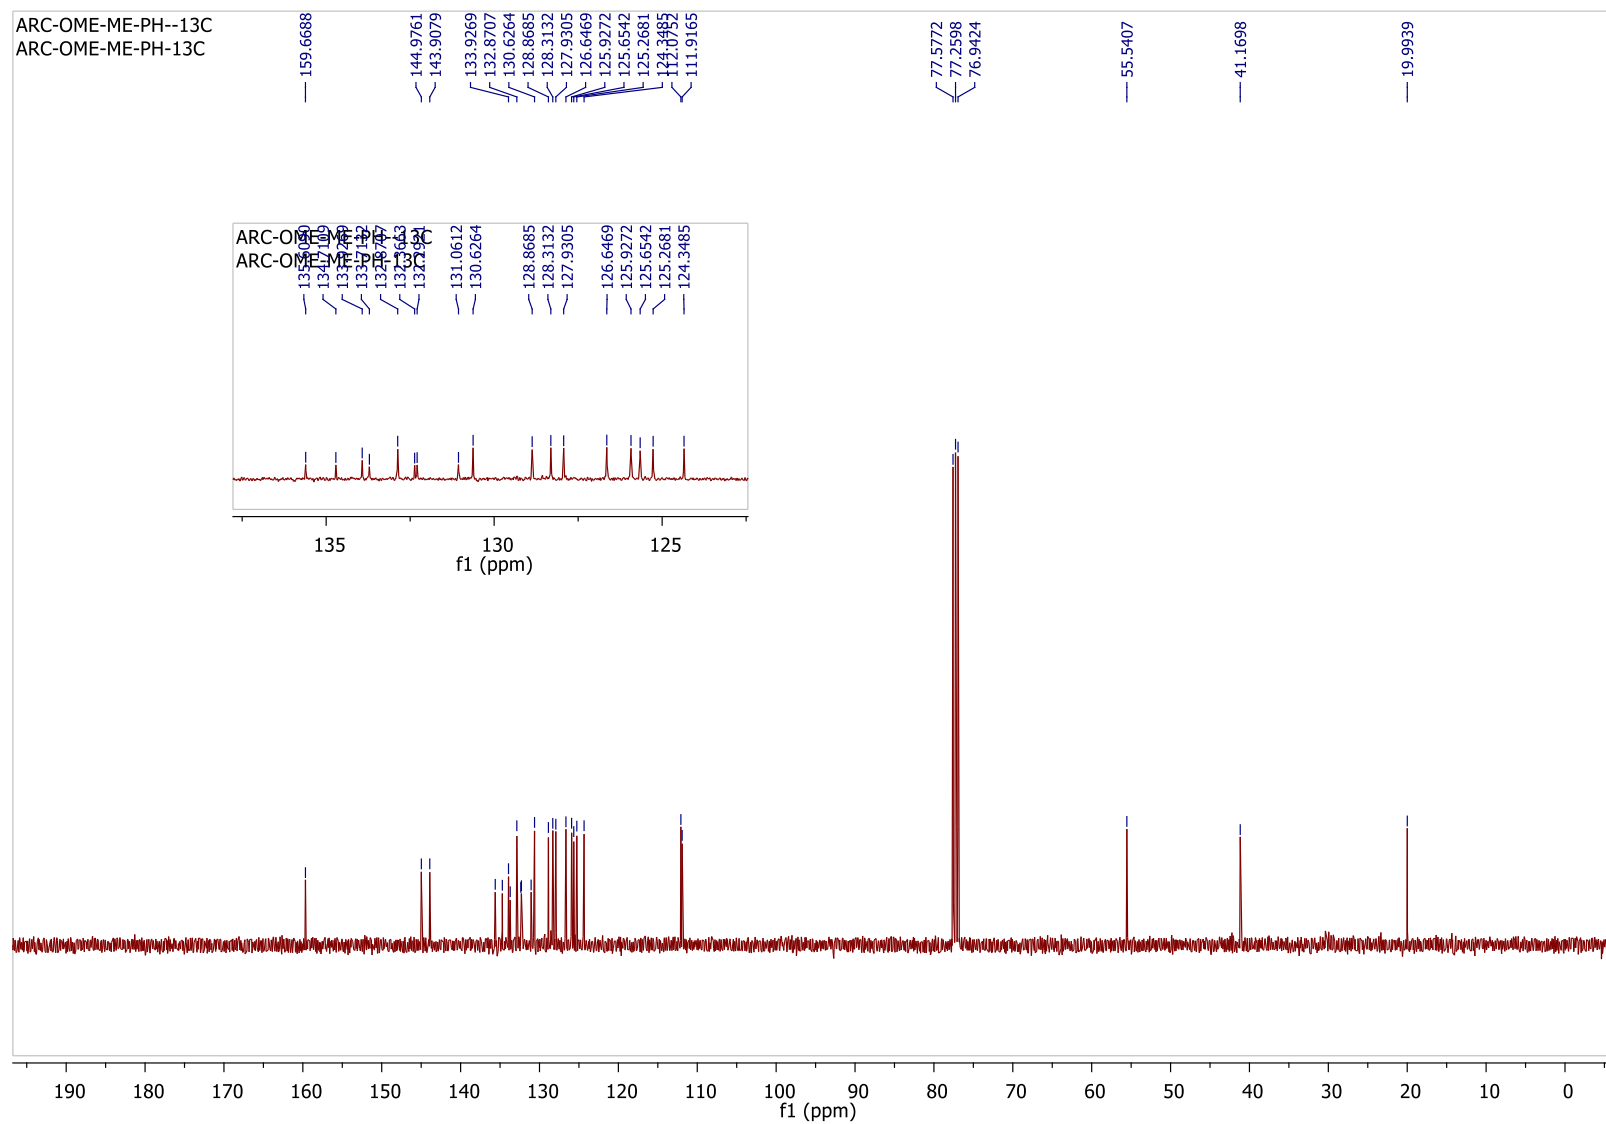

# <sup>1</sup>H Spectrum of **3o**

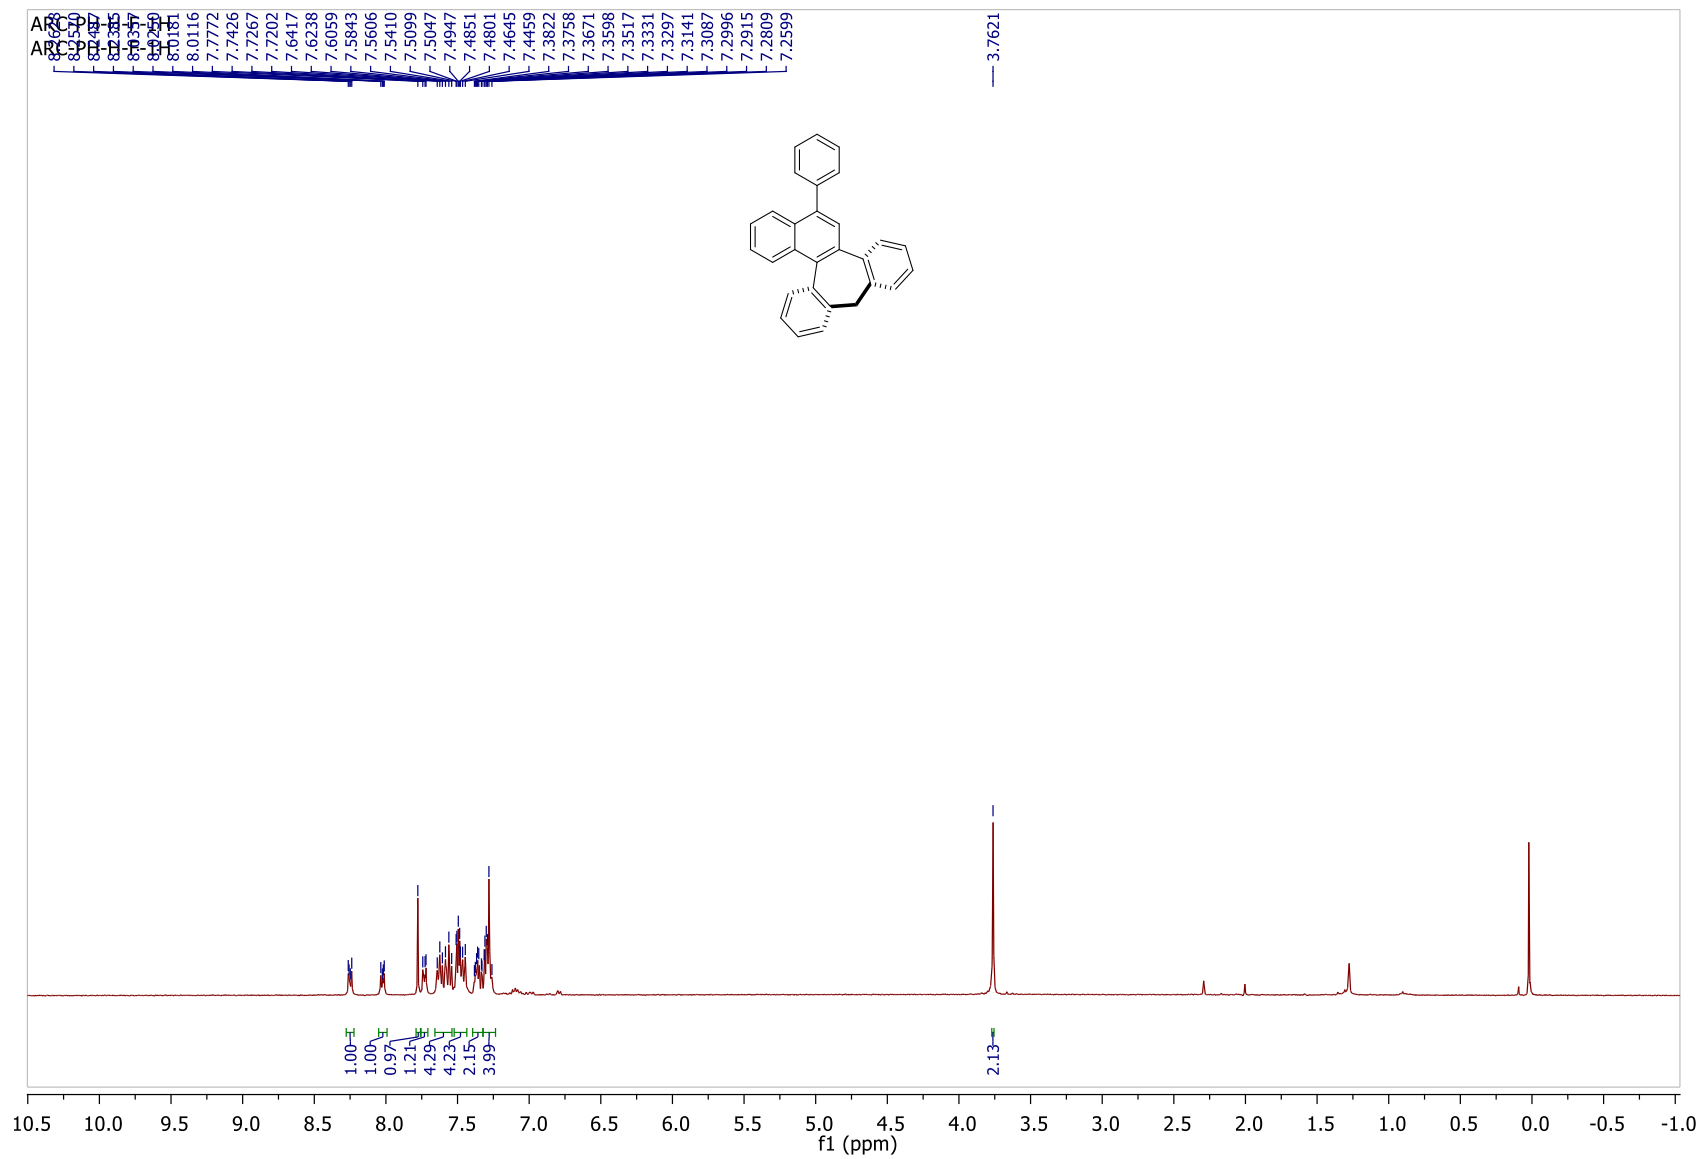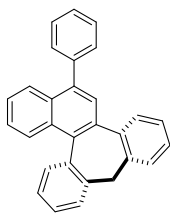

# <sup>13</sup>C Spectrum of **3o**

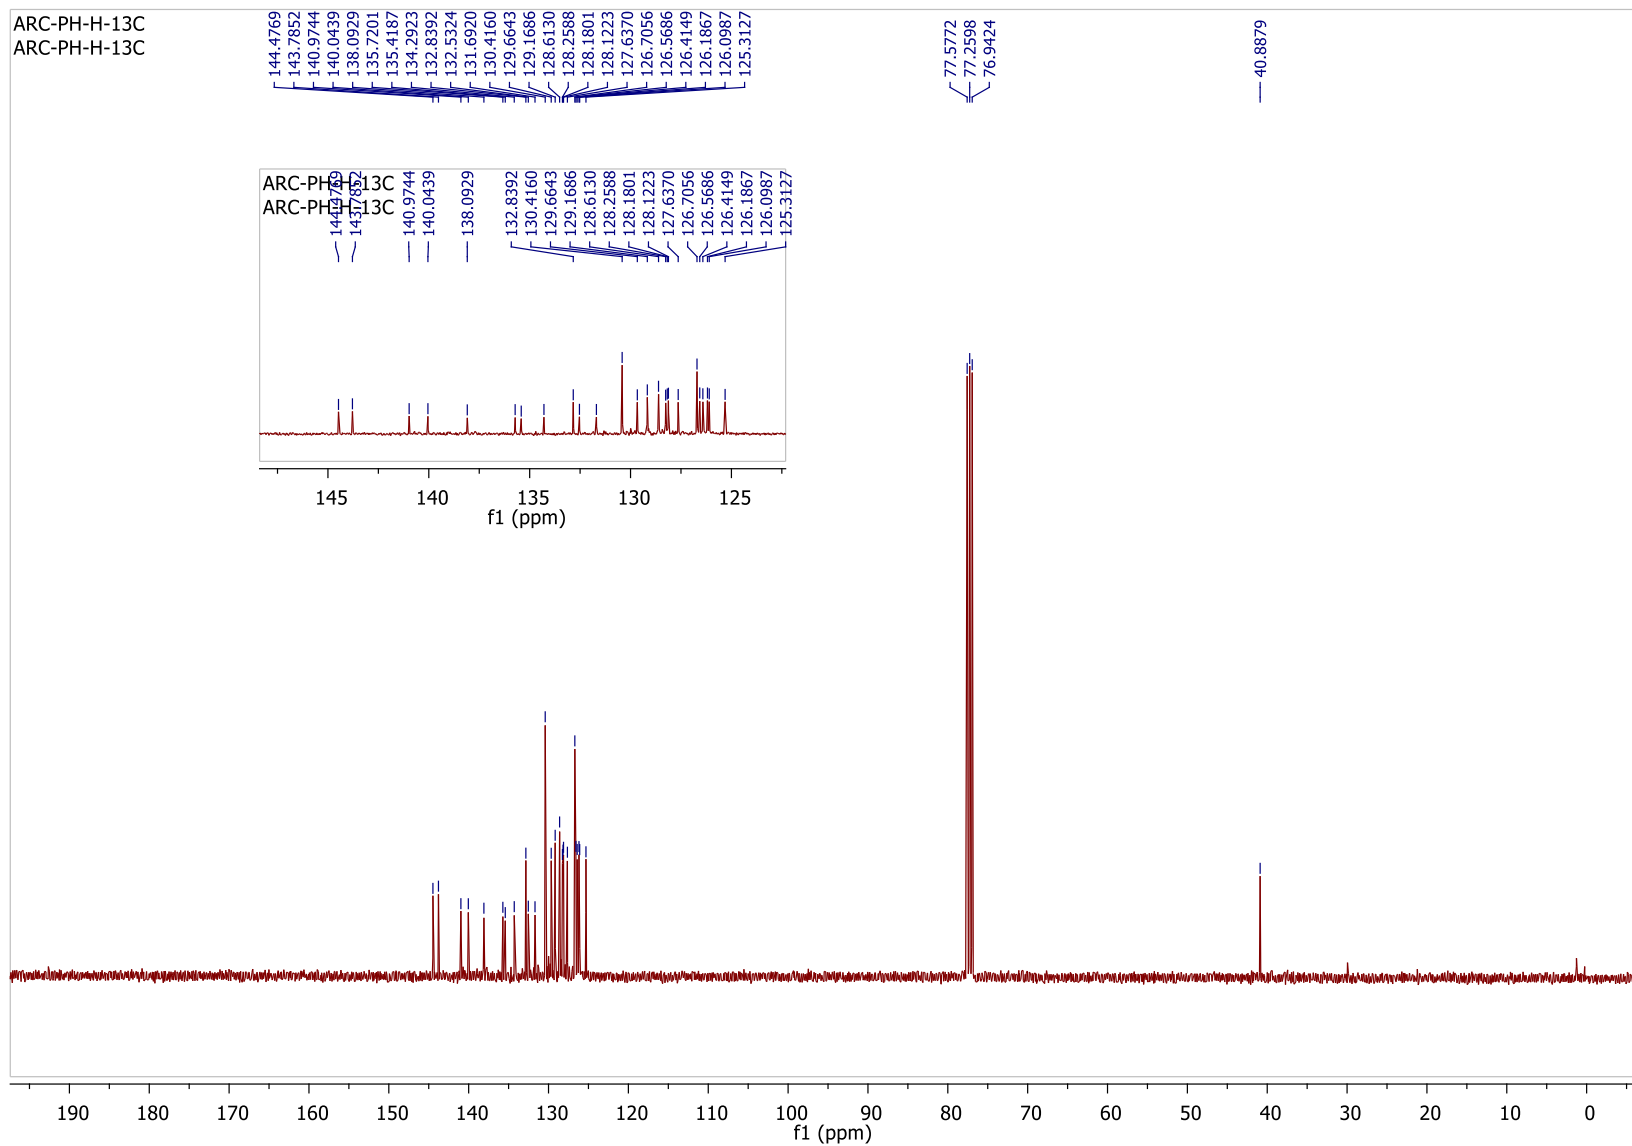



# <sup>1</sup>H Spectrum of 3p

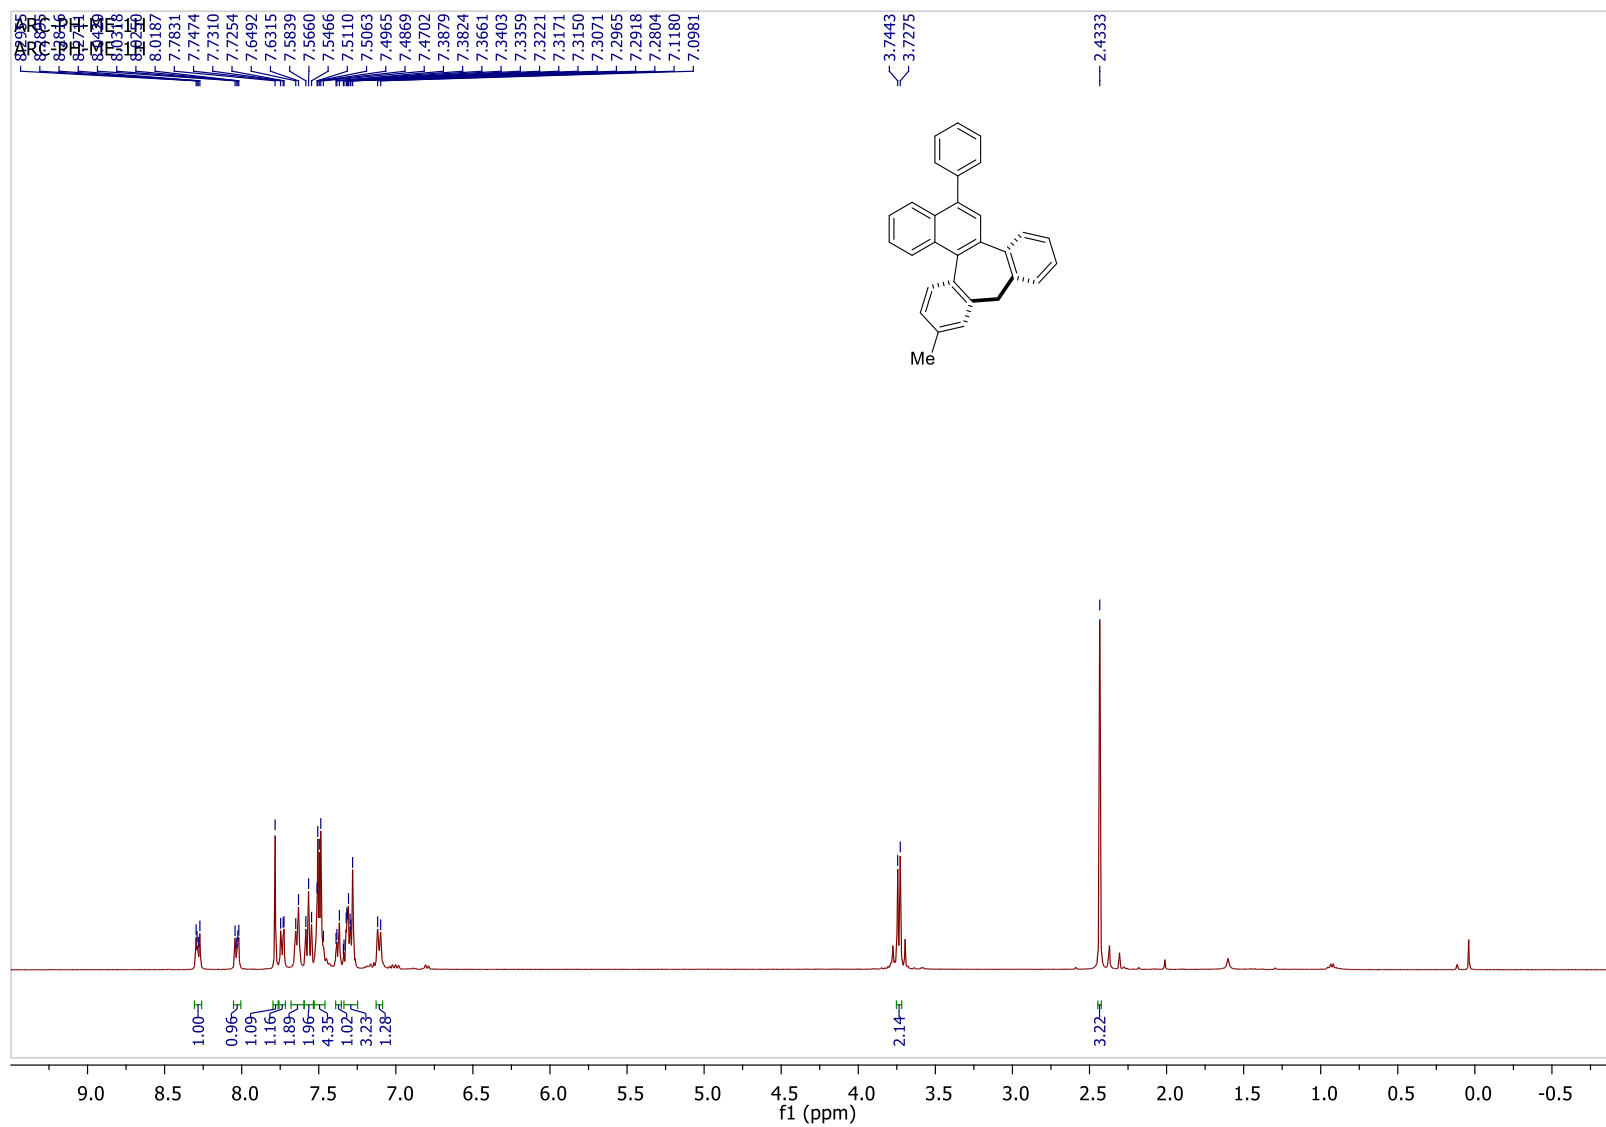

# <sup>13</sup>C Spectrum of 3p

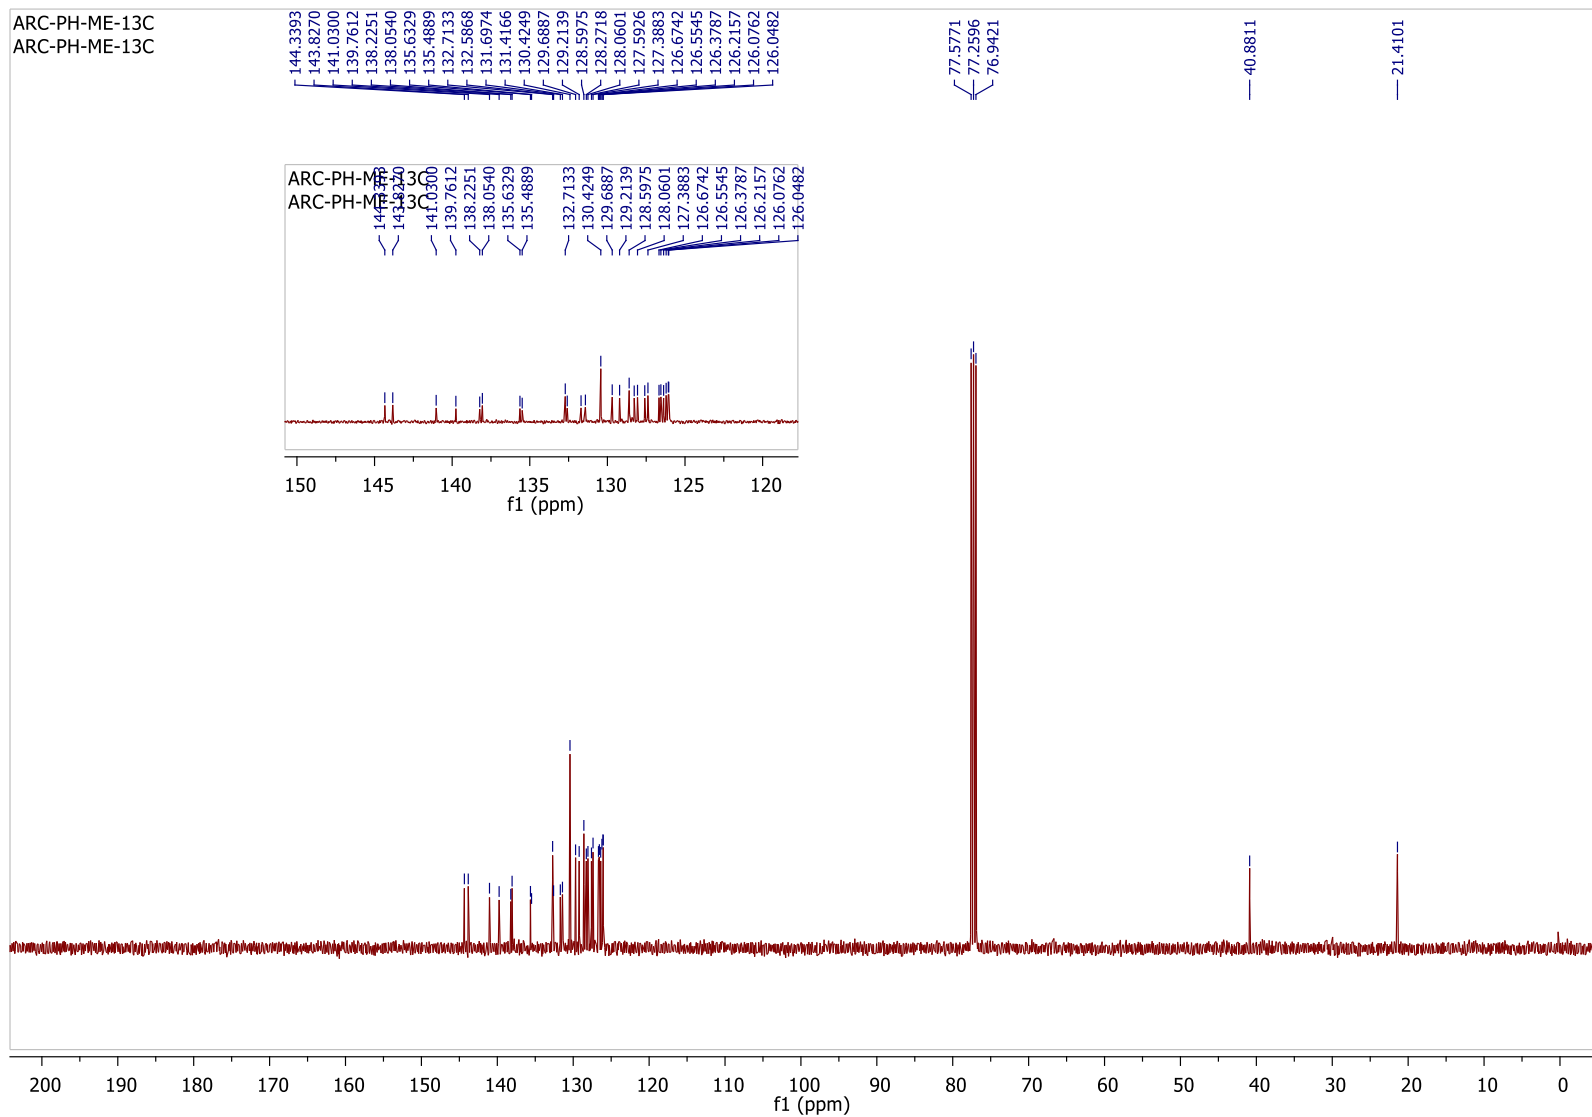

# <sup>1</sup>H Spectrum of 3q

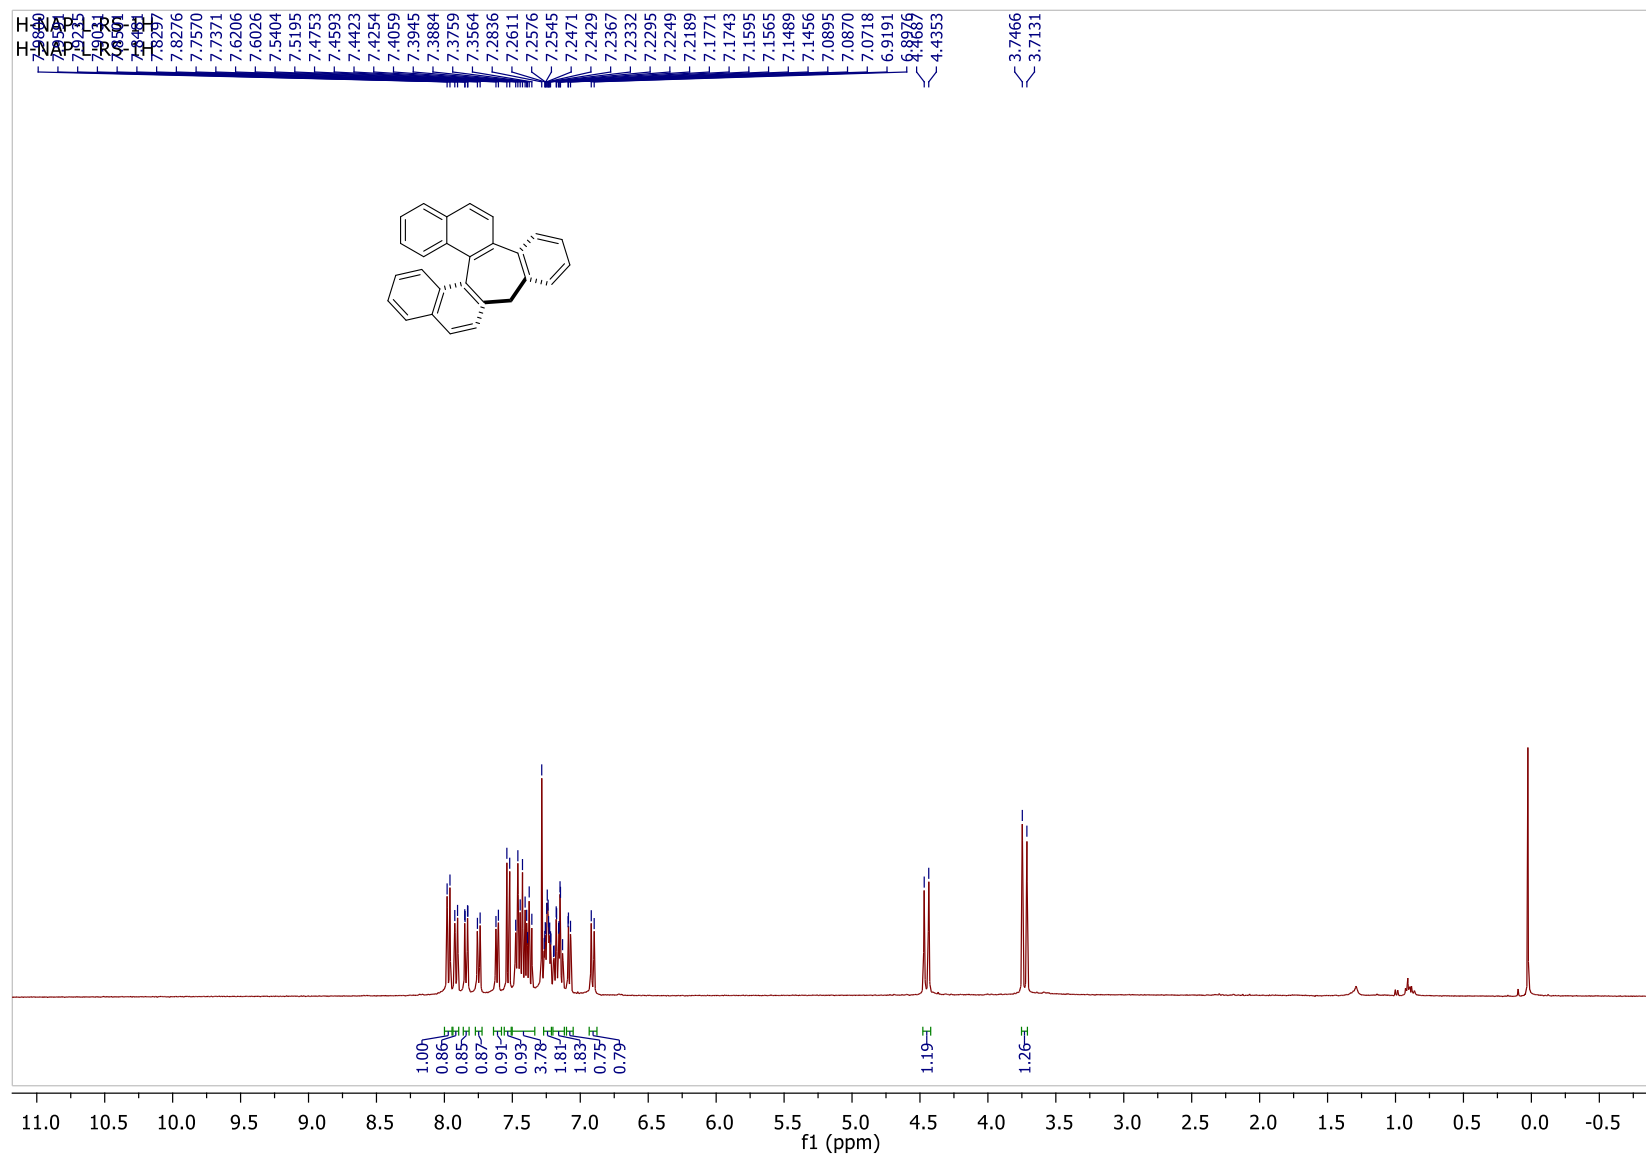

S59

# $^{13}\text{C}$ Spectrum of 3q

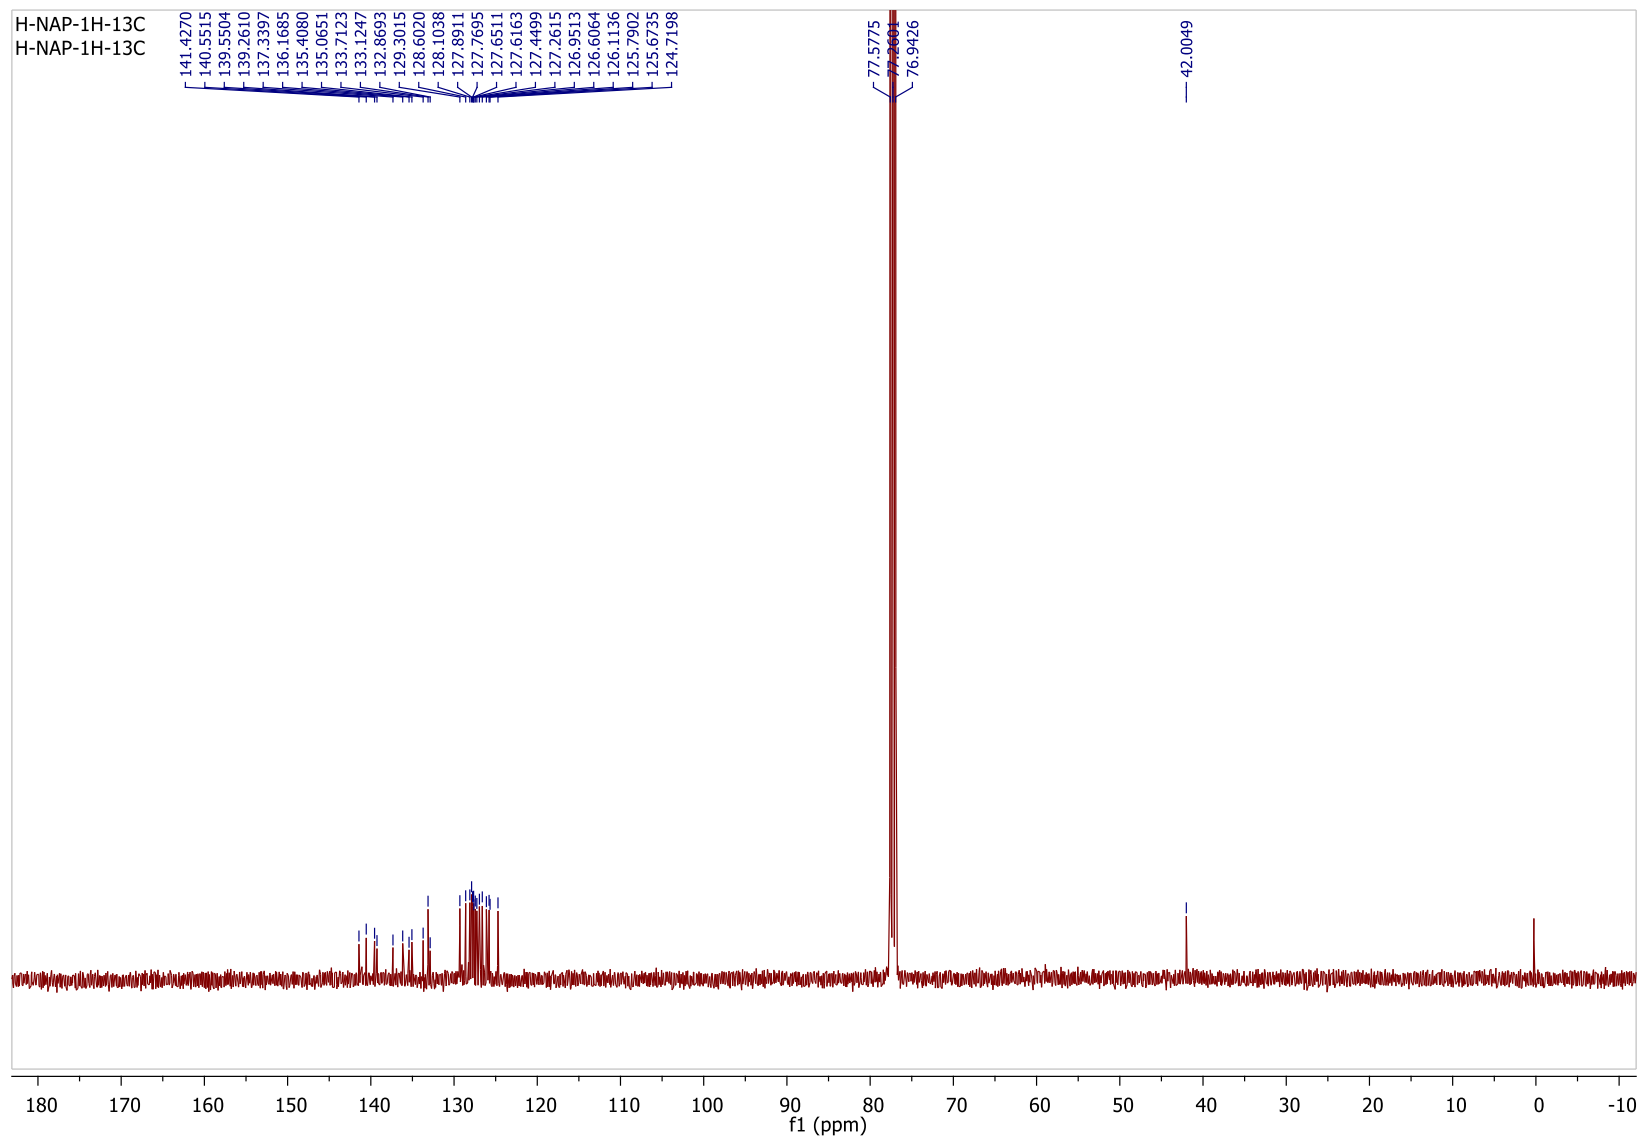

S60

# <sup>1</sup>H Spectrum of 4q

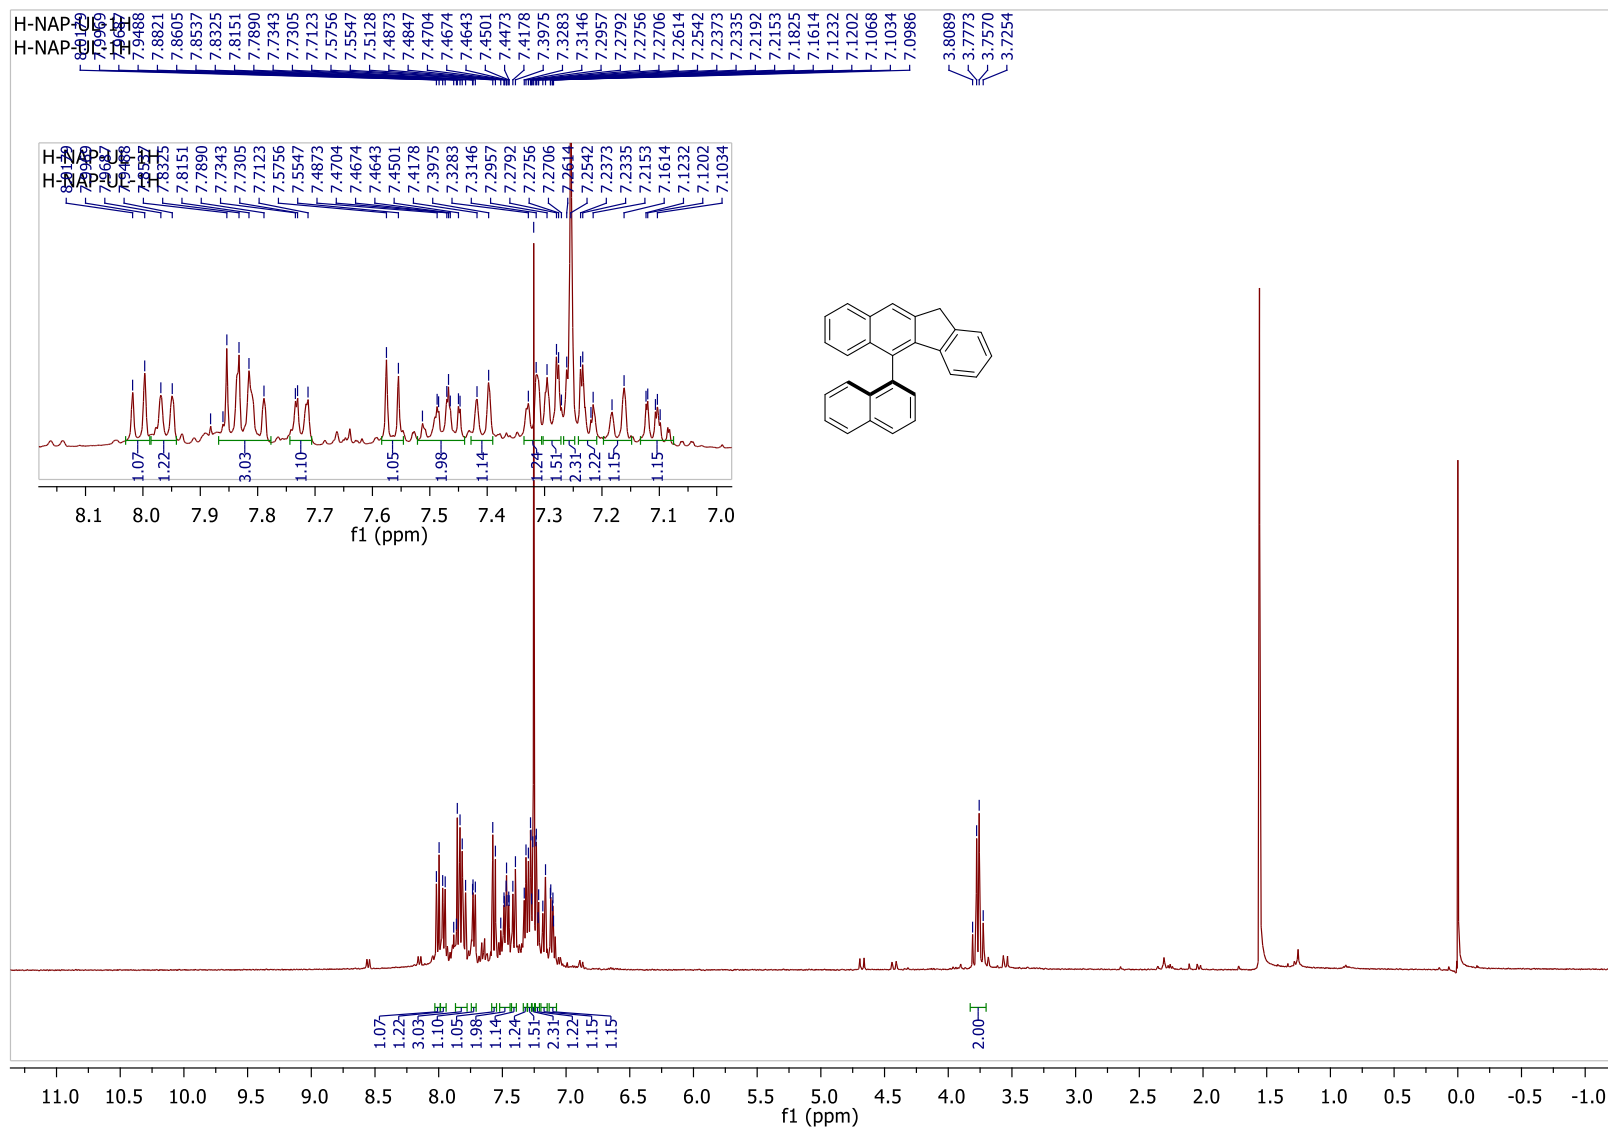

# <sup>13</sup>C Spectrum of 4q

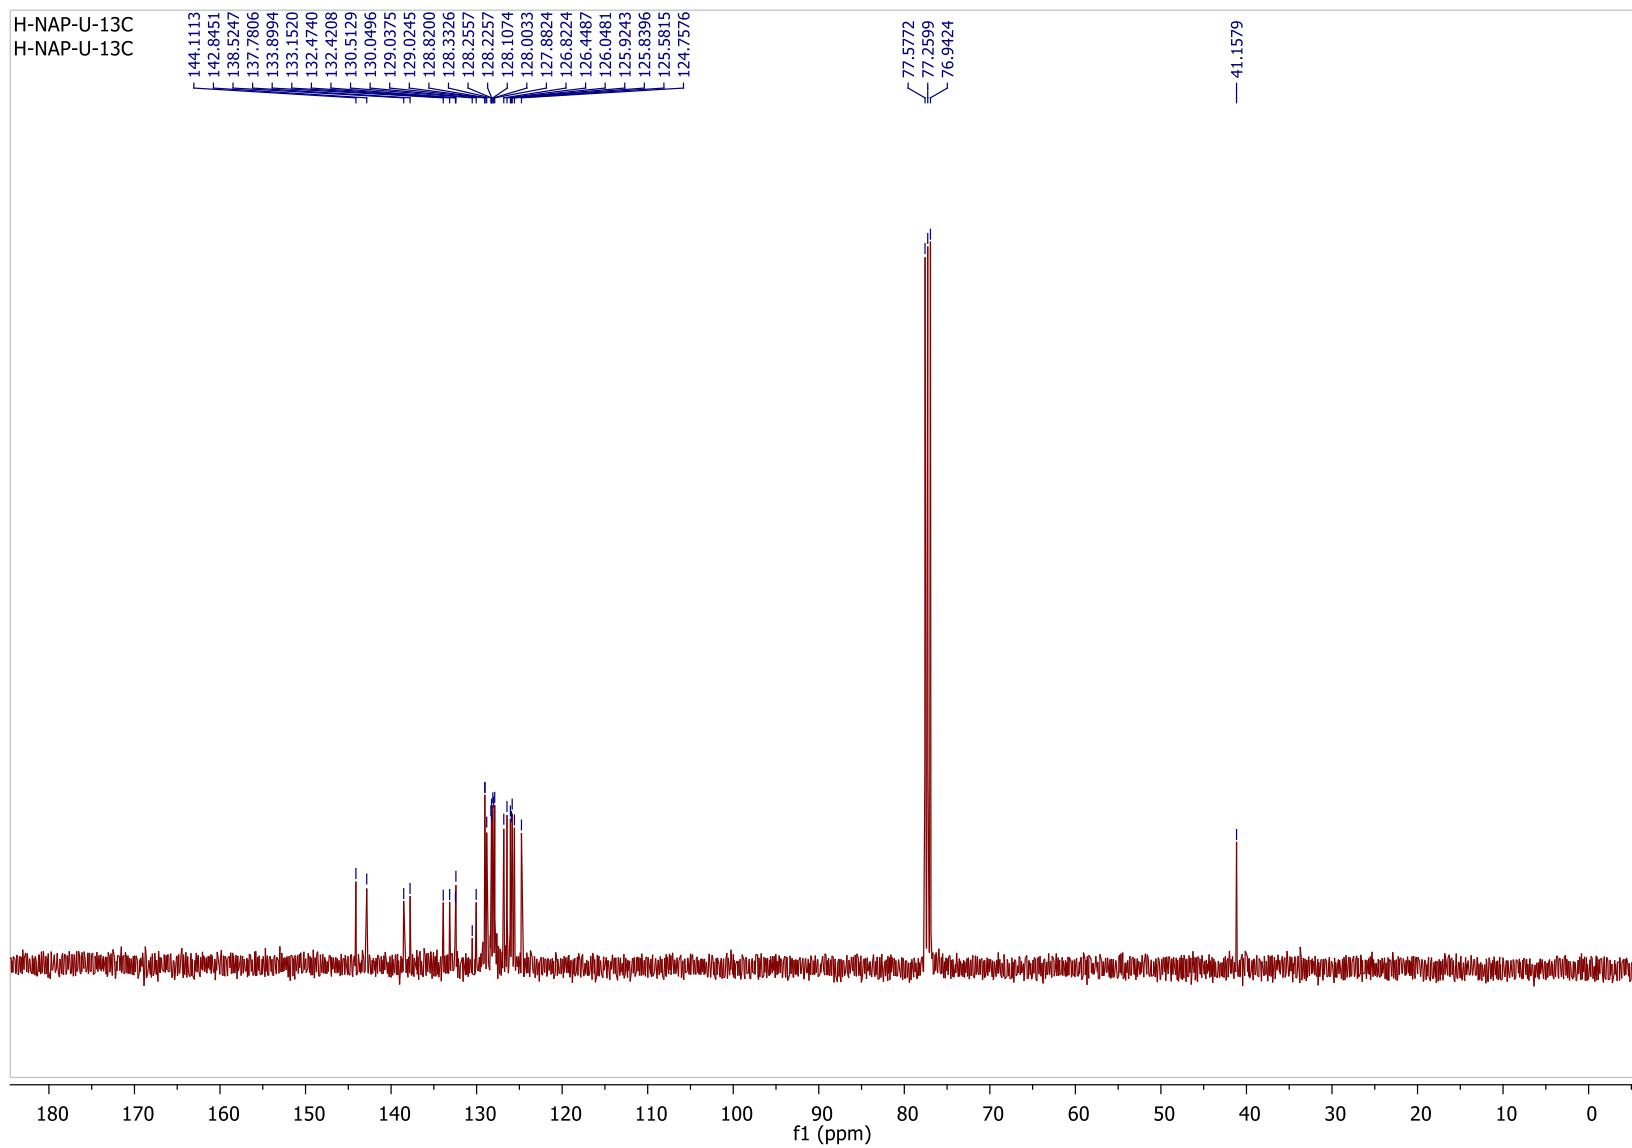

# <sup>1</sup>H Spectrum of 3r and 4r

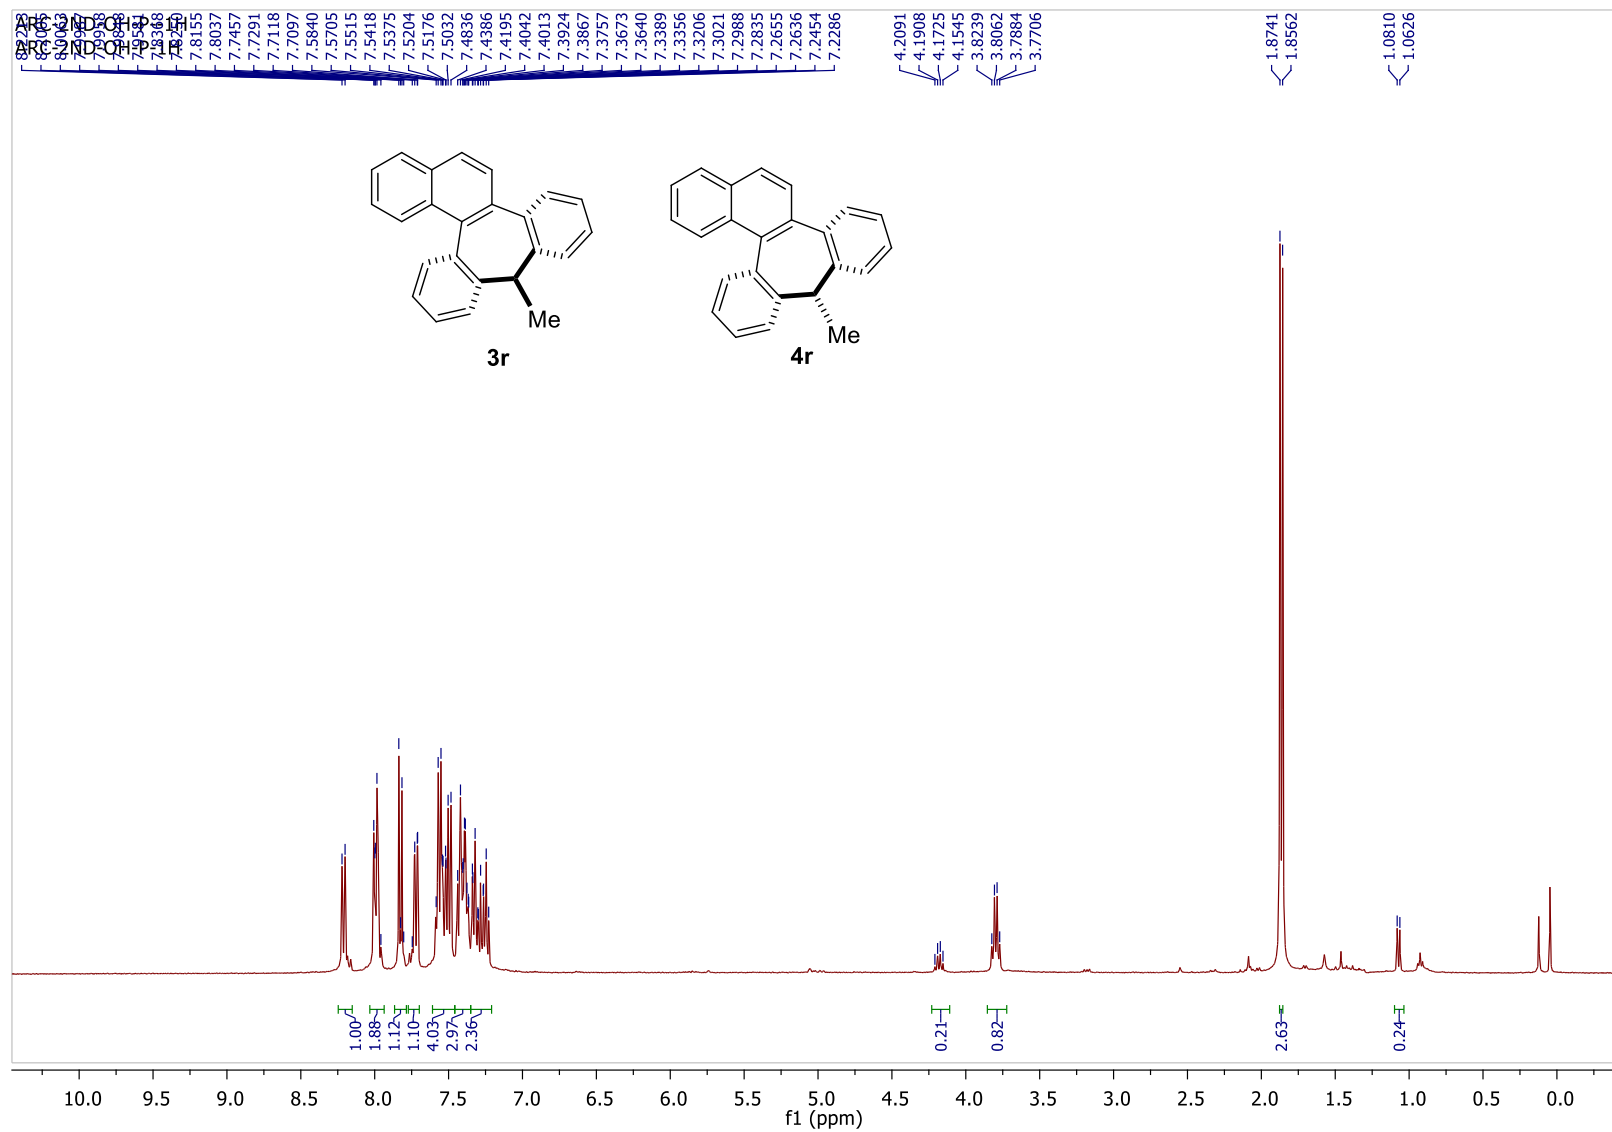

# <sup>13</sup>C Spectrum of 3r and 4r

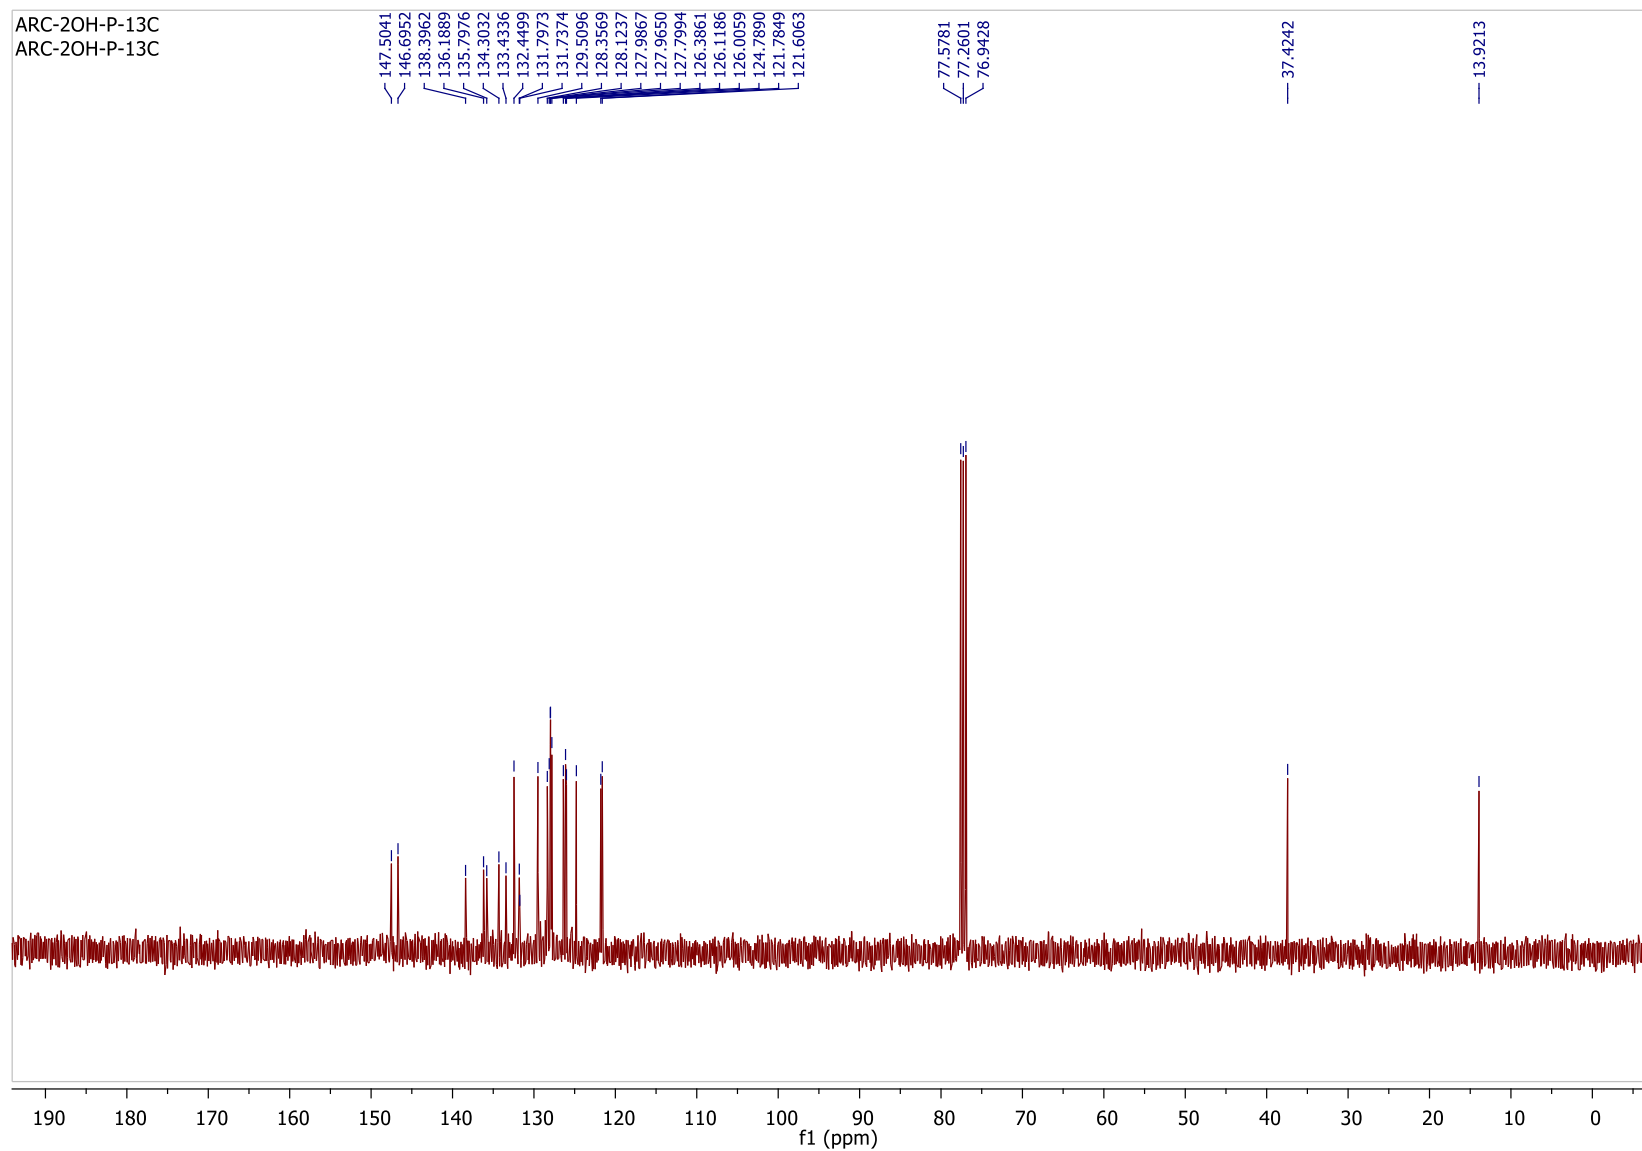



# <sup>1</sup>H Spectrum of 3s and 4s

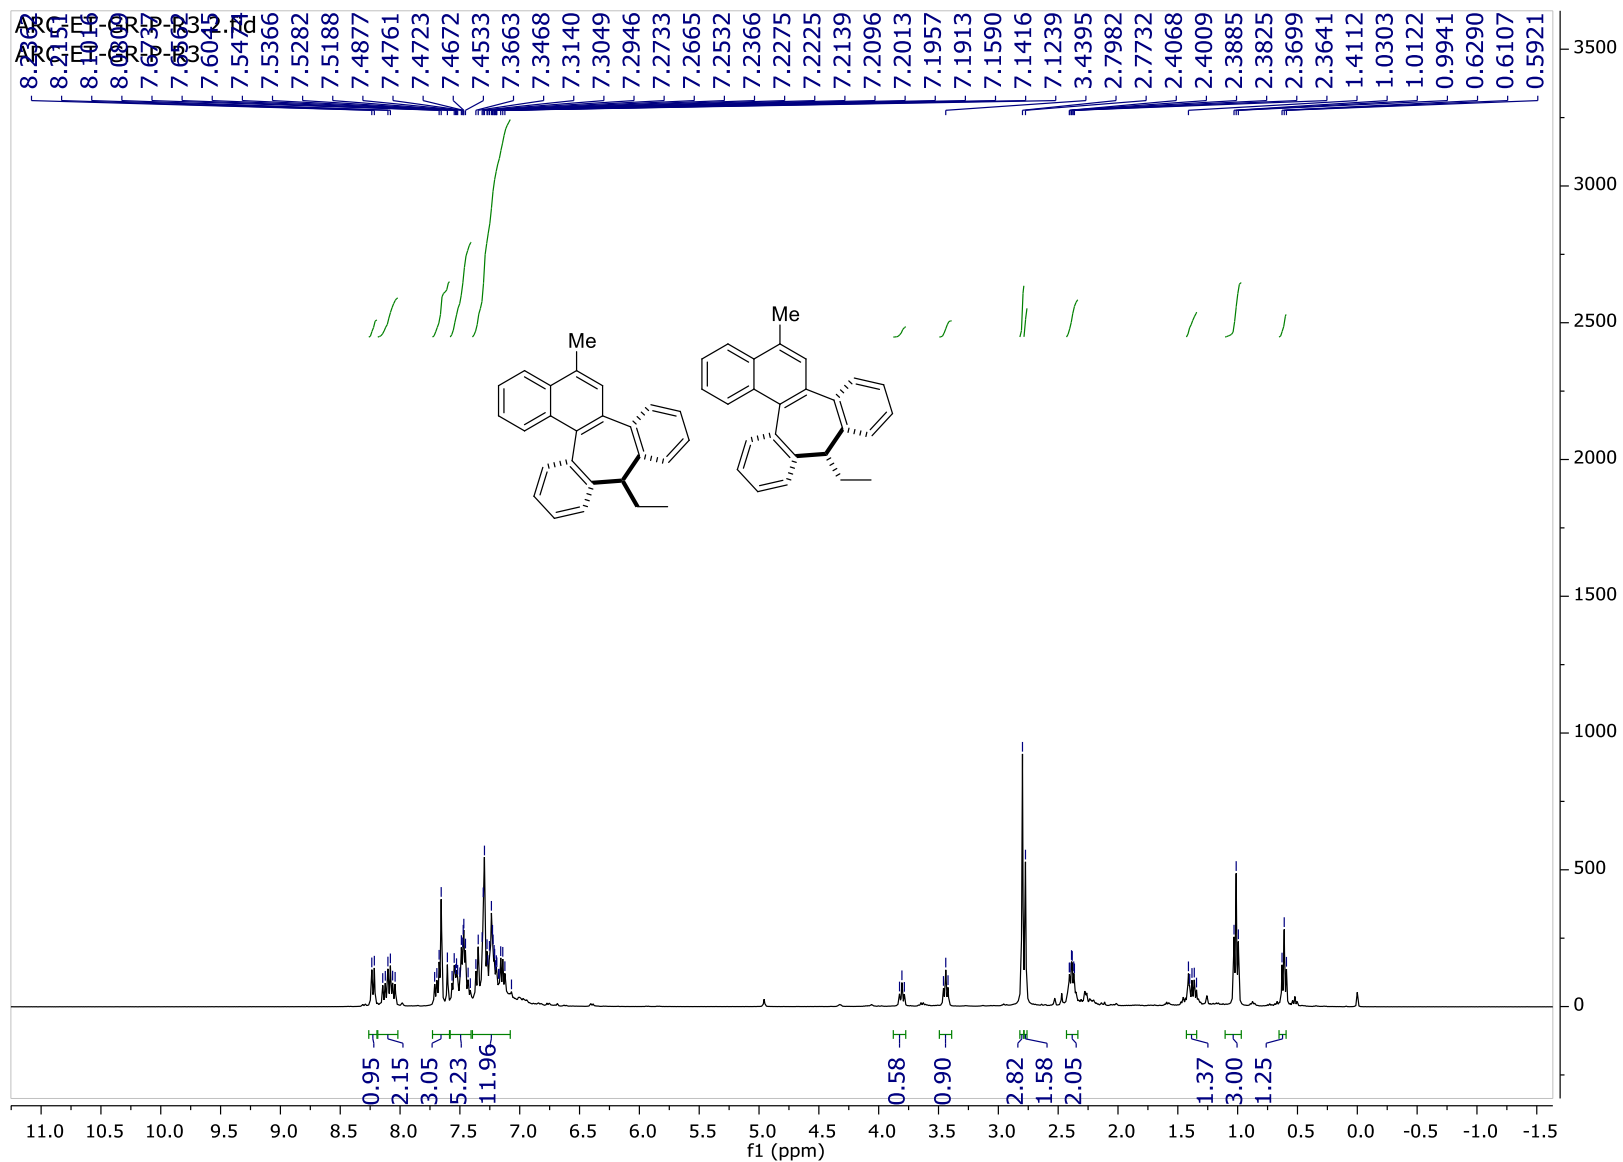

# <sup>13</sup>C Spectrum of 3s and 4s

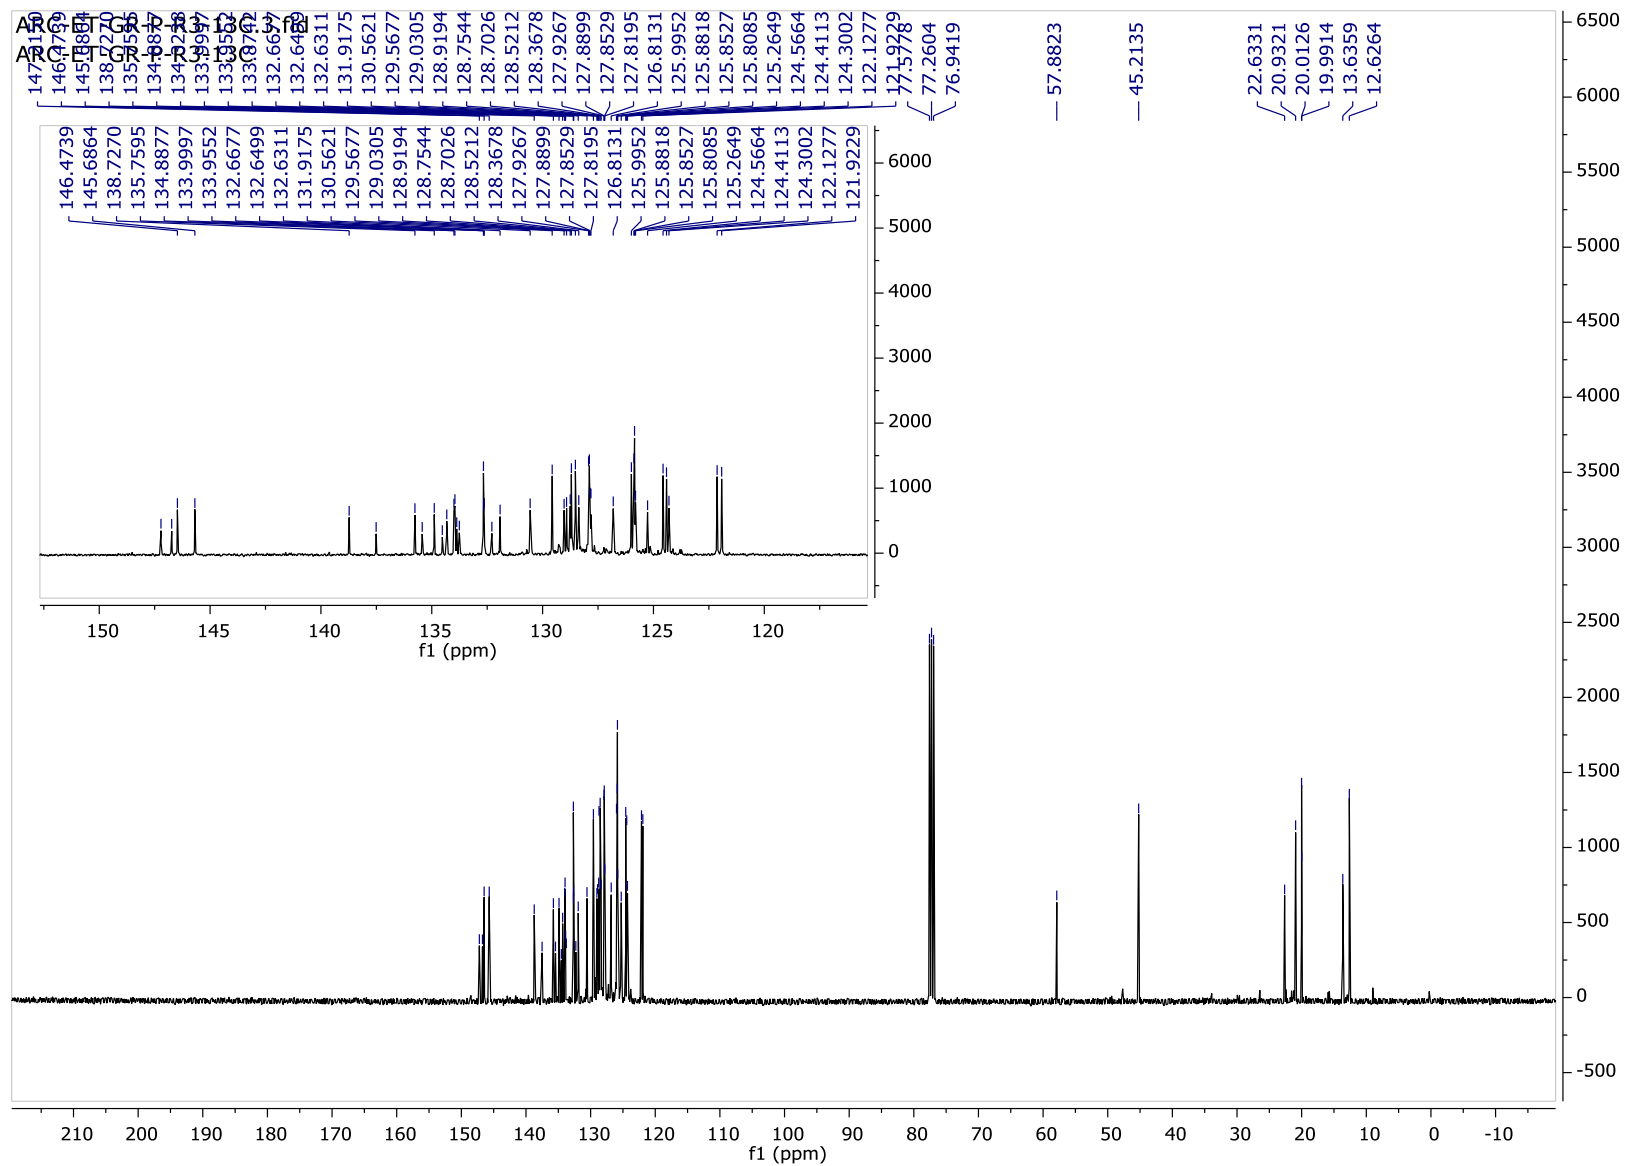

# <sup>1</sup>H Spectrum of 3t

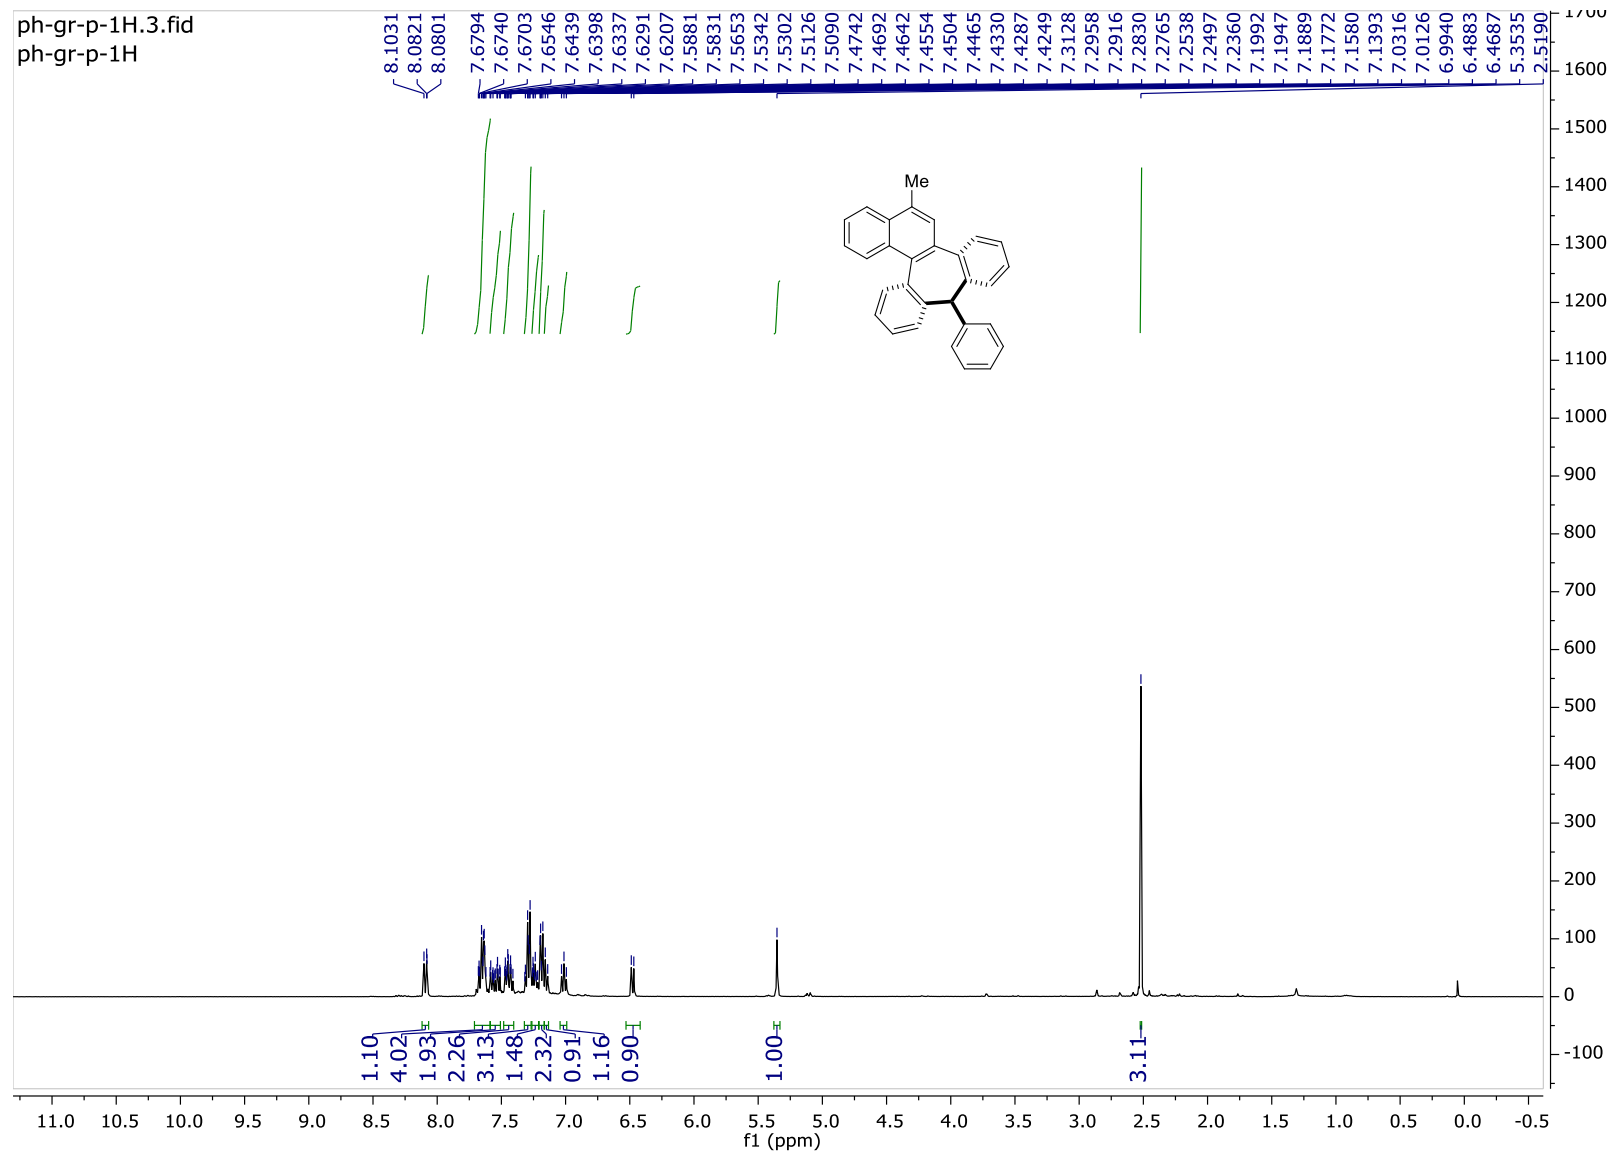

<sup>13</sup>C Spectrum of 3t

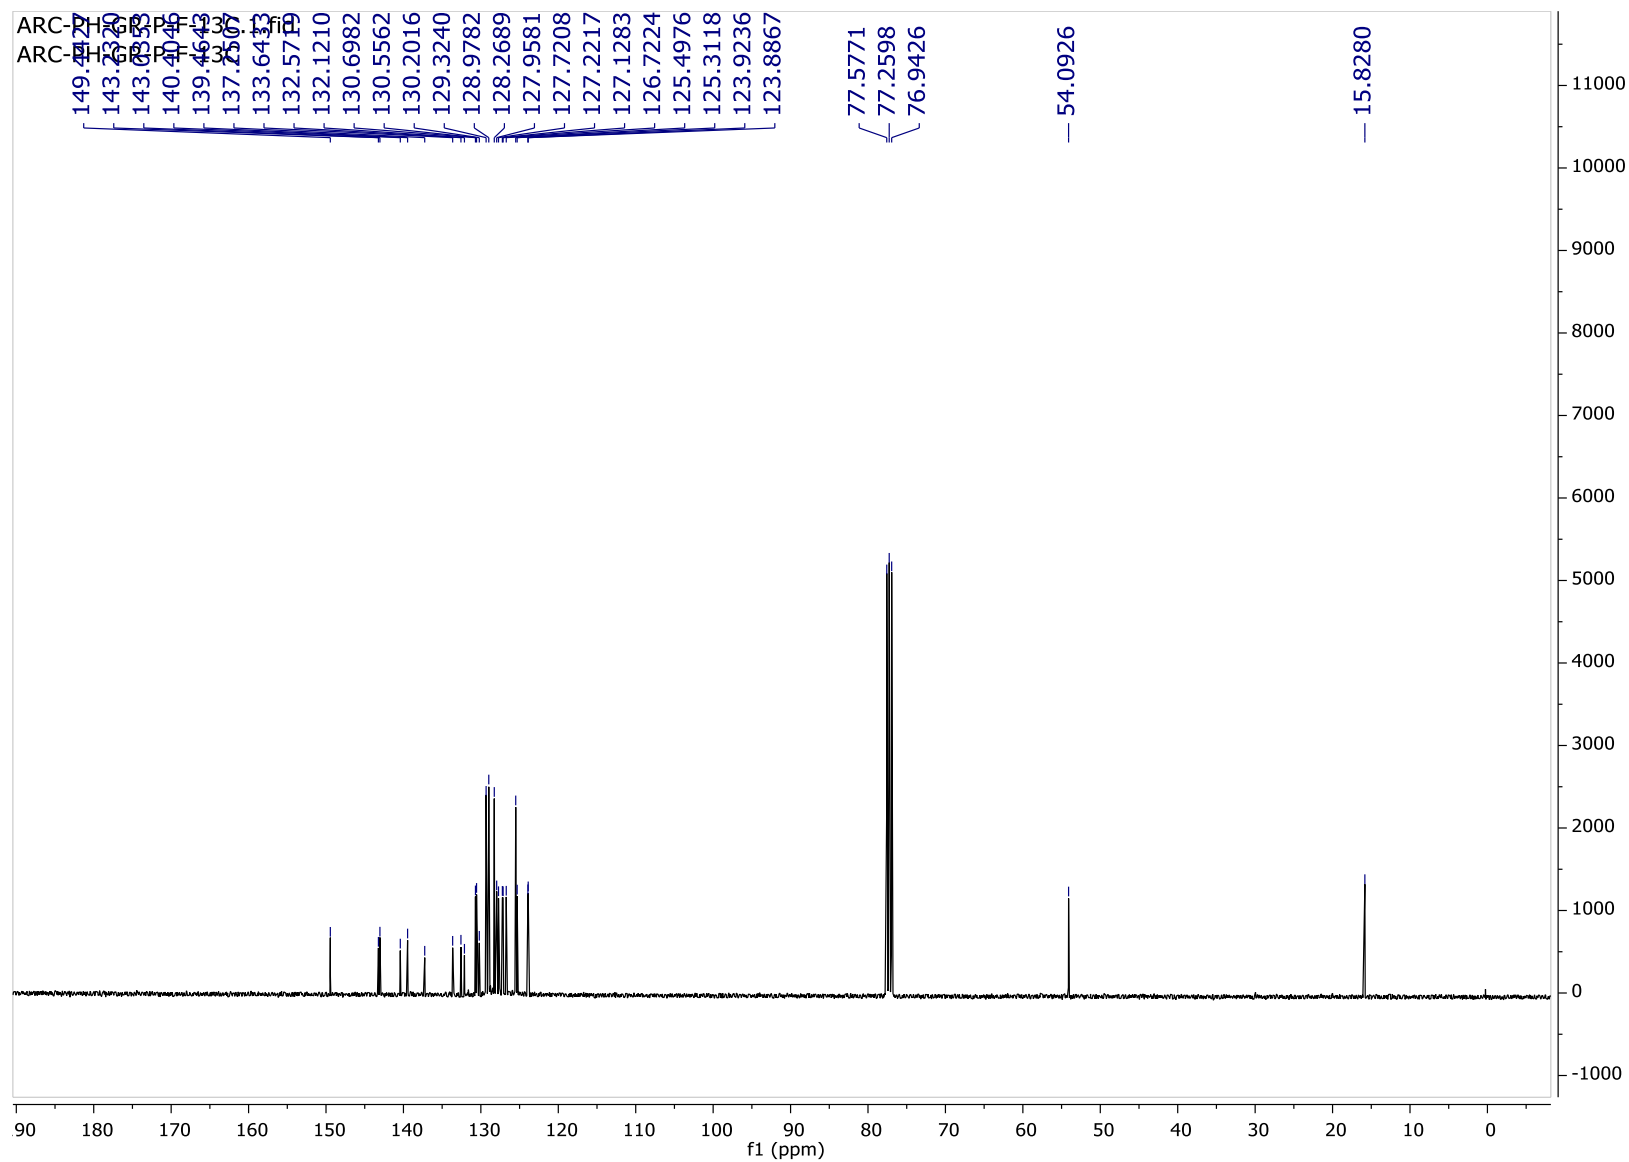

# <sup>1</sup>H Spectrum of **3u** and **4u**

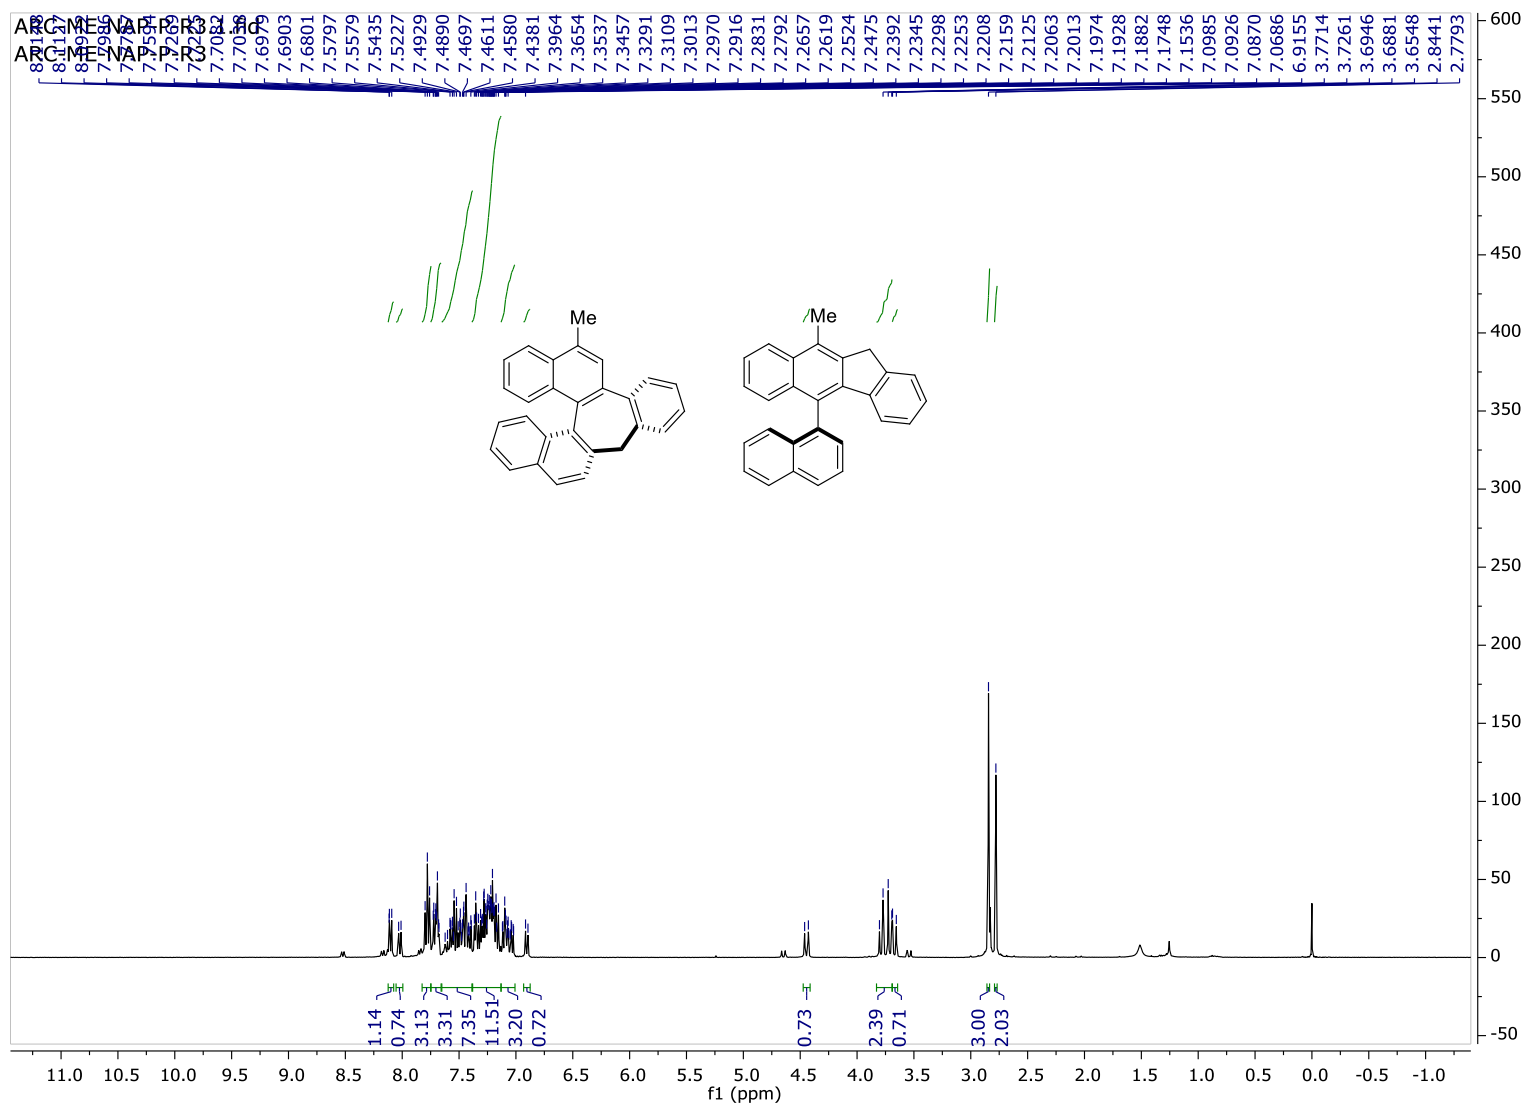

# <sup>13</sup>C Spectrum of 3u and 4u

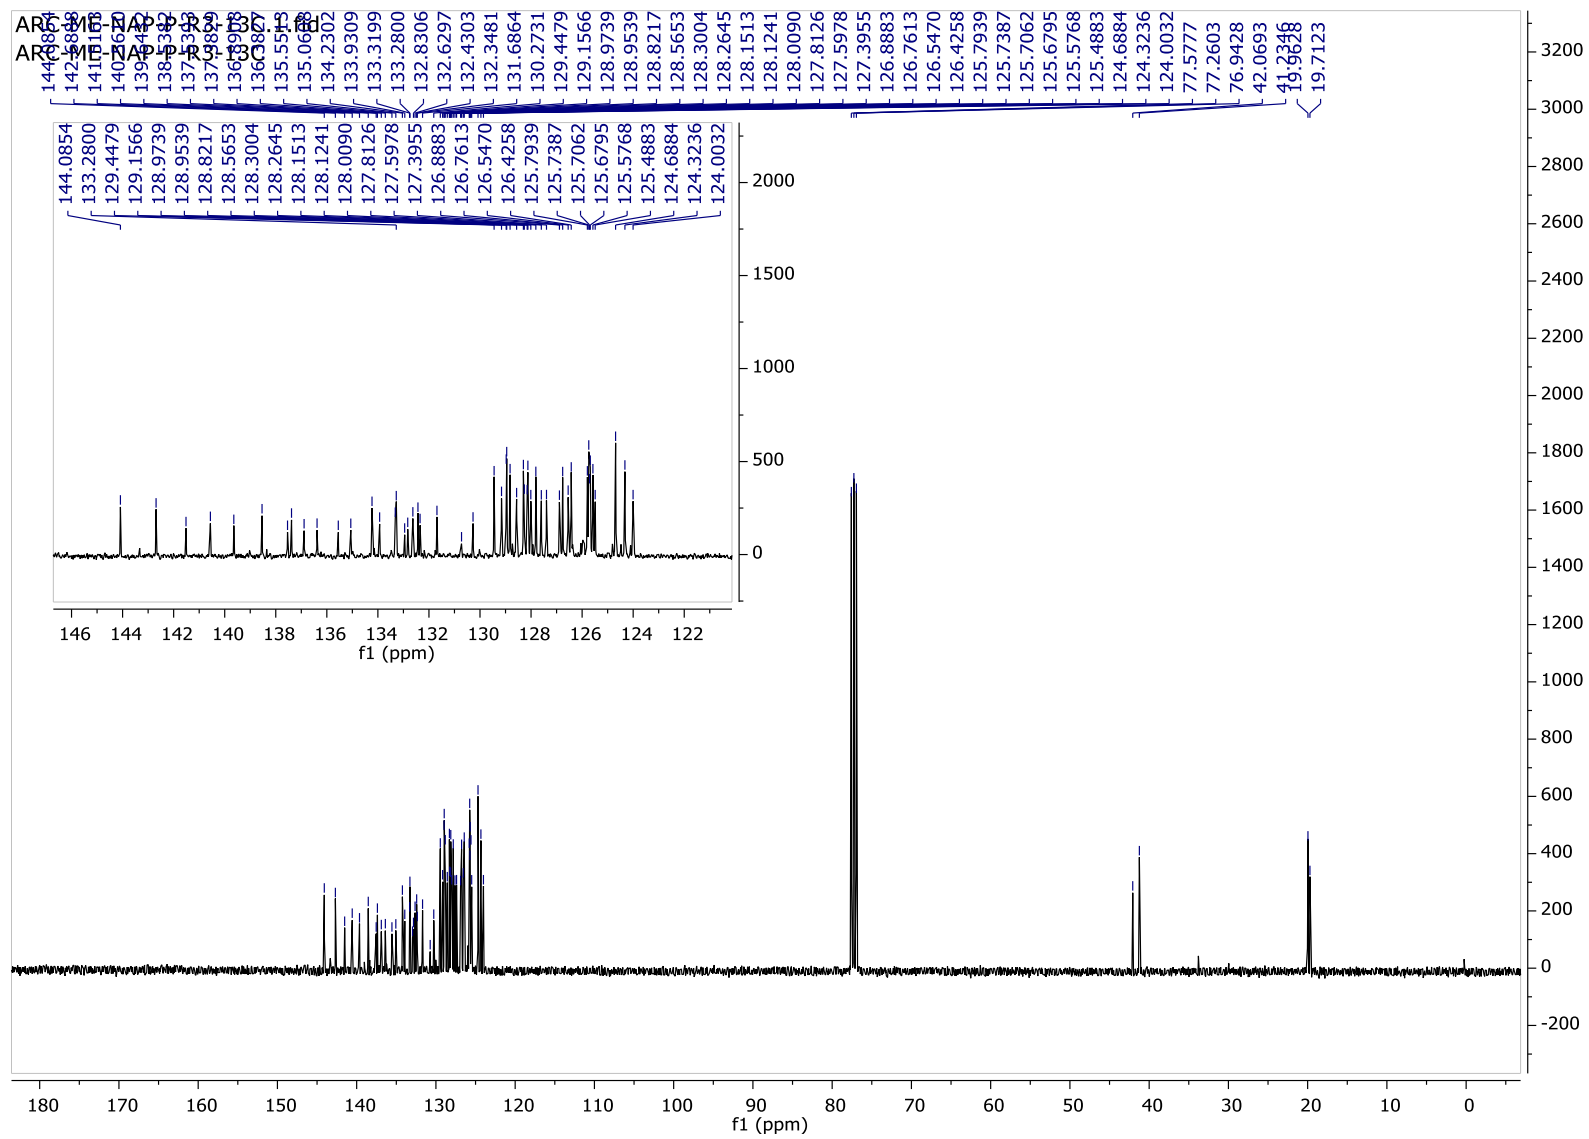

The crystal parameters of compound **3a**

|                                                     | CCDC 1873106                                |
|-----------------------------------------------------|---------------------------------------------|
| Formula                                             | C <sub>23</sub> H <sub>16</sub>             |
| Formula weight                                      | 292.36                                      |
| <i>T</i> /K                                         | 293(2)                                      |
| Crystal system                                      | Triclinic                                   |
| Space group                                         | P-1                                         |
| <i>a</i> /Å                                         | 8.7105(6)                                   |
| <i>b</i> /Å                                         | 9.7870(7)                                   |
| <i>c</i> /Å                                         | 10.2324(12)                                 |
| <i>α</i> <sup>°</sup>                               | 107.954(7)                                  |
| <i>β</i> <sup>°</sup>                               | 100.920(7)                                  |
| <i>γ</i> <sup>°</sup>                               | 104.829(5)                                  |
| <i>V</i> /Å <sup>3</sup>                            | 767.28(12)                                  |
| <i>Z</i>                                            | 2                                           |
| Abs. Coeff./mm <sup>-1</sup>                        | 0.072                                       |
| Abs. Correction                                     | Multi-Scan                                  |
| GOF on <i>F</i> <sup>2</sup>                        | 1.031                                       |
| Final <i>R</i> indices [ <i>I</i> > 2σ( <i>I</i> )] | <i>R</i> 1 = 0.0606<br><i>wR</i> 2 = 0.1172 |
| <i>R</i> indices [all data]                         | <i>R</i> 1 = 0.1672<br><i>wR</i> 2 = 0.1977 |

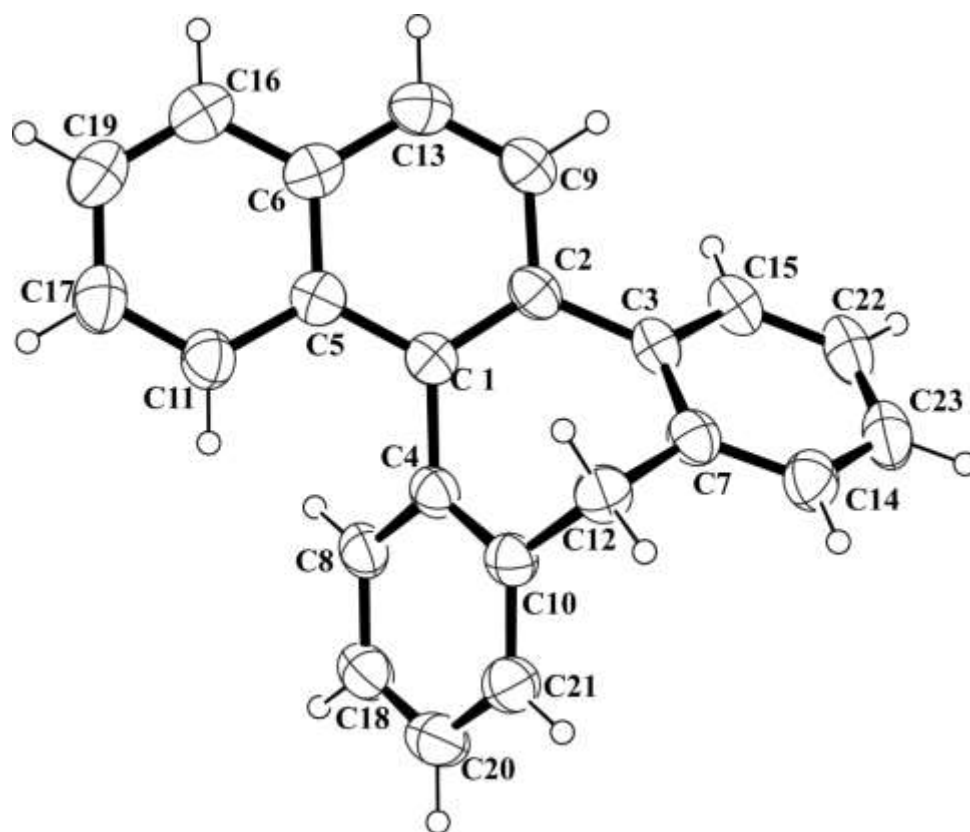

ORTEP diagram of compound **3a**, thermal ellipsoids are drawn on 35% probability level



The crystal parameters of compound **3c**

|                                                     | CCDC 1873107                              |
|-----------------------------------------------------|-------------------------------------------|
| Formula                                             | C <sub>24</sub> H <sub>18</sub>           |
| Formula weight                                      | 306.38                                    |
| <i>T</i> /K                                         | 293(2)                                    |
| Crystal system                                      | Monoclinic                                |
| Space group                                         | P2(1)/n                                   |
| <i>a</i> /Å                                         | 9.8016(6)                                 |
| <i>b</i> /Å                                         | 12.5556(7)                                |
| <i>c</i> /Å                                         | 14.0526(8)                                |
| <i>α</i> /°                                         | 90.00                                     |
| <i>β</i> /°                                         | 108.162(3)                                |
| <i>γ</i> /°                                         | 90.00                                     |
| <i>V</i> /Å <sup>3</sup>                            | 1643.22(17)                               |
| <i>Z</i>                                            | 4                                         |
| Abs. Coeff./mm <sup>-1</sup>                        | 0.070                                     |
| Abs. Correction                                     | Multi-Scan                                |
| GOF on <i>F</i> <sup>2</sup>                        | 1.074                                     |
| Final <i>R</i> indices [ <i>I</i> > 2σ( <i>I</i> )] | <i>RI</i> = 0.0517<br><i>wR2</i> = 0.0715 |
| <i>R</i> indices [all data]                         | <i>RI</i> = 0.1455<br><i>wR2</i> = 0.1611 |

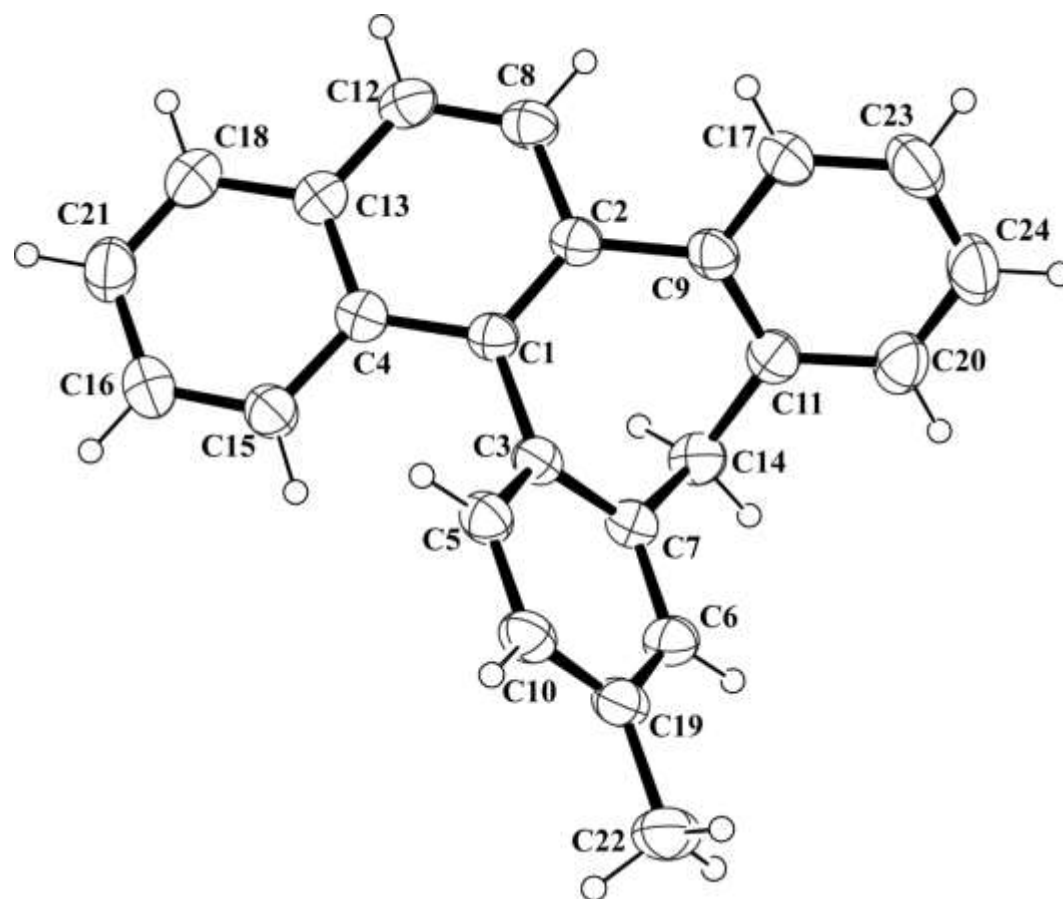

ORTEP diagram of compound 3c, thermal ellipsoids are drawn on 35% probability level

**Table 1: Energy optimized structure of 3a at [DFT-B3LYP/6-311++G(d,p)] level of theory**

| Compound Name | Method used             | Energy (Hartree) |
|---------------|-------------------------|------------------|
| 3a            | DFT-B3LYP/6-31+G(d,p)   | -886.168565      |
| 3a            | DFT-B3LYP/6-311++G(d,p) | -886.325690      |

**Optimized Structure of compound 3a**

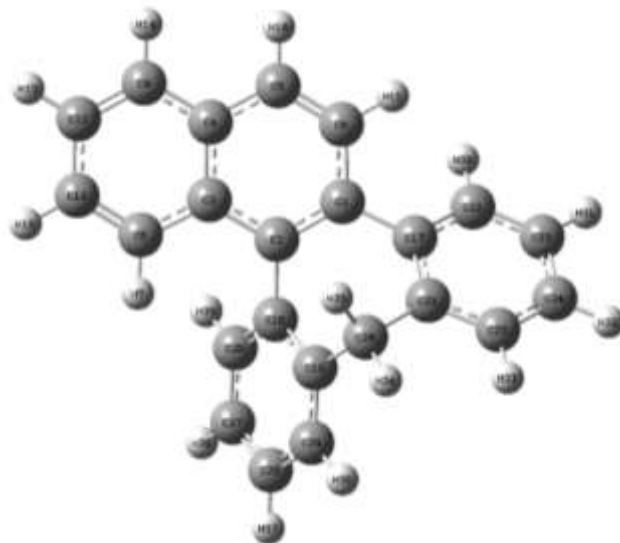

**Compound 3a [DFT-B3LYP/6-311++G(d,p)]**

**Table 2: Energy optimized structures of compounds 3q and 4q and their comparison**

| Compound Name                | Method used                    | Energy (Hartree)                |
|------------------------------|--------------------------------|---------------------------------|
| 3q                           | DFT-B3LYP/6-31+G(d,p)          | -1039.815027                    |
| 4q                           | DFT-B3LYP/6-31+G(d,p)          | -1039.820533                    |
| $\Delta E = E_{3q} - E_{4q}$ | <b>DFT-B3LYP/6-31+G(d,p)</b>   | <b>0.005506 (3.45 kcal/mol)</b> |
|                              |                                |                                 |
| 3q                           | DFT-B3LYP/6-311++G(d,p)        | -1039.998898                    |
| 4q                           | DFT-B3LYP/6-311++G(d,p)        | -1040.004372                    |
| $\Delta E = E_{3q} - E_{4q}$ | <b>DFT-B3LYP/6-311++G(d,p)</b> | <b>0.005474 (3.43 kcal/mol)</b> |

As we can see from Table 1, in DFT-B3LYP/6-31+G(d,p) method, Compound 3q is 0.005506 Hartree (3.45 kcal/mol) higher in energy than that of the Compound 4q. Similarly, in DFT-B3LYP/6-311++G(d,p) method, Compound 3q is 0.005474 Hartree (3.43 kcal/mole) higher in energy than that of the Compound 4q. In other words, Compound 4q is more stable than that of Compound 3q. (1 Hartree = 627.51 kcal/mole)

### Optimized Structure of compounds 3q and 4q

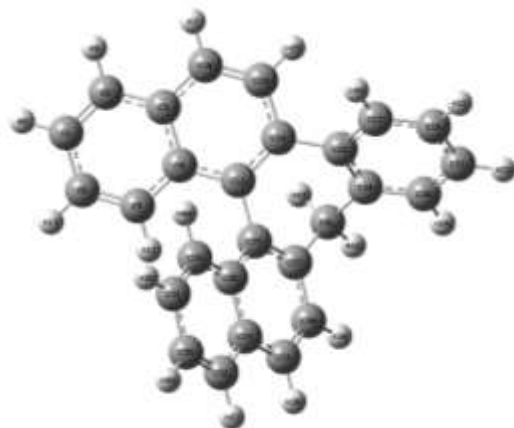

Compound 3q [DFT-B3LYP/6-311++G(d,p)]

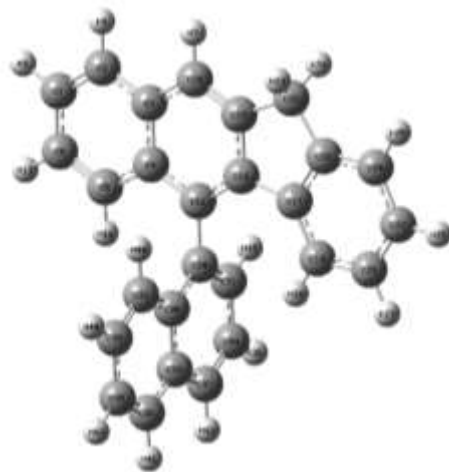

Compound 4q [DFT-B3LYP/6-311++G(d,p)]

# HPLC spectrum of compound 3a

IT-Guwahati

Project Name: Date: 20/02/2018  
 Reported by User: Breeze user (Breeze)

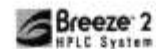

| SAMPLE INFORMATION                  |                                                                     |                  |                          |
|-------------------------------------|---------------------------------------------------------------------|------------------|--------------------------|
| Sample Name:                        | Ar-h-ph                                                             | Acquired By:     | Breeze                   |
| Sample Type:                        | Unknown                                                             | Date Acquired:   | 11/25/2020 2:39:30 PMIST |
| Vol:                                | 1                                                                   | Acq. Method:     | Hex_ARC                  |
| Injection#:                         | 1                                                                   | Processed By:    | Breeze                   |
| Injection Volume:                   | 20.00 ul                                                            | Date Processed:  | 11/25/2020 3:34:13 PMIST |
| Run Time:                           | 50.00 Minutes                                                       | Channel Name:    | V8489-QVA                |
| Sampling Rate:                      | 1.00 per sec                                                        | Channel Desc.:   | V8489-ChA.254nm          |
|                                     |                                                                     | Sample Set Name: |                          |
| Sample Values Used in Calculations: | Injection Volume = 20.00 Sample Weight = 1.00000 Dilution = 1.00000 |                  |                          |

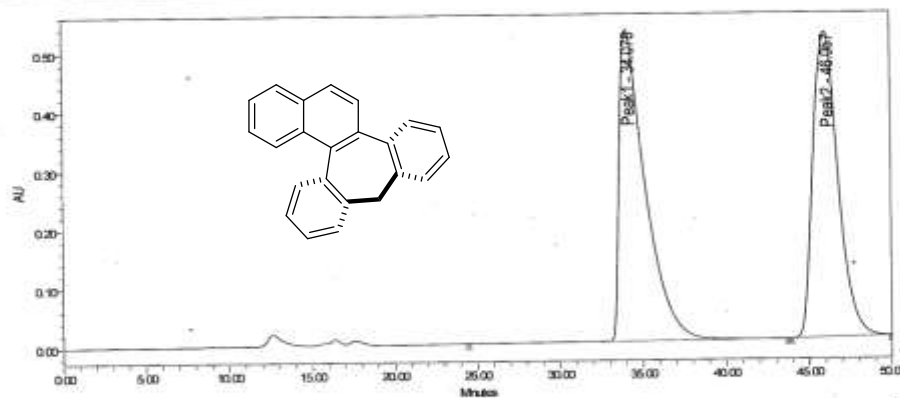

| Peak Name | RT (min) | Peak Type | Area (µV*sec) | %Area | Height (µV) | %Height | Integration Type | Response   | Peak Codes | Points Across Peak | Start Time (min) | End Time (min) | Baseline Start (min) |
|-----------|----------|-----------|---------------|-------|-------------|---------|------------------|------------|------------|--------------------|------------------|----------------|----------------------|
| Peak1     | 34.07    | Found     | 57105388      | 51.2% | 52520E      | 50.4%   | EB               | 5.711e+007 | QED        | 1192               | 24.467           | 43.733         | 24.467               |
| Peak2     | 46.057   | Found     | 5432800E      | 48.7% | 51900E      | 49.5%   | EB               | 5.433e+007 | QED        | 364                | 43.917           | 49.987         | 43.917               |

# HPLC spectrum of compound 3f

IT-Guwaiti  
Project Name:  
Reported by User:

Date: 20022018  
Breeze user (Breeze)

**Breeze 2**  
HPLC System

## SAMPLE INFORMATION

|                                     |                                                                     |                  |                          |
|-------------------------------------|---------------------------------------------------------------------|------------------|--------------------------|
| Sample Name:                        | Arp-OMe                                                             | Acquired By:     | Breeze                   |
| Sample Type:                        | Unknown                                                             | Date Acquired:   | 11/29/2020 4:54:48 PMIST |
| Vial:                               | 1                                                                   | Acq. Method:     | Hex_AFC                  |
| Injection#:                         | 1                                                                   | Processed By:    | Breeze                   |
| Injection Volume:                   | 20.00 ul                                                            | Date Processed:  | 11/29/2020 7:31:43 PMIST |
| Run Time:                           | 50.00 Minutes                                                       | Channel Name:    | V0489-01A                |
| Sampling Rate:                      | 1.00 per sec                                                        | Channel Desc.:   | V0489-01A.254nm          |
|                                     |                                                                     | Sample Sol Name: |                          |
| Sample Values Used in Calculations: | Injection Volume = 20.00 Sample Weight = 1.00000 Dilution = 1.00000 |                  |                          |

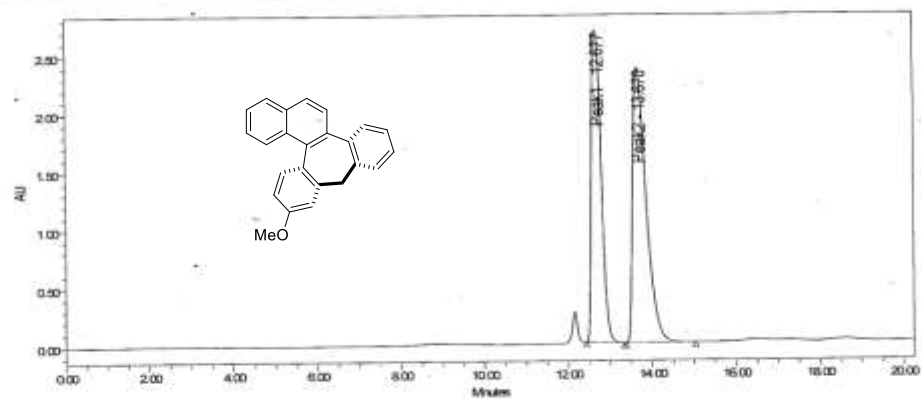

| Peak Name | RT (min) | Peak Type | Area (µM <sup>2</sup> /sec) | %Area | Height (µM) | %Height | Integration Type | Response   | Peak Cores | Points Across Peak | Start Time (min) | End Time (min) |
|-----------|----------|-----------|-----------------------------|-------|-------------|---------|------------------|------------|------------|--------------------|------------------|----------------|
| 1 Peak1   | 12.677   | Found     | 4375620E                    | 45.64 | 2883837     | 53.12   | BB               | 4.376e+007 | CB0        | 50                 | 12.432           | 13.367         |
| 2 Peak2   | 13.670   | Found     | 5211875E                    | 54.36 | 2366657     | 46.88   | BB               | 5.212e+007 | CB0        | 100                | 13.367           | 15.002         |

Report Method: Detailed Individual Report  
Page: 1 of 2

Printed: 11/29/2020  
7:33:02 AM User: Cakulite

## HPLC spectrum of compound 3q

IT-Guwahati  
Project Name  
Reported by User

Dev:20022018  
Breeze User (Breeze)

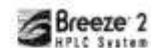

| SAMPLE INFORMATION                  |                                                                     |                  |                          |
|-------------------------------------|---------------------------------------------------------------------|------------------|--------------------------|
| Sample Name                         | Ar-h-rap-7                                                          | Acquired By:     | Breeze                   |
| Sample Type                         | Unknown                                                             | Date Acquired:   | 11/27/2020 4:51:34 PMIST |
| Val:                                | 1                                                                   | Acq. Method:     | HPLC_AFC                 |
| Injection#:                         | 2                                                                   | Processed By:    | Breeze                   |
| Injection Volume:                   | 20.00 ul                                                            | Date Processed:  | 11/27/2020 8:13:28 PMIST |
| Run Time:                           | 80.00 Minutes                                                       | Channel Name:    | VW89-01A                 |
| Sampling Rate:                      | 1.00 per sec                                                        | Channel Desc.:   | VW89-01A.254mm           |
|                                     |                                                                     | Sample Set Name: |                          |
| Sample Values Used in Calculations: | Injection Volume = 20.00 Sample Height = 1.00000 Dilution = 1.00000 |                  |                          |

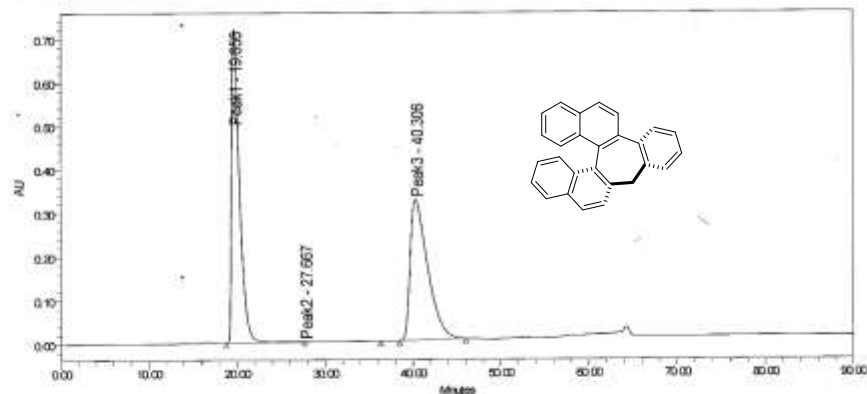

| Peak Name | RT (min) | Peak Type | Area (uV*sec) | %Area | Height (uV) | %Height | Integration Type | Response   | Peak Codes | Points Across Peak | Start Time (min) | End Time (min) |
|-----------|----------|-----------|---------------|-------|-------------|---------|------------------|------------|------------|--------------------|------------------|----------------|
| 1 Peak1   | 19.995   | Found     | 4437910E      | 50.2% | 718852      | 66.0%   | EV               | 4.48E+007  | C20        | 53E                | 19.732           | 27.667         |
| 2 Peak2   | 27.667   | Found     | 135750        | 0.1%  | 1272        | 0.1%    | V6               | 1.357E+002 | 005 C20    | 51E                | 27.667           | 28.317         |
| 3 Peak3   | 40.306   | Found     | 4448500E      | 49.8% | 32126       | 30.6%   | EB               | 4.448E+007 | C20        | 45E                | 38.48E           | 46.017         |



## HPLC spectrum of compound 4q

IT-Guwahati  
Project Name:  
Reported by User:

Date: 2022/01/18  
Breeze user (Breeze)

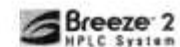

| SAMPLE INFORMATION                  |                                                                       |                 |                           |
|-------------------------------------|-----------------------------------------------------------------------|-----------------|---------------------------|
| Sample Name:                        | Ar-h-rap-6                                                            | Acquired By:    | Breeze                    |
| Sample Type:                        | Unknown                                                               | Date Acquired:  | 11/27/2020 8:58:09 PM MST |
| Vol:                                | 1                                                                     | Acq. Method:    | Hlx_AFC                   |
| Injection#:                         | 3                                                                     | Processed By:   | Breeze                    |
| Injection Volume:                   | 20.00 ul                                                              | Date Processed: | 11/27/2020 8:15:36 PM MST |
| Run Time:                           | 60.00 Minutes                                                         | Channel Name:   | VB48B ChA                 |
| Sampling Rate:                      | 1.00 per sec                                                          | Channel Desc:   | VB48B ChA.254nm           |
| Sample Values Used in Calculations: | Injection Volume = 20.00 Sample Weight = 1.000000 Dilution = 1.000000 |                 |                           |

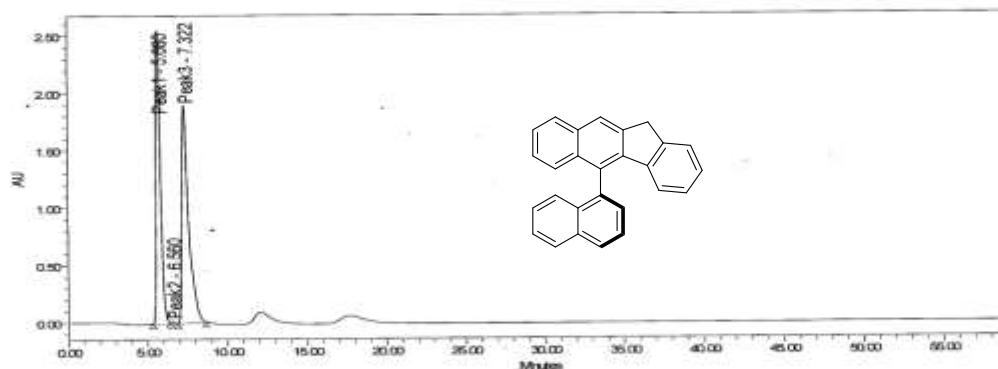

| Peak Name | RT (min) | Peak Type | Area (uV*sec) | %Area | Height (uV) | %Height | Integration Type | Response   | Peak Codes | Points Across Peak | Start Time (min) | End Time (min) | Baseline Start (min) |
|-----------|----------|-----------|---------------|-------|-------------|---------|------------------|------------|------------|--------------------|------------------|----------------|----------------------|
| 1 Peak1   | 5.686    | Found     | 49855346      | 46.62 | 256604E     | 57.01   | EV               | 4.566e+007 | CE0        | 62                 | 5.350            | 6.400          | 5.350                |
| 2 Peak2   | 6.550    | Found     | 405762        | 0.38  | 2422E       | 0.54    | VB               | 4.058e+00E | CE0        | 30                 | 6.400            | 6.900          | 5.350                |
| 3 Peak3   | 7.322    | Found     | 55557564      | 53.00 | 190110E     | 42.42   | EB               | 5.657e+007 | CE0        | 100                | 6.900            | 8.657          | 6.900                |

Report Method: Detailed Individual Report  
Page: 1 of 2

Printed: 11/27/2020  
8:15:31 PM Ases/Calculat

## References

- 1 R. Mancuso, S. Mehta, B. Gabriele, G. Salerno, W. S. Jenks and R. C. Larock, *J. Org. Chem.*, 2010, **75**, 897–901.
- 2 Y. –F. Qiu, Y. –J. Niu, X. Wei, B. –Q. Cao, X. –C. Wang and Z. –J. Quan, *J. Org. Chem.*, 2019, **84**, 4165–4178.
- 3 C. Wang, X. Xie, J. Liu, Y. Liu and Y. Li, *Chem. Eur. J.*, 2015, **21**, 559–564.
- 4 S. Ge, W. Cao, T. Kang, B. Hu, H. Zhang, Z. Su, X. Liu and X. Feng, *Angew. Chem. Int. Ed.*, 2019, **58**, 4017–4021.
- 5 X. Zeng, L. Ilies and E. Nakamura, *J. Am. Chem. Soc.* 2011, **133**, 17638–17640.
- 6 A. J. Cresswell, S. G. Davies, J. A. Lee, P. M. Roberts, A. J. Russell, J. E. Thomson and M. J. Tyte, *Org. Lett.*, 2010, **12**, 2936–2939.
